# Supplementary material for: CRISPRi is not strand-specific at all loci and redefines the transcriptional landscape
Source: eLife. 2017 Oct 23;6:e29878. doi: 10.7554/eLife.29878 (PMC5665645; doi:10.7554/eLife.29878)
Supplement: Source data 1. — Notes about yeast strain names Tab 2. Data supporting Figure 1C Tab 3. Data supporting Figure 1D Tab 4. Analysis of data in Tab 3 for Figure 1D Tab 5. Quantitation of all Northern blots for CRISPRi of HMS2 AS transcripts supporting Figure 2–4 Tab 6. Quantitation of all Northern blots for CRISPRi of HMS2 S transcripts experiments 1 and 2 supporting Figure 3—figure supplement 1. Tab 7. Quantitation of all Northern blots for CRISPRi of HMS2 S transcripts experiments 3 and 4 supporting Figure 3—figure supplement 1. Tab 8. Data analysis of comparison of CRISPRi versus genetic intervention (URA3) for HMS2 supporting Figure 4D–F Tab 9. HMS2 sliding probes supporting Figure 3E and 4F Tab 10. GAL1 AS CRISPRi data supporting Figure 3A–B Tab 11. All data for GAL1 CRISPRi supporting Figure 2-4 Tab 12. Data analysis of comparison of CRISPRi versus genetic intervention (TATA mutant) for GAL1 supporting Figure 4B–C Tab 13. Normalised dCas9 ChIP data at HMS2 supporting Figure 2—figure supplement 2. Tab 14. Combined dCas9 ChIP data at HMS2 for replicates 1–3 supporting Figure 2—figure supplement 2. Tab 15. Raw Ct data for dCas9 ChIP at HMS2 replicate one supporting Figure 2—figure supplement 2. Tab 16. Raw Ct data for dCas9 ChIP at HMS2 replicate two supporting Figure 2—figure supplement 2. Tab 17. Raw Ct data for dCas9 ChIP at HMS2 replicate three supporting Figure 2—figure supplement 2. All raw data can be found at Mendeley Data: http://dx.doi.org/10.17632/p2652vcdz8.2. [file elife-29878-data1.xlsx]

## Sheet: 1. Notes
Source data for Fig. 1-4 of 'CRISPRi is not strand-specific and redefines the transcriptional landscape'
All Northern blots were quanitfied from phosphorimager-collected images using Image J
Strain names were changed between performing the experiments and writing the manuscript. Please use key below:
HMS2 strains
Old Name	Name in manuscript
BY4741	WT
snR52::URA3	No sgRNA
S1A	S+77NT	clicked
S2A	S+106NT	clicked
S3A	S+179NT	clicked
AS1A	AS+243NT	clicked
AS2A	AS+276NT	clicked
AS3A	AS+59NT	clicked
S1M	S+77NT	full-length synthetic
S2M	S+106NT	full-length synthetic
S3M	S+179NT	full-length synthetic
AS1M	AS+243NT	full-length synthetic
AS2M	AS+276NT	full-length synthetic
AS3M	AS59NT	full-length synthetic
GAL1 strains
Old Name	Name in manuscript
ADH4	GAL1.ADH1t
snR52::URA3	No sgRNA
+28	AS+28NT
+112	AS+112NT
+93 (S)	AS+93T

## Sheet: 2. Fig. 1C
Source data for Fig. 1C Clicked v full-length synthetic oligos PCR efficiency as measure by qPCR
used 4 serial 10-fold dilutions starting at 1:10^6 dilution from 100 µM full-length synthetic stock
3 replicates at each dilution
used Rotorgene software to calculate R^2 and efficiency as if each sample was a standard curve									AVERAGE STDs 1-4
													SEM
	sgRNA	Efficiency	R^2						sgRNA		Efficiency	R^2	Efficiency	R^2
S1	Clicked	1.37	0.95249						S1	Clicked	1.38	0.958757	0.15308	0.0138911
	Full-length synthetic	1.18	0.99998							Full-length synthetic	1.035	0.99913	0.145	0.00085
S2	Clicked	0.89	0.99445						S2	Clicked	0.926667	0.986737	0.0233333	0.00774836
	Full-length synthetic	1.1	0.99644							Full-length synthetic	0.97	0.993617	0.07	0.0014157
S3	Clicked	0.9	0.99755						S3	Clicked	1.01333	0.981057	0.0768838	0.0148979
	Full-length synthetic	0.95	0.99852							Full-length synthetic	0.886667	0.996927	0.0375648	0.00108273
AS1	Clicked	0.97	0.98066						AS1	Clicked	0.97	0.982583	0.0057735	0.00769005
	Full-length synthetic	0.94	0.998							Full-length synthetic	0.913333	0.979033	0.031798	0.0127922
AS2	Clicked	0.87	0.9975						AS2	Clicked	1	0.930637	0.105987	0.0671986
	Full-length synthetic	0.87	0.99864							Full-length synthetic	1.11	0.98395	0.126623	0.00734819
AS3	Clicked	1.02	0.9911						AS3	Clicked	1.24	0.978083	0.11	0.0125694
	Full-length synthetic	0.96	0.99718							Full-length synthetic	0.96	0.995577	0.011547	0.00133317
											Efficieny
	sgRNA	Efficiency	R^2						T test		1	2	3	T test Click v FL
S1	Clicked	1.65	0.93845						S1	Clicked	1.37	1.65	1.12	0.0604481
	Full-length synthetic									Full-length synthetic	1.18		0.89
S2	Clicked	0.92	0.99452						S2	Clicked	0.89	0.92	0.97	0.685902
	Full-length synthetic	0.95	0.99202							Full-length synthetic	1.1	0.95	0.86
S3	Clicked	0.98	0.9943						S3	Clicked	0.9	0.98	1.16	0.38242
	Full-length synthetic	0.89	0.99486							Full-length synthetic	0.95	0.89	0.82
AS1	Clicked	0.96	0.99676						AS1	Clicked	0.97	0.96	0.98	0.266396
	Full-length synthetic	0.95	0.98442							Full-length synthetic	0.94	0.95	0.85
AS2	Clicked	0.92	0.99817						AS2	Clicked	0.87	0.92	1.21	0.256689
	Full-length synthetic	1.16	0.97698							Full-length synthetic	0.87	1.16	1.3
AS3	Clicked	1.35	0.9902						AS3	Clicked	1.02	1.35	1.35	0.126987
	Full-length synthetic	0.98	0.99662							Full-length synthetic	0.96	0.98	0.94
									plotting stds 1-4
	sgRNA	Efficiency	R^2						Efficiency	AVERAGE		SEM
S1	Clicked	1.12	0.98533							Clicked	Full-length synthetic	Clicked	Full-length synthetic
	Full-length synthetic	0.89	0.99828						S1	1.38	1.035	0.15308	0.145
S2	Clicked	0.97	0.97124						S2	0.926667	0.97	0.0233333	0.07
	Full-length synthetic	0.86	0.99239						S3	1.01333	0.886667	0.0768838	0.0375648
S3	Clicked	1.16	0.95132						AS1	0.97	0.913333	0.0057735	0.031798
	Full-length synthetic	0.82	0.9974						AS2	1	1.11	0.105987	0.126623
AS1	Clicked	0.98	0.97033						AS3	1.24	0.96	0.11	0.011547
	Full-length synthetic	0.85	0.95468
AS2	Clicked	1.21	0.79624
	Full-length synthetic	1.3	0.97623
AS3	Clicked	1.35	0.95295
	Full-length synthetic	0.94	0.99293
										all n.s. By T test

## Sheet: 3. Fig. 1D - RAW
Time	Blank	101	102	103	104	105	106	107	108	109	110	111	112	113	114	115	116	117	118	119	120	121	122	123	124	125	126	127	128	129	130	131	132	133	134	135	136	137	138	139	140	141	142	143	144	145	146	147	148
00:00:00	0	0.067	0.066	0.066	0.065	0.065	0.116	0.115	0.116	0.117	0.118	0.117	0.116	0.116	0.118	0.119	0.114	0.116	0.115	0.117	0.12	0.122	0.117	0.116	0.116	0.115	0.125	0.126	0.127	0.126	0.125	0.123	0.125	0.126	0.125	0.127	0.129	0.13	0.133	0.131	0.137	0.137	0.131	0.133	0.13	0.131	0.134	0.131	0.131
00:20:06	0	0.068	0.067	0.066	0.065	0.065	0.124	0.123	0.122	0.123	0.125	0.125	0.125	0.125	0.125	0.126	0.12	0.122	0.122	0.124	0.127	0.13	0.127	0.123	0.122	0.121	0.129	0.13	0.131	0.131	0.131	0.133	0.131	0.13	0.128	0.133	0.134	0.133	0.137	0.137	0.141	0.152	0.141	0.139	0.134	0.132	0.138	0.136	0.135
00:40:06	0	0.069	0.067	0.066	0.065	0.065	0.129	0.129	0.129	0.13	0.133	0.133	0.131	0.13	0.131	0.132	0.127	0.127	0.131	0.133	0.135	0.138	0.132	0.128	0.127	0.125	0.135	0.135	0.137	0.139	0.138	0.138	0.137	0.135	0.133	0.134	0.142	0.141	0.144	0.144	0.147	0.165	0.151	0.144	0.141	0.139	0.146	0.145	0.144
01:00:06	0	0.069	0.067	0.067	0.065	0.066	0.132	0.133	0.135	0.135	0.139	0.138	0.135	0.133	0.135	0.136	0.13	0.132	0.135	0.138	0.14	0.143	0.137	0.131	0.13	0.129	0.139	0.139	0.141	0.143	0.142	0.143	0.143	0.139	0.137	0.139	0.148	0.149	0.153	0.152	0.157	0.171	0.157	0.15	0.146	0.144	0.152	0.152	0.15
01:20:06	0	0.069	0.067	0.067	0.066	0.066	0.136	0.137	0.138	0.141	0.144	0.141	0.138	0.136	0.139	0.141	0.134	0.136	0.14	0.143	0.145	0.148	0.139	0.134	0.133	0.132	0.142	0.143	0.146	0.148	0.146	0.147	0.146	0.142	0.141	0.142	0.151	0.154	0.16	0.159	0.162	0.178	0.162	0.156	0.151	0.15	0.158	0.157	0.157
01:40:06	0	0.07	0.068	0.067	0.066	0.066	0.139	0.14	0.142	0.144	0.147	0.146	0.143	0.141	0.143	0.145	0.137	0.139	0.144	0.147	0.15	0.153	0.144	0.139	0.137	0.135	0.147	0.147	0.15	0.152	0.151	0.151	0.15	0.147	0.145	0.148	0.157	0.158	0.166	0.164	0.168	0.188	0.171	0.165	0.158	0.157	0.165	0.163	0.163
02:00:06	0	0.069	0.067	0.067	0.066	0.066	0.145	0.146	0.148	0.148	0.151	0.151	0.147	0.145	0.148	0.15	0.143	0.144	0.149	0.151	0.154	0.159	0.149	0.144	0.142	0.14	0.15	0.152	0.154	0.156	0.155	0.155	0.154	0.15	0.148	0.151	0.163	0.163	0.171	0.17	0.174	0.195	0.177	0.17	0.164	0.164	0.17	0.167	0.168
02:20:06	0	0.07	0.068	0.067	0.066	0.066	0.151	0.152	0.154	0.156	0.159	0.158	0.155	0.153	0.155	0.158	0.151	0.152	0.157	0.16	0.164	0.169	0.157	0.151	0.15	0.148	0.159	0.161	0.162	0.164	0.163	0.164	0.162	0.157	0.155	0.158	0.172	0.173	0.182	0.181	0.185	0.212	0.188	0.179	0.174	0.172	0.179	0.177	0.177
02:40:06	0	0.07	0.068	0.068	0.066	0.066	0.16	0.162	0.164	0.164	0.168	0.168	0.163	0.161	0.164	0.167	0.159	0.16	0.166	0.17	0.174	0.181	0.168	0.161	0.159	0.156	0.171	0.172	0.172	0.176	0.175	0.172	0.171	0.168	0.167	0.168	0.182	0.184	0.193	0.191	0.195	0.224	0.201	0.19	0.184	0.183	0.19	0.186	0.187
03:00:06	0	0.07	0.068	0.068	0.066	0.066	0.17	0.17	0.174	0.174	0.179	0.179	0.174	0.171	0.174	0.178	0.169	0.171	0.178	0.182	0.186	0.191	0.178	0.17	0.169	0.166	0.18	0.181	0.182	0.185	0.185	0.182	0.181	0.177	0.176	0.177	0.194	0.195	0.204	0.203	0.205	0.236	0.215	0.204	0.197	0.195	0.203	0.199	0.199
03:20:06	0	0.07	0.068	0.068	0.066	0.067	0.184	0.183	0.185	0.187	0.192	0.195	0.185	0.184	0.19	0.193	0.181	0.183	0.19	0.194	0.199	0.206	0.192	0.183	0.182	0.178	0.191	0.192	0.193	0.196	0.196	0.194	0.192	0.189	0.187	0.188	0.209	0.209	0.22	0.218	0.22	0.25	0.228	0.216	0.209	0.207	0.214	0.21	0.212
03:40:06	0	0.071	0.068	0.068	0.067	0.067	0.195	0.199	0.202	0.202	0.208	0.208	0.203	0.198	0.201	0.204	0.194	0.197	0.207	0.212	0.216	0.219	0.205	0.197	0.194	0.191	0.204	0.205	0.205	0.209	0.209	0.206	0.205	0.202	0.2	0.201	0.224	0.226	0.236	0.234	0.235	0.265	0.245	0.232	0.224	0.223	0.231	0.228	0.228
04:00:06	0	0.071	0.068	0.068	0.067	0.067	0.211	0.214	0.217	0.22	0.226	0.225	0.218	0.218	0.223	0.225	0.21	0.211	0.22	0.225	0.229	0.235	0.221	0.211	0.211	0.208	0.22	0.221	0.222	0.227	0.227	0.222	0.22	0.216	0.214	0.215	0.239	0.24	0.254	0.25	0.253	0.287	0.263	0.25	0.241	0.239	0.246	0.242	0.244
04:20:06	0	0.071	0.068	0.068	0.066	0.067	0.231	0.236	0.237	0.238	0.245	0.243	0.239	0.233	0.239	0.244	0.227	0.23	0.239	0.245	0.25	0.253	0.24	0.229	0.227	0.224	0.239	0.24	0.24	0.245	0.245	0.238	0.237	0.234	0.232	0.232	0.257	0.258	0.272	0.271	0.274	0.309	0.283	0.265	0.256	0.256	0.262	0.258	0.261
04:40:06	0	0.071	0.068	0.068	0.067	0.067	0.254	0.254	0.256	0.256	0.264	0.265	0.257	0.255	0.26	0.262	0.247	0.249	0.257	0.263	0.268	0.272	0.259	0.247	0.248	0.243	0.255	0.256	0.256	0.262	0.262	0.256	0.254	0.25	0.248	0.25	0.275	0.275	0.291	0.289	0.295	0.33	0.304	0.288	0.28	0.277	0.279	0.275	0.277
05:00:06	0	0.071	0.068	0.068	0.067	0.067	0.274	0.276	0.278	0.279	0.288	0.292	0.282	0.277	0.284	0.286	0.265	0.269	0.28	0.287	0.293	0.294	0.279	0.267	0.265	0.261	0.273	0.274	0.274	0.281	0.279	0.275	0.273	0.268	0.266	0.266	0.295	0.296	0.311	0.31	0.318	0.355	0.328	0.312	0.302	0.299	0.304	0.299	0.298
05:20:06	0	0.071	0.069	0.068	0.067	0.067	0.303	0.304	0.306	0.307	0.316	0.319	0.308	0.304	0.312	0.316	0.292	0.295	0.307	0.314	0.319	0.32	0.306	0.295	0.293	0.289	0.299	0.301	0.299	0.306	0.306	0.3	0.298	0.294	0.292	0.292	0.322	0.324	0.343	0.339	0.346	0.381	0.355	0.338	0.328	0.327	0.334	0.327	0.329
05:40:06	0	0.071	0.068	0.068	0.067	0.067	0.332	0.334	0.335	0.335	0.344	0.345	0.338	0.333	0.342	0.346	0.32	0.322	0.335	0.341	0.345	0.348	0.331	0.322	0.321	0.316	0.324	0.325	0.326	0.332	0.331	0.326	0.323	0.319	0.316	0.317	0.357	0.358	0.376	0.369	0.372	0.41	0.386	0.368	0.358	0.359	0.366	0.361	0.359
06:00:06	0	0.071	0.069	0.068	0.067	0.067	0.363	0.367	0.368	0.366	0.376	0.376	0.369	0.363	0.374	0.379	0.348	0.351	0.365	0.372	0.375	0.378	0.361	0.35	0.35	0.345	0.354	0.355	0.356	0.363	0.362	0.355	0.352	0.347	0.344	0.345	0.391	0.391	0.41	0.402	0.399	0.436	0.418	0.401	0.39	0.391	0.397	0.392	0.39
06:20:06	0	0.071	0.068	0.068	0.067	0.067	0.4	0.403	0.403	0.401	0.41	0.41	0.404	0.4	0.411	0.416	0.381	0.383	0.399	0.406	0.409	0.41	0.394	0.384	0.383	0.378	0.384	0.386	0.388	0.395	0.393	0.388	0.383	0.378	0.375	0.376	0.427	0.427	0.445	0.434	0.427	0.471	0.453	0.434	0.425	0.427	0.43	0.424	0.422
06:40:06	0	0.071	0.068	0.068	0.067	0.066	0.439	0.439	0.439	0.435	0.443	0.445	0.442	0.44	0.451	0.456	0.419	0.422	0.435	0.442	0.445	0.446	0.431	0.42	0.42	0.415	0.421	0.421	0.424	0.431	0.428	0.423	0.419	0.413	0.41	0.411	0.463	0.464	0.481	0.47	0.462	0.509	0.49	0.47	0.462	0.462	0.465	0.46	0.456
07:00:06	0	0.071	0.068	0.068	0.066	0.066	0.478	0.48	0.48	0.474	0.484	0.485	0.483	0.48	0.492	0.497	0.457	0.46	0.475	0.481	0.485	0.484	0.468	0.457	0.458	0.452	0.457	0.458	0.46	0.468	0.465	0.46	0.457	0.45	0.447	0.448	0.505	0.505	0.524	0.512	0.503	0.549	0.53	0.511	0.501	0.502	0.505	0.499	0.496
07:20:06	0	0.071	0.068	0.068	0.066	0.066	0.522	0.524	0.521	0.513	0.526	0.525	0.523	0.523	0.536	0.539	0.5	0.502	0.516	0.522	0.526	0.524	0.507	0.499	0.5	0.494	0.499	0.501	0.502	0.51	0.506	0.499	0.498	0.493	0.489	0.489	0.545	0.546	0.567	0.554	0.543	0.592	0.571	0.55	0.541	0.543	0.545	0.539	0.535
07:40:06	0	0.07	0.068	0.067	0.066	0.066	0.565	0.567	0.565	0.557	0.57	0.568	0.567	0.565	0.58	0.583	0.54	0.542	0.558	0.564	0.568	0.566	0.551	0.54	0.542	0.535	0.538	0.54	0.542	0.55	0.545	0.54	0.539	0.532	0.53	0.53	0.589	0.589	0.608	0.594	0.583	0.632	0.614	0.594	0.583	0.586	0.586	0.58	0.577
08:00:06	0	0.071	0.068	0.068	0.067	0.066	0.611	0.613	0.611	0.602	0.616	0.616	0.615	0.614	0.629	0.631	0.587	0.589	0.605	0.612	0.615	0.612	0.596	0.587	0.591	0.581	0.587	0.589	0.59	0.598	0.591	0.585	0.585	0.579	0.576	0.577	0.632	0.633	0.656	0.639	0.627	0.68	0.661	0.639	0.629	0.631	0.63	0.624	0.62
08:20:06	0	0.071	0.069	0.068	0.067	0.067	0.662	0.664	0.66	0.651	0.665	0.665	0.665	0.664	0.679	0.682	0.638	0.639	0.654	0.661	0.666	0.662	0.644	0.637	0.639	0.63	0.637	0.638	0.639	0.647	0.64	0.634	0.635	0.627	0.625	0.625	0.68	0.681	0.702	0.686	0.675	0.729	0.709	0.686	0.675	0.677	0.678	0.671	0.666
08:40:06	0	0.071	0.069	0.068	0.067	0.067	0.71	0.711	0.708	0.698	0.713	0.714	0.711	0.71	0.726	0.729	0.683	0.685	0.701	0.709	0.714	0.709	0.69	0.683	0.685	0.676	0.684	0.686	0.687	0.693	0.687	0.681	0.682	0.675	0.673	0.672	0.727	0.728	0.75	0.734	0.722	0.774	0.755	0.732	0.721	0.723	0.723	0.716	0.712
09:00:06	0	0.071	0.068	0.068	0.067	0.066	0.758	0.761	0.756	0.747	0.763	0.761	0.761	0.761	0.777	0.781	0.732	0.734	0.752	0.758	0.76	0.756	0.741	0.732	0.735	0.725	0.732	0.734	0.733	0.742	0.734	0.726	0.729	0.721	0.722	0.72	0.77	0.773	0.793	0.778	0.766	0.822	0.802	0.776	0.766	0.772	0.767	0.758	0.758
09:20:06	0	0.071	0.068	0.068	0.067	0.067	0.808	0.81	0.807	0.797	0.812	0.81	0.808	0.808	0.824	0.828	0.784	0.783	0.802	0.81	0.81	0.807	0.788	0.782	0.785	0.774	0.78	0.784	0.783	0.792	0.785	0.776	0.778	0.771	0.77	0.768	0.817	0.822	0.844	0.826	0.813	0.865	0.848	0.825	0.814	0.815	0.814	0.807	0.804
09:40:06	0	0.071	0.068	0.068	0.067	0.067	0.856	0.857	0.855	0.847	0.861	0.858	0.855	0.856	0.871	0.875	0.832	0.833	0.851	0.858	0.861	0.854	0.837	0.829	0.834	0.823	0.829	0.832	0.832	0.841	0.833	0.824	0.826	0.819	0.818	0.816	0.862	0.867	0.888	0.871	0.858	0.909	0.892	0.868	0.857	0.86	0.857	0.85	0.849
10:00:06	0	0.071	0.068	0.068	0.067	0.067	0.904	0.906	0.905	0.895	0.908	0.905	0.904	0.904	0.919	0.922	0.881	0.883	0.9	0.908	0.908	0.904	0.886	0.879	0.882	0.873	0.879	0.88	0.881	0.889	0.883	0.871	0.872	0.866	0.866	0.863	0.909	0.913	0.933	0.914	0.9	0.952	0.937	0.913	0.902	0.904	0.902	0.896	0.894
10:20:06	0	0.071	0.069	0.068	0.067	0.067	0.948	0.949	0.946	0.939	0.953	0.948	0.947	0.947	0.963	0.966	0.926	0.928	0.946	0.953	0.953	0.947	0.931	0.924	0.928	0.918	0.922	0.925	0.925	0.932	0.927	0.915	0.917	0.91	0.911	0.907	0.948	0.954	0.974	0.956	0.94	0.992	0.978	0.954	0.945	0.946	0.944	0.938	0.936
10:40:06	0	0.071	0.068	0.068	0.067	0.067	0.99	0.991	0.991	0.981	0.996	0.989	0.989	0.99	1.003	1.006	0.971	0.972	0.989	0.997	0.995	0.991	0.975	0.971	0.972	0.963	0.966	0.968	0.969	0.976	0.97	0.959	0.961	0.954	0.954	0.952	0.99	0.997	1.014	0.998	0.981	1.033	1.019	0.994	0.984	0.985	0.984	0.978	0.976
11:00:06	0	0.071	0.068	0.068	0.067	0.067	1.031	1.031	1.029	1.022	1.036	1.03	1.031	1.032	1.044	1.047	1.015	1.016	1.033	1.04	1.038	1.033	1.017	1.012	1.016	1.007	1.008	1.011	1.012	1.019	1.014	1.001	1.004	0.997	0.996	0.994	1.029	1.037	1.052	1.035	1.018	1.07	1.059	1.035	1.025	1.025	1.025	1.017	1.016
11:20:06	0	0.071	0.068	0.068	0.067	0.067	1.069	1.069	1.068	1.062	1.075	1.068	1.069	1.07	1.082	1.083	1.057	1.057	1.073	1.081	1.078	1.073	1.057	1.054	1.056	1.048	1.048	1.05	1.049	1.056	1.051	1.041	1.044	1.036	1.036	1.034	1.068	1.076	1.091	1.074	1.055	1.109	1.096	1.074	1.062	1.063	1.061	1.055	1.053
11:40:06	0	0.071	0.068	0.068	0.067	0.067	1.107	1.105	1.104	1.098	1.112	1.105	1.106	1.107	1.118	1.12	1.094	1.098	1.112	1.119	1.116	1.108	1.096	1.093	1.097	1.089	1.087	1.088	1.089	1.096	1.09	1.078	1.081	1.074	1.075	1.072	1.102	1.108	1.129	1.111	1.093	1.139	1.129	1.109	1.1	1.097	1.097	1.092	1.091
12:00:06	0	0.071	0.069	0.068	0.067	0.067	1.14	1.138	1.138	1.133	1.146	1.138	1.143	1.143	1.153	1.154	1.13	1.134	1.148	1.155	1.151	1.144	1.133	1.129	1.132	1.125	1.121	1.122	1.124	1.131	1.125	1.115	1.117	1.112	1.112	1.108	1.137	1.141	1.16	1.144	1.126	1.17	1.162	1.142	1.133	1.132	1.13	1.124	1.123
12:20:06	0	0.071	0.069	0.068	0.067	0.067	1.172	1.172	1.172	1.167	1.178	1.171	1.178	1.179	1.186	1.186	1.165	1.169	1.183	1.19	1.184	1.175	1.167	1.163	1.169	1.159	1.155	1.156	1.156	1.164	1.158	1.146	1.149	1.143	1.145	1.141	1.169	1.173	1.192	1.176	1.157	1.199	1.193	1.173	1.165	1.164	1.162	1.157	1.154
12:40:06	0	0.071	0.069	0.068	0.067	0.067	1.202	1.201	1.203	1.197	1.206	1.2	1.211	1.211	1.216	1.217	1.196	1.2	1.212	1.22	1.212	1.205	1.197	1.193	1.199	1.19	1.184	1.187	1.186	1.194	1.188	1.175	1.18	1.174	1.175	1.172	1.198	1.2	1.221	1.205	1.186	1.228	1.222	1.203	1.195	1.19	1.189	1.185	1.184
13:00:06	0	0.071	0.069	0.068	0.067	0.067	1.232	1.229	1.23	1.225	1.235	1.229	1.244	1.239	1.244	1.245	1.225	1.229	1.241	1.249	1.241	1.234	1.226	1.222	1.227	1.22	1.212	1.214	1.214	1.221	1.215	1.201	1.206	1.201	1.202	1.2	1.225	1.225	1.249	1.231	1.212	1.253	1.249	1.231	1.223	1.22	1.217	1.213	1.212
13:20:06	0	0.071	0.069	0.068	0.067	0.067	1.259	1.256	1.258	1.257	1.264	1.258	1.273	1.269	1.271	1.273	1.253	1.257	1.269	1.276	1.273	1.261	1.256	1.251	1.258	1.249	1.241	1.243	1.242	1.251	1.243	1.228	1.234	1.229	1.233	1.228	1.252	1.224	1.276	1.26	1.239	1.277	1.276	1.258	1.25	1.245	1.244	1.238	1.239
13:40:05	0	0.071	0.069	0.068	0.067	0.067	1.285	1.282	1.284	1.284	1.29	1.283	1.3	1.294	1.297	1.297	1.278	1.282	1.295	1.302	1.296	1.285	1.28	1.276	1.286	1.274	1.267	1.268	1.267	1.278	1.269	1.253	1.26	1.256	1.26	1.254	1.276	1.246	1.301	1.287	1.263	1.301	1.3	1.282	1.275	1.271	1.269	1.266	1.264
14:00:06	0	0.071	0.069	0.068	0.068	0.067	1.307	1.305	1.306	1.306	1.315	1.304	1.323	1.317	1.318	1.32	1.302	1.306	1.317	1.323	1.318	1.305	1.302	1.299	1.309	1.297	1.29	1.291	1.29	1.3	1.291	1.275	1.282	1.277	1.284	1.278	1.299	1.279	1.321	1.308	1.284	1.321	1.322	1.306	1.297	1.291	1.293	1.289	1.288
14:20:06	0	0.071	0.069	0.068	0.067	0.067	1.327	1.325	1.326	1.326	1.336	1.324	1.346	1.338	1.338	1.339	1.321	1.325	1.337	1.343	1.336	1.324	1.323	1.319	1.329	1.318	1.31	1.312	1.311	1.323	1.312	1.297	1.304	1.3	1.306	1.298	1.318	1.26	1.342	1.327	1.303	1.339	1.341	1.325	1.317	1.312	1.313	1.311	1.308
14:40:06	0	0.071	0.069	0.068	0.067	0.067	1.343	1.342	1.344	1.344	1.354	1.341	1.363	1.355	1.354	1.355	1.337	1.343	1.353	1.359	1.352	1.34	1.34	1.336	1.348	1.335	1.328	1.33	1.327	1.339	1.329	1.313	1.321	1.32	1.325	1.316	1.335	1.322	1.357	1.344	1.319	1.354	1.356	1.339	1.335	1.331	1.33	1.327	1.328
15:00:06	0	0.071	0.069	0.069	0.068	0.067	1.36	1.358	1.365	1.364	1.375	1.358	1.382	1.372	1.371	1.372	1.354	1.363	1.371	1.377	1.372	1.358	1.357	1.354	1.365	1.354	1.355	1.35	1.348	1.359	1.348	1.331	1.338	1.336	1.346	1.336	1.353	1.224	1.376	1.362	1.337	1.368	1.372	1.356	1.353	1.348	1.349	1.348	1.346
15:20:06	0	0.071	0.069	0.068	0.068	0.067	1.374	1.375	1.381	1.383	1.391	1.37	1.397	1.386	1.386	1.386	1.371	1.379	1.384	1.391	1.385	1.37	1.372	1.368	1.38	1.368	1.371	1.367	1.362	1.376	1.364	1.346	1.355	1.354	1.362	1.353	1.369	1.303	1.389	1.379	1.35	1.382	1.387	1.371	1.367	1.363	1.364	1.364	1.362
15:40:06	0	0.071	0.069	0.068	0.068	0.068	1.385	1.385	1.394	1.394	1.4	1.383	1.409	1.399	1.397	1.397	1.382	1.392	1.397	1.403	1.395	1.382	1.385	1.381	1.394	1.38	1.384	1.38	1.376	1.388	1.377	1.355	1.367	1.368	1.376	1.367	1.381	1.343	1.402	1.39	1.362	1.392	1.397	1.384	1.38	1.375	1.378	1.378	1.377
16:00:06	0	0.071	0.069	0.069	0.068	0.068	1.398	1.397	1.414	1.407	1.414	1.394	1.421	1.41	1.408	1.409	1.394	1.404	1.409	1.414	1.406	1.393	1.395	1.393	1.406	1.393	1.398	1.394	1.39	1.403	1.391	1.371	1.381	1.381	1.39	1.379	1.393	1.355	1.414	1.405	1.373	1.401	1.409	1.394	1.391	1.385	1.389	1.393	1.39
16:20:06	0	0.071	0.069	0.069	0.068	0.068	1.406	1.405	1.425	1.417	1.426	1.402	1.431	1.42	1.417	1.418	1.403	1.415	1.419	1.423	1.415	1.401	1.404	1.403	1.421	1.403	1.409	1.404	1.398	1.412	1.399	1.382	1.391	1.393	1.4	1.39	1.402	1.318	1.423	1.414	1.382	1.408	1.418	1.402	1.4	1.396	1.4	1.404	1.4
16:40:06	0	0.071	0.069	0.069	0.068	0.068	1.415	1.415	1.436	1.427	1.437	1.411	1.44	1.429	1.426	1.425	1.411	1.425	1.426	1.431	1.425	1.408	1.413	1.411	1.432	1.413	1.417	1.415	1.407	1.423	1.408	1.39	1.4	1.401	1.41	1.4	1.411	1.342	1.43	1.423	1.389	1.415	1.423	1.409	1.408	1.404	1.413	1.414	1.409
17:00:06	0	0.071	0.069	0.069	0.068	0.068	1.422	1.425	1.443	1.434	1.443	1.417	1.447	1.436	1.435	1.432	1.418	1.431	1.432	1.437	1.43	1.414	1.421	1.418	1.439	1.419	1.424	1.422	1.415	1.43	1.416	1.397	1.407	1.41	1.419	1.407	1.418	1.372	1.436	1.428	1.394	1.419	1.429	1.415	1.415	1.412	1.42	1.422	1.418
17:20:06	0	0.071	0.07	0.069	0.068	0.068	1.426	1.429	1.448	1.442	1.451	1.422	1.451	1.442	1.438	1.435	1.422	1.436	1.436	1.442	1.436	1.417	1.424	1.422	1.442	1.424	1.432	1.428	1.421	1.439	1.422	1.403	1.412	1.415	1.423	1.411	1.422	1.344	1.442	1.435	1.399	1.423	1.433	1.419	1.419	1.414	1.426	1.429	1.423
17:40:06	0	0.071	0.069	0.069	0.068	0.068	1.428	1.431	1.452	1.446	1.456	1.425	1.453	1.444	1.441	1.439	1.425	1.439	1.439	1.444	1.439	1.419	1.425	1.425	1.445	1.425	1.435	1.431	1.425	1.441	1.425	1.407	1.416	1.419	1.427	1.414	1.424	1.344	1.444	1.438	1.401	1.425	1.436	1.423	1.422	1.416	1.429	1.434	1.426
18:00:06	0	0.071	0.07	0.069	0.068	0.068	1.43	1.433	1.454	1.449	1.458	1.428	1.455	1.446	1.443	1.438	1.426	1.44	1.439	1.446	1.44	1.421	1.428	1.427	1.447	1.428	1.437	1.433	1.426	1.444	1.427	1.409	1.418	1.421	1.432	1.417	1.425	1.357	1.444	1.437	1.402	1.425	1.438	1.423	1.423	1.418	1.43	1.437	1.429
18:20:06	0	0.071	0.07	0.07	0.069	0.069	1.43	1.432	1.454	1.452	1.461	1.428	1.456	1.445	1.441	1.438	1.427	1.442	1.441	1.447	1.444	1.422	1.429	1.428	1.448	1.428	1.438	1.434	1.427	1.445	1.429	1.41	1.418	1.423	1.434	1.418	1.426	1.368	1.444	1.438	1.403	1.424	1.437	1.422	1.422	1.417	1.431	1.436	1.43
18:40:06	0	0.071	0.07	0.069	0.069	0.069	1.431	1.432	1.454	1.452	1.46	1.428	1.456	1.445	1.443	1.438	1.428	1.443	1.441	1.447	1.443	1.423	1.431	1.428	1.449	1.43	1.439	1.434	1.428	1.445	1.429	1.409	1.419	1.423	1.433	1.419	1.427	1.36	1.445	1.439	1.404	1.425	1.436	1.422	1.422	1.418	1.431	1.439	1.429
19:00:06	0	0.071	0.07	0.07	0.069	0.069	1.43	1.431	1.454	1.451	1.46	1.427	1.456	1.445	1.445	1.439	1.428	1.442	1.441	1.447	1.442	1.422	1.43	1.429	1.45	1.429	1.439	1.435	1.428	1.447	1.429	1.41	1.419	1.422	1.434	1.419	1.427	1.384	1.445	1.438	1.403	1.425	1.436	1.422	1.422	1.417	1.431	1.437	1.429
19:20:06	0	0.071	0.07	0.069	0.069	0.069	1.43	1.432	1.455	1.454	1.465	1.428	1.459	1.447	1.443	1.439	1.428	1.444	1.443	1.448	1.447	1.423	1.432	1.429	1.451	1.431	1.441	1.436	1.428	1.45	1.431	1.412	1.421	1.424	1.435	1.42	1.428	1.358	1.446	1.441	1.404	1.425	1.437	1.426	1.424	1.418	1.433	1.439	1.431
19:40:06	0	0.072	0.07	0.07	0.069	0.069	1.431	1.433	1.455	1.454	1.465	1.428	1.459	1.447	1.444	1.439	1.429	1.446	1.442	1.448	1.446	1.423	1.432	1.429	1.451	1.431	1.442	1.437	1.429	1.45	1.431	1.412	1.422	1.424	1.435	1.42	1.428	1.357	1.446	1.442	1.405	1.425	1.437	1.425	1.424	1.419	1.434	1.439	1.43
20:00:06	0	0.072	0.07	0.07	0.069	0.069	1.431	1.433	1.456	1.454	1.464	1.426	1.458	1.447	1.444	1.439	1.43	1.444	1.443	1.449	1.446	1.425	1.434	1.43	1.451	1.433	1.442	1.436	1.429	1.45	1.431	1.411	1.421	1.424	1.436	1.421	1.428	1.364	1.446	1.441	1.403	1.423	1.435	1.424	1.424	1.419	1.433	1.44	1.432
20:20:06	0	0.072	0.07	0.07	0.069	0.069	1.428	1.43	1.454	1.453	1.463	1.425	1.457	1.446	1.442	1.437	1.428	1.444	1.442	1.448	1.444	1.423	1.431	1.429	1.451	1.431	1.443	1.436	1.428	1.45	1.43	1.411	1.421	1.423	1.434	1.419	1.427	1.363	1.445	1.44	1.403	1.423	1.435	1.426	1.423	1.417	1.432	1.439	1.429
20:40:06	0	0.072	0.07	0.07	0.07	0.069	1.428	1.429	1.454	1.452	1.462	1.426	1.456	1.446	1.442	1.439	1.43	1.445	1.443	1.448	1.447	1.424	1.433	1.43	1.451	1.431	1.442	1.435	1.428	1.448	1.43	1.409	1.42	1.422	1.434	1.419	1.428	1.366	1.446	1.44	1.403	1.421	1.432	1.424	1.423	1.417	1.432	1.439	1.43
21:00:06	0	0.072	0.071	0.07	0.069	0.069	1.429	1.429	1.455	1.453	1.464	1.426	1.457	1.447	1.443	1.438	1.43	1.445	1.444	1.449	1.447	1.424	1.434	1.43	1.452	1.432	1.443	1.436	1.428	1.449	1.43	1.409	1.421	1.424	1.434	1.42	1.43	1.365	1.447	1.443	1.404	1.422	1.434	1.424	1.424	1.419	1.431	1.438	1.43
21:20:05	0	0.072	0.071	0.07	0.07	0.069	1.429	1.429	1.455	1.453	1.464	1.425	1.457	1.448	1.444	1.44	1.431	1.446	1.445	1.449	1.449	1.424	1.433	1.431	1.453	1.433	1.445	1.437	1.428	1.451	1.43	1.409	1.42	1.423	1.433	1.42	1.429	1.369	1.448	1.443	1.405	1.422	1.435	1.426	1.425	1.419	1.432	1.44	1.432
21:40:06	0	0.072	0.071	0.07	0.07	0.069	1.43	1.431	1.457	1.456	1.467	1.425	1.458	1.448	1.444	1.44	1.432	1.447	1.445	1.451	1.451	1.426	1.433	1.431	1.453	1.434	1.445	1.437	1.428	1.452	1.431	1.409	1.421	1.424	1.435	1.421	1.43	1.367	1.449	1.445	1.405	1.423	1.437	1.427	1.427	1.42	1.433	1.439	1.432
22:00:06	0	0.072	0.071	0.071	0.07	0.07	1.431	1.432	1.458	1.457	1.467	1.427	1.458	1.449	1.445	1.441	1.433	1.448	1.446	1.451	1.449	1.428	1.436	1.432	1.455	1.435	1.446	1.437	1.429	1.452	1.431	1.41	1.421	1.424	1.436	1.421	1.433	1.363	1.451	1.446	1.407	1.423	1.436	1.429	1.427	1.421	1.434	1.441	1.432
22:20:06
22:40:06
23:00:06
23:20:06
23:40:06
01 00:00:06
AVERAGED DATA
			51-58	59-66	67-74	75-82	83-90				LOG								LOG (filtered)
Time	Time (min)	BLANK																	WTH3	K18A	K18R	K18Q	K18L
00:00:00	0	0.0658	0.0662	#DIV/0!	#DIV/0!	#DIV/0!	#DIV/0!				-1.17914	#DIV/0!	#DIV/0!	#DIV/0!	#DIV/0!					#DIV/0!	#DIV/0!	#DIV/0!	#DIV/0!
00:20:06	20.1	0.0662	0.071	#DIV/0!	#DIV/0!	#DIV/0!	#DIV/0!				-1.14874	#DIV/0!	#DIV/0!	#DIV/0!	#DIV/0!					#DIV/0!	#DIV/0!	#DIV/0!	#DIV/0!
00:40:06	40.1	0.0664	0.0798	#DIV/0!	#DIV/0!	#DIV/0!	#DIV/0!				-1.098	#DIV/0!	#DIV/0!	#DIV/0!	#DIV/0!					#DIV/0!	#DIV/0!	#DIV/0!	#DIV/0!
01:00:06	60.1	0.0668	0.0856	#DIV/0!	#DIV/0!	#DIV/0!	#DIV/0!				-1.06753	#DIV/0!	#DIV/0!	#DIV/0!	#DIV/0!					#DIV/0!	#DIV/0!	#DIV/0!	#DIV/0!
01:20:06	80.1	0.067	0.0904	#DIV/0!	#DIV/0!	#DIV/0!	#DIV/0!				-1.04383	#DIV/0!	#DIV/0!	#DIV/0!	#DIV/0!					#DIV/0!	#DIV/0!	#DIV/0!	#DIV/0!
01:40:06	100.1	0.0674	0.0964	#DIV/0!	#DIV/0!	#DIV/0!	#DIV/0!				-1.01592	#DIV/0!	#DIV/0!	#DIV/0!	#DIV/0!					#DIV/0!	#DIV/0!	#DIV/0!	#DIV/0!
02:00:06	120.1	0.067	0.1036	#DIV/0!	#DIV/0!	#DIV/0!	#DIV/0!				-0.98464	#DIV/0!	#DIV/0!	#DIV/0!	#DIV/0!					#DIV/0!	#DIV/0!	#DIV/0!	#DIV/0!
02:20:06	140.1	0.0674	0.1124	#DIV/0!	#DIV/0!	#DIV/0!	#DIV/0!				-0.949234	#DIV/0!	#DIV/0!	#DIV/0!	#DIV/0!					#DIV/0!	#DIV/0!	#DIV/0!	#DIV/0!
02:40:06	160.1	0.0676	0.1228	#DIV/0!	#DIV/0!	#DIV/0!	#DIV/0!				-0.910802	#DIV/0!	#DIV/0!	#DIV/0!	#DIV/0!					#DIV/0!	#DIV/0!	#DIV/0!	#DIV/0!
03:00:06	180.1	0.0676	0.1358	#DIV/0!	#DIV/0!	#DIV/0!	#DIV/0!				-0.8671	#DIV/0!	#DIV/0!	#DIV/0!	#DIV/0!					#DIV/0!	#DIV/0!	#DIV/0!	#DIV/0!
03:20:06	200.1	0.0678	0.1482	#DIV/0!	#DIV/0!	#DIV/0!	#DIV/0!				-0.829152	#DIV/0!	#DIV/0!	#DIV/0!	#DIV/0!					#DIV/0!	#DIV/0!	#DIV/0!	#DIV/0!
03:40:06	220.1	0.0682	0.1642	#DIV/0!	#DIV/0!	#DIV/0!	#DIV/0!				-0.784627	#DIV/0!	#DIV/0!	#DIV/0!	#DIV/0!					#DIV/0!	#DIV/0!	#DIV/0!	#DIV/0!
04:00:06	240.1	0.0682	0.1824	#DIV/0!	#DIV/0!	#DIV/0!	#DIV/0!				-0.738975	#DIV/0!	#DIV/0!	#DIV/0!	#DIV/0!					#DIV/0!	#DIV/0!	#DIV/0!	#DIV/0!
04:20:06	260.1	0.068	0.1996	#DIV/0!	#DIV/0!	#DIV/0!	#DIV/0!				-0.699839	#DIV/0!	#DIV/0!	#DIV/0!	#DIV/0!					#DIV/0!	#DIV/0!	#DIV/0!	#DIV/0!
04:40:06	280.1	0.0682	0.218	#DIV/0!	#DIV/0!	#DIV/0!	#DIV/0!				-0.661544	#DIV/0!	#DIV/0!	#DIV/0!	#DIV/0!				-0.661544	#DIV/0!	#DIV/0!	#DIV/0!	#DIV/0!
05:00:06	300.1	0.0682	0.2424	#DIV/0!	#DIV/0!	#DIV/0!	#DIV/0!				-0.615467	#DIV/0!	#DIV/0!	#DIV/0!	#DIV/0!				-0.615467	#DIV/0!	#DIV/0!	#DIV/0!	#DIV/0!
05:20:06	320.1	0.0684	0.2704	#DIV/0!	#DIV/0!	#DIV/0!	#DIV/0!				-0.567993	#DIV/0!	#DIV/0!	#DIV/0!	#DIV/0!				-0.567993	#DIV/0!	#DIV/0!	#DIV/0!	#DIV/0!
05:40:06	340.1	0.0682	0.2978	#DIV/0!	#DIV/0!	#DIV/0!	#DIV/0!				-0.526075	#DIV/0!	#DIV/0!	#DIV/0!	#DIV/0!				-0.526075	#DIV/0!	#DIV/0!	#DIV/0!	#DIV/0!
06:00:06	360.1	0.0684	0.3276	#DIV/0!	#DIV/0!	#DIV/0!	#DIV/0!				-0.484656	#DIV/0!	#DIV/0!	#DIV/0!	#DIV/0!				-0.484656	#DIV/0!	#DIV/0!	#DIV/0!	#DIV/0!
06:20:06	380.1	0.0682	0.3604	#DIV/0!	#DIV/0!	#DIV/0!	#DIV/0!				-0.443215	#DIV/0!	#DIV/0!	#DIV/0!	#DIV/0!				-0.443215	#DIV/0!	#DIV/0!	#DIV/0!	#DIV/0!
06:40:06	400.1	0.068	0.3952	#DIV/0!	#DIV/0!	#DIV/0!	#DIV/0!				-0.403183	#DIV/0!	#DIV/0!	#DIV/0!	#DIV/0!				-0.403183	#DIV/0!	#DIV/0!	#DIV/0!	#DIV/0!
07:00:06	420.1	0.0678	0.4348	#DIV/0!	#DIV/0!	#DIV/0!	#DIV/0!				-0.36171	#DIV/0!	#DIV/0!	#DIV/0!	#DIV/0!				-0.36171	#DIV/0!	#DIV/0!	#DIV/0!	#DIV/0!
07:20:06	440.1	0.0678	0.4728	#DIV/0!	#DIV/0!	#DIV/0!	#DIV/0!				-0.325323	#DIV/0!	#DIV/0!	#DIV/0!	#DIV/0!				-0.325323	#DIV/0!	#DIV/0!	#DIV/0!	#DIV/0!
07:40:06	460.1	0.0674	0.5138	#DIV/0!	#DIV/0!	#DIV/0!	#DIV/0!				-0.289206	#DIV/0!	#DIV/0!	#DIV/0!	#DIV/0!				-0.289206	#DIV/0!	#DIV/0!	#DIV/0!	#DIV/0!
08:00:06	480.1	0.068	0.5582	#DIV/0!	#DIV/0!	#DIV/0!	#DIV/0!				-0.25321	#DIV/0!	#DIV/0!	#DIV/0!	#DIV/0!				-0.25321	#DIV/0!	#DIV/0!	#DIV/0!	#DIV/0!
08:20:06	500.1	0.0684	0.6044	#DIV/0!	#DIV/0!	#DIV/0!	#DIV/0!				-0.218676	#DIV/0!	#DIV/0!	#DIV/0!	#DIV/0!				-0.218676	#DIV/0!	#DIV/0!	#DIV/0!	#DIV/0!
08:40:06	520.1	0.0684	0.6494	#DIV/0!	#DIV/0!	#DIV/0!	#DIV/0!				-0.187488	#DIV/0!	#DIV/0!	#DIV/0!	#DIV/0!				-0.187488	#DIV/0!	#DIV/0!	#DIV/0!	#DIV/0!
09:00:06	540.1	0.068	0.695	#DIV/0!	#DIV/0!	#DIV/0!	#DIV/0!				-0.158015	#DIV/0!	#DIV/0!	#DIV/0!	#DIV/0!				-0.158015	#DIV/0!	#DIV/0!	#DIV/0!	#DIV/0!
09:20:06	560.1	0.0682	0.7398	#DIV/0!	#DIV/0!	#DIV/0!	#DIV/0!				-0.130886	#DIV/0!	#DIV/0!	#DIV/0!	#DIV/0!				-0.130886	#DIV/0!	#DIV/0!	#DIV/0!	#DIV/0!
09:40:06	580.1	0.0682	0.7838	#DIV/0!	#DIV/0!	#DIV/0!	#DIV/0!				-0.105795	#DIV/0!	#DIV/0!	#DIV/0!	#DIV/0!				-0.105795	#DIV/0!	#DIV/0!	#DIV/0!	#DIV/0!
10:00:06	600.1	0.0682	0.8292	#DIV/0!	#DIV/0!	#DIV/0!	#DIV/0!				-0.0813407	#DIV/0!	#DIV/0!	#DIV/0!	#DIV/0!					#DIV/0!	#DIV/0!	#DIV/0!	#DIV/0!
10:20:06	620.1	0.0684	0.8704	#DIV/0!	#DIV/0!	#DIV/0!	#DIV/0!				-0.0602811	#DIV/0!	#DIV/0!	#DIV/0!	#DIV/0!					#DIV/0!	#DIV/0!	#DIV/0!	#DIV/0!
10:40:06	640.1	0.0682	0.91	#DIV/0!	#DIV/0!	#DIV/0!	#DIV/0!				-0.0409586	#DIV/0!	#DIV/0!	#DIV/0!	#DIV/0!					#DIV/0!	#DIV/0!	#DIV/0!	#DIV/0!
11:00:06	660.1	0.0682	0.949	#DIV/0!	#DIV/0!	#DIV/0!	#DIV/0!				-0.0227338	#DIV/0!	#DIV/0!	#DIV/0!	#DIV/0!					#DIV/0!	#DIV/0!	#DIV/0!	#DIV/0!
11:20:06	680.1	0.0682	0.987	#DIV/0!	#DIV/0!	#DIV/0!	#DIV/0!				-0.00568285	#DIV/0!	#DIV/0!	#DIV/0!	#DIV/0!					#DIV/0!	#DIV/0!	#DIV/0!	#DIV/0!
11:40:06	700.1	0.0682	1.0234	#DIV/0!	#DIV/0!	#DIV/0!	#DIV/0!				0.0100454	#DIV/0!	#DIV/0!	#DIV/0!	#DIV/0!					#DIV/0!	#DIV/0!	#DIV/0!	#DIV/0!
12:00:06	720.1	0.0684	1.0572	#DIV/0!	#DIV/0!	#DIV/0!	#DIV/0!				0.0241572	#DIV/0!	#DIV/0!	#DIV/0!	#DIV/0!					#DIV/0!	#DIV/0!	#DIV/0!	#DIV/0!
12:20:06	740.1	0.0684	1.0888	#DIV/0!	#DIV/0!	#DIV/0!	#DIV/0!				0.0369481	#DIV/0!	#DIV/0!	#DIV/0!	#DIV/0!					#DIV/0!	#DIV/0!	#DIV/0!	#DIV/0!
12:40:06	760.1	0.0684	1.1172	#DIV/0!	#DIV/0!	#DIV/0!	#DIV/0!				0.0481309	#DIV/0!	#DIV/0!	#DIV/0!	#DIV/0!					#DIV/0!	#DIV/0!	#DIV/0!	#DIV/0!
13:00:06	780.1	0.0684	1.1456	#DIV/0!	#DIV/0!	#DIV/0!	#DIV/0!				0.059033	#DIV/0!	#DIV/0!	#DIV/0!	#DIV/0!					#DIV/0!	#DIV/0!	#DIV/0!	#DIV/0!
13:20:06	800.1	0.0684	1.1722	#DIV/0!	#DIV/0!	#DIV/0!	#DIV/0!				0.0690017	#DIV/0!	#DIV/0!	#DIV/0!	#DIV/0!					#DIV/0!	#DIV/0!	#DIV/0!	#DIV/0!
13:40:05	820.083	0.0684	1.1978	#DIV/0!	#DIV/0!	#DIV/0!	#DIV/0!				0.0783843	#DIV/0!	#DIV/0!	#DIV/0!	#DIV/0!					#DIV/0!	#DIV/0!	#DIV/0!	#DIV/0!
14:00:06	840.1	0.0686	1.2194	#DIV/0!	#DIV/0!	#DIV/0!	#DIV/0!				0.0861462	#DIV/0!	#DIV/0!	#DIV/0!	#DIV/0!					#DIV/0!	#DIV/0!	#DIV/0!	#DIV/0!
14:20:06	860.1	0.0684	1.241	#DIV/0!	#DIV/0!	#DIV/0!	#DIV/0!				0.0937718	#DIV/0!	#DIV/0!	#DIV/0!	#DIV/0!					#DIV/0!	#DIV/0!	#DIV/0!	#DIV/0!
14:40:06	880.1	0.0684	1.2596	#DIV/0!	#DIV/0!	#DIV/0!	#DIV/0!				0.100233	#DIV/0!	#DIV/0!	#DIV/0!	#DIV/0!					#DIV/0!	#DIV/0!	#DIV/0!	#DIV/0!
15:00:06	900.1	0.0688	1.2772	#DIV/0!	#DIV/0!	#DIV/0!	#DIV/0!				0.106259	#DIV/0!	#DIV/0!	#DIV/0!	#DIV/0!					#DIV/0!	#DIV/0!	#DIV/0!	#DIV/0!
15:20:06	920.1	0.0686	1.2932	#DIV/0!	#DIV/0!	#DIV/0!	#DIV/0!				0.111666	#DIV/0!	#DIV/0!	#DIV/0!	#DIV/0!					#DIV/0!	#DIV/0!	#DIV/0!	#DIV/0!
15:40:06	940.1	0.0688	1.307	#DIV/0!	#DIV/0!	#DIV/0!	#DIV/0!				0.116276	#DIV/0!	#DIV/0!	#DIV/0!	#DIV/0!					#DIV/0!	#DIV/0!	#DIV/0!	#DIV/0!
16:00:06	960.1	0.069	1.3226	#DIV/0!	#DIV/0!	#DIV/0!	#DIV/0!				0.121429	#DIV/0!	#DIV/0!	#DIV/0!	#DIV/0!					#DIV/0!	#DIV/0!	#DIV/0!	#DIV/0!
16:20:06	980.1	0.069	1.3326	#DIV/0!	#DIV/0!	#DIV/0!	#DIV/0!				0.1247	#DIV/0!	#DIV/0!	#DIV/0!	#DIV/0!					#DIV/0!	#DIV/0!	#DIV/0!	#DIV/0!
16:40:06	1000.1	0.069	1.3432	#DIV/0!	#DIV/0!	#DIV/0!	#DIV/0!				0.128141	#DIV/0!	#DIV/0!	#DIV/0!	#DIV/0!					#DIV/0!	#DIV/0!	#DIV/0!	#DIV/0!
17:00:06	1020.1	0.069	1.351	#DIV/0!	#DIV/0!	#DIV/0!	#DIV/0!				0.130655	#DIV/0!	#DIV/0!	#DIV/0!	#DIV/0!					#DIV/0!	#DIV/0!	#DIV/0!	#DIV/0!
17:20:06	1040.1	0.0692	1.357	#DIV/0!	#DIV/0!	#DIV/0!	#DIV/0!				0.13258	#DIV/0!	#DIV/0!	#DIV/0!	#DIV/0!					#DIV/0!	#DIV/0!	#DIV/0!	#DIV/0!
17:40:06	1060.1	0.069	1.36	#DIV/0!	#DIV/0!	#DIV/0!	#DIV/0!				0.133539	#DIV/0!	#DIV/0!	#DIV/0!	#DIV/0!					#DIV/0!	#DIV/0!	#DIV/0!	#DIV/0!
18:00:06	1080.1	0.0692	1.3628	#DIV/0!	#DIV/0!	#DIV/0!	#DIV/0!				0.134432	#DIV/0!	#DIV/0!	#DIV/0!	#DIV/0!					#DIV/0!	#DIV/0!	#DIV/0!	#DIV/0!
18:20:06	1100.1	0.0698	1.363	#DIV/0!	#DIV/0!	#DIV/0!	#DIV/0!				0.134496	#DIV/0!	#DIV/0!	#DIV/0!	#DIV/0!					#DIV/0!	#DIV/0!	#DIV/0!	#DIV/0!
18:40:06	1120.1	0.0696	1.3636	#DIV/0!	#DIV/0!	#DIV/0!	#DIV/0!				0.134687	#DIV/0!	#DIV/0!	#DIV/0!	#DIV/0!					#DIV/0!	#DIV/0!	#DIV/0!	#DIV/0!
19:00:06	1140.1	0.0698	1.3646	#DIV/0!	#DIV/0!	#DIV/0!	#DIV/0!				0.135005	#DIV/0!	#DIV/0!	#DIV/0!	#DIV/0!					#DIV/0!	#DIV/0!	#DIV/0!	#DIV/0!
19:20:06	1160.1	0.0696	1.366	#DIV/0!	#DIV/0!	#DIV/0!	#DIV/0!				0.135451	#DIV/0!	#DIV/0!	#DIV/0!	#DIV/0!					#DIV/0!	#DIV/0!	#DIV/0!	#DIV/0!
19:40:06	1180.1	0.07	1.3666	#DIV/0!	#DIV/0!	#DIV/0!	#DIV/0!				0.135641	#DIV/0!	#DIV/0!	#DIV/0!	#DIV/0!					#DIV/0!	#DIV/0!	#DIV/0!	#DIV/0!
20:00:06	1200.1	0.07	1.3662	#DIV/0!	#DIV/0!	#DIV/0!	#DIV/0!				0.135514	#DIV/0!	#DIV/0!	#DIV/0!	#DIV/0!					#DIV/0!	#DIV/0!	#DIV/0!	#DIV/0!
20:20:06	1220.1	0.07	1.3654	#DIV/0!	#DIV/0!	#DIV/0!	#DIV/0!				0.13526	#DIV/0!	#DIV/0!	#DIV/0!	#DIV/0!					#DIV/0!	#DIV/0!	#DIV/0!	#DIV/0!
20:40:06	1240.1	0.0702	1.365	#DIV/0!	#DIV/0!	#DIV/0!	#DIV/0!				0.135133	#DIV/0!	#DIV/0!	#DIV/0!	#DIV/0!					#DIV/0!	#DIV/0!	#DIV/0!	#DIV/0!
21:00:06	1260.1	0.0702	1.3658	#DIV/0!	#DIV/0!	#DIV/0!	#DIV/0!				0.135387	#DIV/0!	#DIV/0!	#DIV/0!	#DIV/0!					#DIV/0!	#DIV/0!	#DIV/0!	#DIV/0!
21:20:05	1280.08	0.0704	1.3666	#DIV/0!	#DIV/0!	#DIV/0!	#DIV/0!				0.135641	#DIV/0!	#DIV/0!	#DIV/0!	#DIV/0!					#DIV/0!	#DIV/0!	#DIV/0!	#DIV/0!
21:40:06	1300.1	0.0704	1.3672	#DIV/0!	#DIV/0!	#DIV/0!	#DIV/0!				0.135832	#DIV/0!	#DIV/0!	#DIV/0!	#DIV/0!					#DIV/0!	#DIV/0!	#DIV/0!	#DIV/0!
22:00:06	1320.1	0.0708	1.3676	#DIV/0!	#DIV/0!	#DIV/0!	#DIV/0!				0.135959	#DIV/0!	#DIV/0!	#DIV/0!	#DIV/0!					#DIV/0!	#DIV/0!	#DIV/0!	#DIV/0!
22:20:06	1340.1	#DIV/0!	#DIV/0!	#DIV/0!	#DIV/0!	#DIV/0!	#DIV/0!				#DIV/0!	#DIV/0!	#DIV/0!	#DIV/0!	#DIV/0!				#DIV/0!	#DIV/0!	#DIV/0!	#DIV/0!	#DIV/0!
22:40:06	1360.1	#DIV/0!	#DIV/0!	#DIV/0!	#DIV/0!	#DIV/0!	#DIV/0!
23:00:06	1380.1	#DIV/0!	#DIV/0!	#DIV/0!	#DIV/0!	#DIV/0!	#DIV/0!											SLOPE	#DIV/0!	#DIV/0!	#DIV/0!	#DIV/0!	#DIV/0!
23:20:06	1400.1	#DIV/0!	#DIV/0!	#DIV/0!	#DIV/0!	#DIV/0!	#DIV/0!												WTH3	K18A	K18R	K18Q	K18L
23:40:06	1420.1	#DIV/0!	#DIV/0!	#DIV/0!	#DIV/0!	#DIV/0!	#DIV/0!											Doubling Time (min)	#DIV/0!	#DIV/0!	#DIV/0!	#DIV/0!	#DIV/0!
01 00:00:06	#VALUE!	#DIV/0!	#DIV/0!	#DIV/0!	#DIV/0!	#DIV/0!	#DIV/0!
										LOG2	-0.69897
										LOG8	-0.09691
[truncated: 152 more columns]

## Sheet: 4. Fig. 1D - analysed
			BY4741 + pRS315	BY4741 + pRS315	BY4741 + pRS315	BY4741 + pRS315	BY4741 + pRS315	BY4741 + pRS315	BY4741 + pRS315	BY4741 + pRS315	BY4741 + pRS315	BY4741 + pRS315	SNR52::URA3 + pRS315	SNR52::URA3 + pRS315	SNR52::URA3 + pRS315	SNR52::URA3 + pRS315	SNR52::URA3 + pRS315	SNR52::URA3 + pRS315	SNR52::URA3 + pRS315	SNR52::URA3 + pRS315	SNR52::URA3 + pRS315	SNR52::URA3 + pRS315	SNR52::URA3 + dCas9	SNR52::URA3 + dCas9	SNR52::URA3 + dCas9	SNR52::URA3 + dCas9	SNR52::URA3 + dCas9	SNR52::URA3 + dCas9	SNR52::URA3 + dCas9	SNR52::URA3 + dCas9	SNR52::URA3 + dCas9	SNR52::URA3 + dCas9	SNR52::AS1A + dCas9	SNR52::AS1A + dCas9	SNR52::AS1A + dCas9	SNR52::AS1A + dCas9	SNR52::AS1A + dCas9	SNR52::AS1A + dCas9	SNR52::AS1A + dCas9	SNR52::AS1A + dCas9	SNR52::AS1A + dCas9	SNR52::AS1A + dCas9	SNR52::AS1M + dCas9	SNR52::AS1M + dCas9	SNR52::AS1M + dCas9	SNR52::AS1M + dCas9	SNR52::AS1M + dCas9	SNR52::AS1M + dCas9	SNR52::AS1M + dCas9
Time	Time (min)	AV. BLANK 1-5	Well 106	Well 107	Well 108	Well 109	Well 110	Well 111	Well 112	Well 113	Well 114	Well 115	Well 116	Well 117	Well 118	Well 119	Well 120	Well 121	Well 122	Well 123	Well 124	Well 125	Well 126	Well 127	Well 128	Well 129	Well 130	Well 131	Well 132	Well 133	Well 134	Well 135	Well 136	Well 137	Well 138	Well 139	Well 140	Well 141	Well 142	Well 143	Well 144	Well 145	Well 146	Well 147	Well 148	Well 149	Well 150	Well 151	Well 152
00:00:00	0	0.0658	0.116	0.115	0.116	0.117	0.118	0.117	0.116	0.116	0.118	0.119	0.114	0.116	0.115	0.117	0.12	0.122	0.117	0.116	0.116	0.115	0.125	0.126	0.127	0.126	0.125	0.123	0.125	0.126	0.125	0.127	0.129	0.13	0.133	0.131	0.137	0.137	0.131	0.133	0.13	0.131	0.134	0.131	0.131	0.131	0.131	0.132	0.132
00:20:06	20.1	0.0662	0.124	0.123	0.122	0.123	0.125	0.125	0.125	0.125	0.125	0.126	0.12	0.122	0.122	0.124	0.127	0.13	0.127	0.123	0.122	0.121	0.129	0.13	0.131	0.131	0.131	0.133	0.131	0.13	0.128	0.133	0.134	0.133	0.137	0.137	0.141	0.152	0.141	0.139	0.134	0.132	0.138	0.136	0.135	0.136	0.136	0.14	0.139
00:40:06	40.1	0.0664	0.129	0.129	0.129	0.13	0.133	0.133	0.131	0.13	0.131	0.132	0.127	0.127	0.131	0.133	0.135	0.138	0.132	0.128	0.127	0.125	0.135	0.135	0.137	0.139	0.138	0.138	0.137	0.135	0.133	0.134	0.142	0.141	0.144	0.144	0.147	0.165	0.151	0.144	0.141	0.139	0.146	0.145	0.144	0.145	0.145	0.15	0.147
01:00:06	60.1	0.0668	0.132	0.133	0.135	0.135	0.139	0.138	0.135	0.133	0.135	0.136	0.13	0.132	0.135	0.138	0.14	0.143	0.137	0.131	0.13	0.129	0.139	0.139	0.141	0.143	0.142	0.143	0.143	0.139	0.137	0.139	0.148	0.149	0.153	0.152	0.157	0.171	0.157	0.15	0.146	0.144	0.152	0.152	0.15	0.153	0.154	0.155	0.153
01:20:06	80.1	0.067	0.136	0.137	0.138	0.141	0.144	0.141	0.138	0.136	0.139	0.141	0.134	0.136	0.14	0.143	0.145	0.148	0.139	0.134	0.133	0.132	0.142	0.143	0.146	0.148	0.146	0.147	0.146	0.142	0.141	0.142	0.151	0.154	0.16	0.159	0.162	0.178	0.162	0.156	0.151	0.15	0.158	0.157	0.157	0.159	0.16	0.162	0.158
01:40:06	100.1	0.0674	0.139	0.14	0.142	0.144	0.147	0.146	0.143	0.141	0.143	0.145	0.137	0.139	0.144	0.147	0.15	0.153	0.144	0.139	0.137	0.135	0.147	0.147	0.15	0.152	0.151	0.151	0.15	0.147	0.145	0.148	0.157	0.158	0.166	0.164	0.168	0.188	0.171	0.165	0.158	0.157	0.165	0.163	0.163	0.166	0.168	0.167	0.164
02:00:06	120.1	0.067	0.145	0.146	0.148	0.148	0.151	0.151	0.147	0.145	0.148	0.15	0.143	0.144	0.149	0.151	0.154	0.159	0.149	0.144	0.142	0.14	0.15	0.152	0.154	0.156	0.155	0.155	0.154	0.15	0.148	0.151	0.163	0.163	0.171	0.17	0.174	0.195	0.177	0.17	0.164	0.164	0.17	0.167	0.168	0.17	0.173	0.174	0.172
02:20:06	140.1	0.0674	0.151	0.152	0.154	0.156	0.159	0.158	0.155	0.153	0.155	0.158	0.151	0.152	0.157	0.16	0.164	0.169	0.157	0.151	0.15	0.148	0.159	0.161	0.162	0.164	0.163	0.164	0.162	0.157	0.155	0.158	0.172	0.173	0.182	0.181	0.185	0.212	0.188	0.179	0.174	0.172	0.179	0.177	0.177	0.181	0.183	0.186	0.18
02:40:06	160.1	0.0676	0.16	0.162	0.164	0.164	0.168	0.168	0.163	0.161	0.164	0.167	0.159	0.16	0.166	0.17	0.174	0.181	0.168	0.161	0.159	0.156	0.171	0.172	0.172	0.176	0.175	0.172	0.171	0.168	0.167	0.168	0.182	0.184	0.193	0.191	0.195	0.224	0.201	0.19	0.184	0.183	0.19	0.186	0.187	0.191	0.193	0.198	0.191
03:00:06	180.1	0.0676	0.17	0.17	0.174	0.174	0.179	0.179	0.174	0.171	0.174	0.178	0.169	0.171	0.178	0.182	0.186	0.191	0.178	0.17	0.169	0.166	0.18	0.181	0.182	0.185	0.185	0.182	0.181	0.177	0.176	0.177	0.194	0.195	0.204	0.203	0.205	0.236	0.215	0.204	0.197	0.195	0.203	0.199	0.199	0.203	0.204	0.21	0.205
03:20:06	200.1	0.0678	0.184	0.183	0.185	0.187	0.192	0.195	0.185	0.184	0.19	0.193	0.181	0.183	0.19	0.194	0.199	0.206	0.192	0.183	0.182	0.178	0.191	0.192	0.193	0.196	0.196	0.194	0.192	0.189	0.187	0.188	0.209	0.209	0.22	0.218	0.22	0.25	0.228	0.216	0.209	0.207	0.214	0.21	0.212	0.217	0.218	0.223	0.218
03:40:06	220.1	0.0682	0.195	0.199	0.202	0.202	0.208	0.208	0.203	0.198	0.201	0.204	0.194	0.197	0.207	0.212	0.216	0.219	0.205	0.197	0.194	0.191	0.204	0.205	0.205	0.209	0.209	0.206	0.205	0.202	0.2	0.201	0.224	0.226	0.236	0.234	0.235	0.265	0.245	0.232	0.224	0.223	0.231	0.228	0.228	0.231	0.235	0.242	0.234
04:00:06	240.1	0.0682	0.211	0.214	0.217	0.22	0.226	0.225	0.218	0.218	0.223	0.225	0.21	0.211	0.22	0.225	0.229	0.235	0.221	0.211	0.211	0.208	0.22	0.221	0.222	0.227	0.227	0.222	0.22	0.216	0.214	0.215	0.239	0.24	0.254	0.25	0.253	0.287	0.263	0.25	0.241	0.239	0.246	0.242	0.244	0.249	0.251	0.261	0.253
04:20:06	260.1	0.068	0.231	0.236	0.237	0.238	0.245	0.243	0.239	0.233	0.239	0.244	0.227	0.23	0.239	0.245	0.25	0.253	0.24	0.229	0.227	0.224	0.239	0.24	0.24	0.245	0.245	0.238	0.237	0.234	0.232	0.232	0.257	0.258	0.272	0.271	0.274	0.309	0.283	0.265	0.256	0.256	0.262	0.258	0.261	0.267	0.272	0.28	0.272
04:40:06	280.1	0.0682	0.254	0.254	0.256	0.256	0.264	0.265	0.257	0.255	0.26	0.262	0.247	0.249	0.257	0.263	0.268	0.272	0.259	0.247	0.248	0.243	0.255	0.256	0.256	0.262	0.262	0.256	0.254	0.25	0.248	0.25	0.275	0.275	0.291	0.289	0.295	0.33	0.304	0.288	0.28	0.277	0.279	0.275	0.277	0.286	0.291	0.299	0.291
05:00:06	300.1	0.0682	0.274	0.276	0.278	0.279	0.288	0.292	0.282	0.277	0.284	0.286	0.265	0.269	0.28	0.287	0.293	0.294	0.279	0.267	0.265	0.261	0.273	0.274	0.274	0.281	0.279	0.275	0.273	0.268	0.266	0.266	0.295	0.296	0.311	0.31	0.318	0.355	0.328	0.312	0.302	0.299	0.304	0.299	0.298	0.304	0.31	0.321	0.313
05:20:06	320.1	0.0684	0.303	0.304	0.306	0.307	0.316	0.319	0.308	0.304	0.312	0.316	0.292	0.295	0.307	0.314	0.319	0.32	0.306	0.295	0.293	0.289	0.299	0.301	0.299	0.306	0.306	0.3	0.298	0.294	0.292	0.292	0.322	0.324	0.343	0.339	0.346	0.381	0.355	0.338	0.328	0.327	0.334	0.327	0.329	0.332	0.336	0.348	0.342
05:40:06	340.1	0.0682	0.332	0.334	0.335	0.335	0.344	0.345	0.338	0.333	0.342	0.346	0.32	0.322	0.335	0.341	0.345	0.348	0.331	0.322	0.321	0.316	0.324	0.325	0.326	0.332	0.331	0.326	0.323	0.319	0.316	0.317	0.357	0.358	0.376	0.369	0.372	0.41	0.386	0.368	0.358	0.359	0.366	0.361	0.359	0.363	0.365	0.373	0.369
06:00:06	360.1	0.0684	0.363	0.367	0.368	0.366	0.376	0.376	0.369	0.363	0.374	0.379	0.348	0.351	0.365	0.372	0.375	0.378	0.361	0.35	0.35	0.345	0.354	0.355	0.356	0.363	0.362	0.355	0.352	0.347	0.344	0.345	0.391	0.391	0.41	0.402	0.399	0.436	0.418	0.401	0.39	0.391	0.397	0.392	0.39	0.392	0.392	0.4	0.398
06:20:06	380.1	0.0682	0.4	0.403	0.403	0.401	0.41	0.41	0.404	0.4	0.411	0.416	0.381	0.383	0.399	0.406	0.409	0.41	0.394	0.384	0.383	0.378	0.384	0.386	0.388	0.395	0.393	0.388	0.383	0.378	0.375	0.376	0.427	0.427	0.445	0.434	0.427	0.471	0.453	0.434	0.425	0.427	0.43	0.424	0.422	0.424	0.425	0.434	0.431
06:40:06	400.1	0.068	0.439	0.439	0.439	0.435	0.443	0.445	0.442	0.44	0.451	0.456	0.419	0.422	0.435	0.442	0.445	0.446	0.431	0.42	0.42	0.415	0.421	0.421	0.424	0.431	0.428	0.423	0.419	0.413	0.41	0.411	0.463	0.464	0.481	0.47	0.462	0.509	0.49	0.47	0.462	0.462	0.465	0.46	0.456	0.459	0.459	0.467	0.466
07:00:06	420.1	0.0678	0.478	0.48	0.48	0.474	0.484	0.485	0.483	0.48	0.492	0.497	0.457	0.46	0.475	0.481	0.485	0.484	0.468	0.457	0.458	0.452	0.457	0.458	0.46	0.468	0.465	0.46	0.457	0.45	0.447	0.448	0.505	0.505	0.524	0.512	0.503	0.549	0.53	0.511	0.501	0.502	0.505	0.499	0.496	0.499	0.499	0.507	0.505
07:20:06	440.1	0.0678	0.522	0.524	0.521	0.513	0.526	0.525	0.523	0.523	0.536	0.539	0.5	0.502	0.516	0.522	0.526	0.524	0.507	0.499	0.5	0.494	0.499	0.501	0.502	0.51	0.506	0.499	0.498	0.493	0.489	0.489	0.545	0.546	0.567	0.554	0.543	0.592	0.571	0.55	0.541	0.543	0.545	0.539	0.535	0.538	0.538	0.545	0.542
07:40:06	460.1	0.0674	0.565	0.567	0.565	0.557	0.57	0.568	0.567	0.565	0.58	0.583	0.54	0.542	0.558	0.564	0.568	0.566	0.551	0.54	0.542	0.535	0.538	0.54	0.542	0.55	0.545	0.54	0.539	0.532	0.53	0.53	0.589	0.589	0.608	0.594	0.583	0.632	0.614	0.594	0.583	0.586	0.586	0.58	0.577	0.578	0.577	0.583	0.583
08:00:06	480.1	0.068	0.611	0.613	0.611	0.602	0.616	0.616	0.615	0.614	0.629	0.631	0.587	0.589	0.605	0.612	0.615	0.612	0.596	0.587	0.591	0.581	0.587	0.589	0.59	0.598	0.591	0.585	0.585	0.579	0.576	0.577	0.632	0.633	0.656	0.639	0.627	0.68	0.661	0.639	0.629	0.631	0.63	0.624	0.62	0.622	0.621	0.63	0.628
08:20:06	500.1	0.0684	0.662	0.664	0.66	0.651	0.665	0.665	0.665	0.664	0.679	0.682	0.638	0.639	0.654	0.661	0.666	0.662	0.644	0.637	0.639	0.63	0.637	0.638	0.639	0.647	0.64	0.634	0.635	0.627	0.625	0.625	0.68	0.681	0.702	0.686	0.675	0.729	0.709	0.686	0.675	0.677	0.678	0.671	0.666	0.669	0.669	0.676	0.674
08:40:06	520.1	0.0684	0.71	0.711	0.708	0.698	0.713	0.714	0.711	0.71	0.726	0.729	0.683	0.685	0.701	0.709	0.714	0.709	0.69	0.683	0.685	0.676	0.684	0.686	0.687	0.693	0.687	0.681	0.682	0.675	0.673	0.672	0.727	0.728	0.75	0.734	0.722	0.774	0.755	0.732	0.721	0.723	0.723	0.716	0.712	0.714	0.714	0.721	0.719
09:00:06	540.1	0.068	0.758	0.761	0.756	0.747	0.763	0.761	0.761	0.761	0.777	0.781	0.732	0.734	0.752	0.758	0.76	0.756	0.741	0.732	0.735	0.725	0.732	0.734	0.733	0.742	0.734	0.726	0.729	0.721	0.722	0.72	0.77	0.773	0.793	0.778	0.766	0.822	0.802	0.776	0.766	0.772	0.767	0.758	0.758	0.756	0.758	0.767	0.764
09:20:06	560.1	0.0682	0.808	0.81	0.807	0.797	0.812	0.81	0.808	0.808	0.824	0.828	0.784	0.783	0.802	0.81	0.81	0.807	0.788	0.782	0.785	0.774	0.78	0.784	0.783	0.792	0.785	0.776	0.778	0.771	0.77	0.768	0.817	0.822	0.844	0.826	0.813	0.865	0.848	0.825	0.814	0.815	0.814	0.807	0.804	0.805	0.804	0.811	0.809
09:40:06	580.1	0.0682	0.856	0.857	0.855	0.847	0.861	0.858	0.855	0.856	0.871	0.875	0.832	0.833	0.851	0.858	0.861	0.854	0.837	0.829	0.834	0.823	0.829	0.832	0.832	0.841	0.833	0.824	0.826	0.819	0.818	0.816	0.862	0.867	0.888	0.871	0.858	0.909	0.892	0.868	0.857	0.86	0.857	0.85	0.849	0.85	0.849	0.855	0.853
10:00:06	600.1	0.0682	0.904	0.906	0.905	0.895	0.908	0.905	0.904	0.904	0.919	0.922	0.881	0.883	0.9	0.908	0.908	0.904	0.886	0.879	0.882	0.873	0.879	0.88	0.881	0.889	0.883	0.871	0.872	0.866	0.866	0.863	0.909	0.913	0.933	0.914	0.9	0.952	0.937	0.913	0.902	0.904	0.902	0.896	0.894	0.894	0.894	0.9	0.899
10:20:06	620.1	0.0684	0.948	0.949	0.946	0.939	0.953	0.948	0.947	0.947	0.963	0.966	0.926	0.928	0.946	0.953	0.953	0.947	0.931	0.924	0.928	0.918	0.922	0.925	0.925	0.932	0.927	0.915	0.917	0.91	0.911	0.907	0.948	0.954	0.974	0.956	0.94	0.992	0.978	0.954	0.945	0.946	0.944	0.938	0.936	0.937	0.936	0.941	0.94
10:40:06	640.1	0.0682	0.99	0.991	0.991	0.981	0.996	0.989	0.989	0.99	1.003	1.006	0.971	0.972	0.989	0.997	0.995	0.991	0.975	0.971	0.972	0.963	0.966	0.968	0.969	0.976	0.97	0.959	0.961	0.954	0.954	0.952	0.99	0.997	1.014	0.998	0.981	1.033	1.019	0.994	0.984	0.985	0.984	0.978	0.976	0.978	0.977	0.98	0.979
11:00:06	660.1	0.0682	1.031	1.031	1.029	1.022	1.036	1.03	1.031	1.032	1.044	1.047	1.015	1.016	1.033	1.04	1.038	1.033	1.017	1.012	1.016	1.007	1.008	1.011	1.012	1.019	1.014	1.001	1.004	0.997	0.996	0.994	1.029	1.037	1.052	1.035	1.018	1.07	1.059	1.035	1.025	1.025	1.025	1.017	1.016	1.015	1.016	1.017	1.018
11:20:06	680.1	0.0682	1.069	1.069	1.068	1.062	1.075	1.068	1.069	1.07	1.082	1.083	1.057	1.057	1.073	1.081	1.078	1.073	1.057	1.054	1.056	1.048	1.048	1.05	1.049	1.056	1.051	1.041	1.044	1.036	1.036	1.034	1.068	1.076	1.091	1.074	1.055	1.109	1.096	1.074	1.062	1.063	1.061	1.055	1.053	1.055	1.053	1.056	1.056
11:40:06	700.1	0.0682	1.107	1.105	1.104	1.098	1.112	1.105	1.106	1.107	1.118	1.12	1.094	1.098	1.112	1.119	1.116	1.108	1.096	1.093	1.097	1.089	1.087	1.088	1.089	1.096	1.09	1.078	1.081	1.074	1.075	1.072	1.102	1.108	1.129	1.111	1.093	1.139	1.129	1.109	1.1	1.097	1.097	1.092	1.091	1.089	1.088	1.094	1.09
12:00:06	720.1	0.0684	1.14	1.138	1.138	1.133	1.146	1.138	1.143	1.143	1.153	1.154	1.13	1.134	1.148	1.155	1.151	1.144	1.133	1.129	1.132	1.125	1.121	1.122	1.124	1.131	1.125	1.115	1.117	1.112	1.112	1.108	1.137	1.141	1.16	1.144	1.126	1.17	1.162	1.142	1.133	1.132	1.13	1.124	1.123	1.121	1.123	1.126	1.124
12:20:06	740.1	0.0684	1.172	1.172	1.172	1.167	1.178	1.171	1.178	1.179	1.186	1.186	1.165	1.169	1.183	1.19	1.184	1.175	1.167	1.163	1.169	1.159	1.155	1.156	1.156	1.164	1.158	1.146	1.149	1.143	1.145	1.141	1.169	1.173	1.192	1.176	1.157	1.199	1.193	1.173	1.165	1.164	1.162	1.157	1.154	1.154	1.153	1.157	1.157
12:40:06	760.1	0.0684	1.202	1.201	1.203	1.197	1.206	1.2	1.211	1.211	1.216	1.217	1.196	1.2	1.212	1.22	1.212	1.205	1.197	1.193	1.199	1.19	1.184	1.187	1.186	1.194	1.188	1.175	1.18	1.174	1.175	1.172	1.198	1.2	1.221	1.205	1.186	1.228	1.222	1.203	1.195	1.19	1.189	1.185	1.184	1.183	1.183	1.186	1.185
13:00:06	780.1	0.0684	1.232	1.229	1.23	1.225	1.235	1.229	1.244	1.239	1.244	1.245	1.225	1.229	1.241	1.249	1.241	1.234	1.226	1.222	1.227	1.22	1.212	1.214	1.214	1.221	1.215	1.201	1.206	1.201	1.202	1.2	1.225	1.225	1.249	1.231	1.212	1.253	1.249	1.231	1.223	1.22	1.217	1.213	1.212	1.212	1.212	1.214	1.215
13:20:06	800.1	0.0684	1.259	1.256	1.258	1.257	1.264	1.258	1.273	1.269	1.271	1.273	1.253	1.257	1.269	1.276	1.273	1.261	1.256	1.251	1.258	1.249	1.241	1.243	1.242	1.251	1.243	1.228	1.234	1.229	1.233	1.228	1.252	1.224	1.276	1.26	1.239	1.277	1.276	1.258	1.25	1.245	1.244	1.238	1.239	1.239	1.238	1.24	1.242
13:40:05	820.083	0.0684	1.285	1.282	1.284	1.284	1.29	1.283	1.3	1.294	1.297	1.297	1.278	1.282	1.295	1.302	1.296	1.285	1.28	1.276	1.286	1.274	1.267	1.268	1.267	1.278	1.269	1.253	1.26	1.256	1.26	1.254	1.276	1.246	1.301	1.287	1.263	1.301	1.3	1.282	1.275	1.271	1.269	1.266	1.264	1.266	1.264	1.265	1.268
14:00:06	840.1	0.0686	1.307	1.305	1.306	1.306	1.315	1.304	1.323	1.317	1.318	1.32	1.302	1.306	1.317	1.323	1.318	1.305	1.302	1.299	1.309	1.297	1.29	1.291	1.29	1.3	1.291	1.275	1.282	1.277	1.284	1.278	1.299	1.279	1.321	1.308	1.284	1.321	1.322	1.306	1.297	1.291	1.293	1.289	1.288	1.29	1.287	1.286	1.29
14:20:06	860.1	0.0684	1.327	1.325	1.326	1.326	1.336	1.324	1.346	1.338	1.338	1.339	1.321	1.325	1.337	1.343	1.336	1.324	1.323	1.319	1.329	1.318	1.31	1.312	1.311	1.323	1.312	1.297	1.304	1.3	1.306	1.298	1.318	1.26	1.342	1.327	1.303	1.339	1.341	1.325	1.317	1.312	1.313	1.311	1.308	1.311	1.307	1.305	1.311
14:40:06	880.1	0.0684	1.343	1.342	1.344	1.344	1.354	1.341	1.363	1.355	1.354	1.355	1.337	1.343	1.353	1.359	1.352	1.34	1.34	1.336	1.348	1.335	1.328	1.33	1.327	1.339	1.329	1.313	1.321	1.32	1.325	1.316	1.335	1.322	1.357	1.344	1.319	1.354	1.356	1.339	1.335	1.331	1.33	1.327	1.328	1.326	1.324	1.324	1.332
15:00:06	900.1	0.0688	1.36	1.358	1.365	1.364	1.375	1.358	1.382	1.372	1.371	1.372	1.354	1.363	1.371	1.377	1.372	1.358	1.357	1.354	1.365	1.354	1.355	1.35	1.348	1.359	1.348	1.331	1.338	1.336	1.346	1.336	1.353	1.224	1.376	1.362	1.337	1.368	1.372	1.356	1.353	1.348	1.349	1.348	1.346	1.351	1.343	1.342	1.35
15:20:06	920.1	0.0686	1.374	1.375	1.381	1.383	1.391	1.37	1.397	1.386	1.386	1.386	1.371	1.379	1.384	1.391	1.385	1.37	1.372	1.368	1.38	1.368	1.371	1.367	1.362	1.376	1.364	1.346	1.355	1.354	1.362	1.353	1.369	1.303	1.389	1.379	1.35	1.382	1.387	1.371	1.367	1.363	1.364	1.364	1.362	1.367	1.358	1.357	1.365
15:40:06	940.1	0.0688	1.385	1.385	1.394	1.394	1.4	1.383	1.409	1.399	1.397	1.397	1.382	1.392	1.397	1.403	1.395	1.382	1.385	1.381	1.394	1.38	1.384	1.38	1.376	1.388	1.377	1.355	1.367	1.368	1.376	1.367	1.381	1.343	1.402	1.39	1.362	1.392	1.397	1.384	1.38	1.375	1.378	1.378	1.377	1.382	1.374	1.371	1.379
16:00:06	960.1	0.069	1.398	1.397	1.414	1.407	1.414	1.394	1.421	1.41	1.408	1.409	1.394	1.404	1.409	1.414	1.406	1.393	1.395	1.393	1.406	1.393	1.398	1.394	1.39	1.403	1.391	1.371	1.381	1.381	1.39	1.379	1.393	1.355	1.414	1.405	1.373	1.401	1.409	1.394	1.391	1.385	1.389	1.393	1.39	1.394	1.384	1.383	1.403
16:20:06	980.1	0.069	1.406	1.405	1.425	1.417	1.426	1.402	1.431	1.42	1.417	1.418	1.403	1.415	1.419	1.423	1.415	1.401	1.404	1.403	1.421	1.403	1.409	1.404	1.398	1.412	1.399	1.382	1.391	1.393	1.4	1.39	1.402	1.318	1.423	1.414	1.382	1.408	1.418	1.402	1.4	1.396	1.4	1.404	1.4	1.407	1.393	1.393	1.414
16:40:06	1000.1	0.069	1.415	1.415	1.436	1.427	1.437	1.411	1.44	1.429	1.426	1.425	1.411	1.425	1.426	1.431	1.425	1.408	1.413	1.411	1.432	1.413	1.417	1.415	1.407	1.423	1.408	1.39	1.4	1.401	1.41	1.4	1.411	1.342	1.43	1.423	1.389	1.415	1.423	1.409	1.408	1.404	1.413	1.414	1.409	1.417	1.403	1.402	1.426
17:00:06	1020.1	0.069	1.422	1.425	1.443	1.434	1.443	1.417	1.447	1.436	1.435	1.432	1.418	1.431	1.432	1.437	1.43	1.414	1.421	1.418	1.439	1.419	1.424	1.422	1.415	1.43	1.416	1.397	1.407	1.41	1.419	1.407	1.418	1.372	1.436	1.428	1.394	1.419	1.429	1.415	1.415	1.412	1.42	1.422	1.418	1.424	1.41	1.409	1.435
17:20:06	1040.1	0.0692	1.426	1.429	1.448	1.442	1.451	1.422	1.451	1.442	1.438	1.435	1.422	1.436	1.436	1.442	1.436	1.417	1.424	1.422	1.442	1.424	1.432	1.428	1.421	1.439	1.422	1.403	1.412	1.415	1.423	1.411	1.422	1.344	1.442	1.435	1.399	1.423	1.433	1.419	1.419	1.414	1.426	1.429	1.423	1.432	1.416	1.417	1.44
17:40:06	1060.1	0.069	1.428	1.431	1.452	1.446	1.456	1.425	1.453	1.444	1.441	1.439	1.425	1.439	1.439	1.444	1.439	1.419	1.425	1.425	1.445	1.425	1.435	1.431	1.425	1.441	1.425	1.407	1.416	1.419	1.427	1.414	1.424	1.344	1.444	1.438	1.401	1.425	1.436	1.423	1.422	1.416	1.429	1.434	1.426	1.436	1.419	1.418	1.444
18:00:06	1080.1	0.0692	1.43	1.433	1.454	1.449	1.458	1.428	1.455	1.446	1.443	1.438	1.426	1.44	1.439	1.446	1.44	1.421	1.428	1.427	1.447	1.428	1.437	1.433	1.426	1.444	1.427	1.409	1.418	1.421	1.432	1.417	1.425	1.357	1.444	1.437	1.402	1.425	1.438	1.423	1.423	1.418	1.43	1.437	1.429	1.438	1.42	1.421	1.447
18:20:06	1100.1	0.0698	1.43	1.432	1.454	1.452	1.461	1.428	1.456	1.445	1.441	1.438	1.427	1.442	1.441	1.447	1.444	1.422	1.429	1.428	1.448	1.428	1.438	1.434	1.427	1.445	1.429	1.41	1.418	1.423	1.434	1.418	1.426	1.368	1.444	1.438	1.403	1.424	1.437	1.422	1.422	1.417	1.431	1.436	1.43	1.438	1.422	1.421	1.449
18:40:06	1120.1	0.0696	1.431	1.432	1.454	1.452	1.46	1.428	1.456	1.445	1.443	1.438	1.428	1.443	1.441	1.447	1.443	1.423	1.431	1.428	1.449	1.43	1.439	1.434	1.428	1.445	1.429	1.409	1.419	1.423	1.433	1.419	1.427	1.36	1.445	1.439	1.404	1.425	1.436	1.422	1.422	1.418	1.431	1.439	1.429	1.438	1.423	1.42	1.452
19:00:06	1140.1	0.0698	1.43	1.431	1.454	1.451	1.46	1.427	1.456	1.445	1.445	1.439	1.428	1.442	1.441	1.447	1.442	1.422	1.43	1.429	1.45	1.429	1.439	1.435	1.428	1.447	1.429	1.41	1.419	1.422	1.434	1.419	1.427	1.384	1.445	1.438	1.403	1.425	1.436	1.422	1.422	1.417	1.431	1.437	1.429	1.437	1.421	1.421	1.457
19:20:06	1160.1	0.0696	1.43	1.432	1.455	1.454	1.465	1.428	1.459	1.447	1.443	1.439	1.428	1.444	1.443	1.448	1.447	1.423	1.432	1.429	1.451	1.431	1.441	1.436	1.428	1.45	1.431	1.412	1.421	1.424	1.435	1.42	1.428	1.358	1.446	1.441	1.404	1.425	1.437	1.426	1.424	1.418	1.433	1.439	1.431	1.441	1.423	1.421	1.46
19:40:06	1180.1	0.07	1.431	1.433	1.455	1.454	1.465	1.428	1.459	1.447	1.444	1.439	1.429	1.446	1.442	1.448	1.446	1.423	1.432	1.429	1.451	1.431	1.442	1.437	1.429	1.45	1.431	1.412	1.422	1.424	1.435	1.42	1.428	1.357	1.446	1.442	1.405	1.425	1.437	1.425	1.424	1.419	1.434	1.439	1.43	1.44	1.423	1.422	1.461
20:00:06	1200.1	0.07	1.431	1.433	1.456	1.454	1.464	1.426	1.458	1.447	1.444	1.439	1.43	1.444	1.443	1.449	1.446	1.425	1.434	1.43	1.451	1.433	1.442	1.436	1.429	1.45	1.431	1.411	1.421	1.424	1.436	1.421	1.428	1.364	1.446	1.441	1.403	1.423	1.435	1.424	1.424	1.419	1.433	1.44	1.432	1.442	1.424	1.421	1.461
20:20:06	1220.1	0.07	1.428	1.43	1.454	1.453	1.463	1.425	1.457	1.446	1.442	1.437	1.428	1.444	1.442	1.448	1.444	1.423	1.431	1.429	1.451	1.431	1.443	1.436	1.428	1.45	1.43	1.411	1.421	1.423	1.434	1.419	1.427	1.363	1.445	1.44	1.403	1.423	1.435	1.426	1.423	1.417	1.432	1.439	1.429	1.439	1.421	1.42	1.461
20:40:06	1240.1	0.0702	1.428	1.429	1.454	1.452	1.462	1.426	1.456	1.446	1.442	1.439	1.43	1.445	1.443	1.448	1.447	1.424	1.433	1.43	1.451	1.431	1.442	1.435	1.428	1.448	1.43	1.409	1.42	1.422	1.434	1.419	1.428	1.366	1.446	1.44	1.403	1.421	1.432	1.424	1.423	1.417	1.432	1.439	1.43	1.44	1.422	1.42	1.462
21:00:06	1260.1	0.0702	1.429	1.429	1.455	1.453	1.464	1.426	1.457	1.447	1.443	1.438	1.43	1.445	1.444	1.449	1.447	1.424	1.434	1.43	1.452	1.432	1.443	1.436	1.428	1.449	1.43	1.409	1.421	1.424	1.434	1.42	1.43	1.365	1.447	1.443	1.404	1.422	1.434	1.424	1.424	1.419	1.431	1.438	1.43	1.44	1.423	1.42	1.464
21:20:05	1280.08	0.0704	1.429	1.429	1.455	1.453	1.464	1.425	1.457	1.448	1.444	1.44	1.431	1.446	1.445	1.449	1.449	1.424	1.433	1.431	1.453	1.433	1.445	1.437	1.428	1.451	1.43	1.409	1.42	1.423	1.433	1.42	1.429	1.369	1.448	1.443	1.405	1.422	1.435	1.426	1.425	1.419	1.432	1.44	1.432	1.442	1.423	1.421	1.466
21:40:06	1300.1	0.0704	1.43	1.431	1.457	1.456	1.467	1.425	1.458	1.448	1.444	1.44	1.432	1.447	1.445	1.451	1.451	1.426	1.433	1.431	1.453	1.434	1.445	1.437	1.428	1.452	1.431	1.409	1.421	1.424	1.435	1.421	1.43	1.367	1.449	1.445	1.405	1.423	1.437	1.427	1.427	1.42	1.433	1.439	1.432	1.441	1.423	1.422	1.466
22:00:06	1320.1	0.0708	1.431	1.432	1.458	1.457	1.467	1.427	1.458	1.449	1.445	1.441	1.433	1.448	1.446	1.451	1.449	1.428	1.436	1.432	1.455	1.435	1.446	1.437	1.429	1.452	1.431	1.41	1.421	1.424	1.436	1.421	1.433	1.363	1.451	1.446	1.407	1.423	1.436	1.429	1.427	1.421	1.434	1.441	1.432	1.444	1.424	1.422	1.469
22:20:06	1340.1	#DIV/0!
22:40:06	1360.1	#DIV/0!
23:00:06	1380.1	#DIV/0!
23:20:06	1400.1	#DIV/0!
23:40:06	1420.1	#DIV/0!
01 00:00:06	#VALUE!	#DIV/0!
MINUS BLANK
Time (min)	BY4741 + pRS315	BY4741 + pRS315	BY4741 + pRS315	BY4741 + pRS315	BY4741 + pRS315	BY4741 + pRS315	BY4741 + pRS315	BY4741 + pRS315	BY4741 + pRS315	BY4741 + pRS315	SNR52::URA3 + pRS315	SNR52::URA3 + pRS315	SNR52::URA3 + pRS315	SNR52::URA3 + pRS315	SNR52::URA3 + pRS315	SNR52::URA3 + pRS315	SNR52::URA3 + pRS315	SNR52::URA3 + pRS315	SNR52::URA3 + pRS315	SNR52::URA3 + pRS315	SNR52::URA3 + dCas9	SNR52::URA3 + dCas9	SNR52::URA3 + dCas9	SNR52::URA3 + dCas9	SNR52::URA3 + dCas9	SNR52::URA3 + dCas9	SNR52::URA3 + dCas9	SNR52::URA3 + dCas9	SNR52::URA3 + dCas9	SNR52::URA3 + dCas9	SNR52::AS1A + dCas9	SNR52::AS1A + dCas9	SNR52::AS1A + dCas9	SNR52::AS1A + dCas9	SNR52::AS1A + dCas9	SNR52::AS1A + dCas9	SNR52::AS1A + dCas9	SNR52::AS1A + dCas9	SNR52::AS1A + dCas9	SNR52::AS1A + dCas9	SNR52::AS1M + dCas9	SNR52::AS1M + dCas9	SNR52::AS1M + dCas9	SNR52::AS1M + dCas9	SNR52::AS1M + dCas9	SNR52::AS1M + dCas9	SNR52::AS1M + dCas9	SNR52::AS1M + dCas9	SNR52::AS1M + dCas9
0.133333	0.0502	0.0492	0.0502	0.0512	0.0522	0.0512	0.0502	0.0502	0.0522	0.0532	0.0482	0.0502	0.0492	0.0512	0.0542	0.0562	0.0512	0.0502	0.0502	0.0492	0.0592	0.0602	0.0612	0.0602	0.0592	0.0572	0.0592	0.0602	0.0592	0.0612	0.0632	0.0642	0.0672	0.0652	0.0712	0.0712	0.0652	0.0672	0.0642	0.0652	0.0682	0.0652	0.0652	0.0652	0.0652	0.0662	0.0662	0.0652	0.0662
20.1	0.0578	0.0568	0.0558	0.0568	0.0588	0.0588	0.0588	0.0588	0.0588	0.0598	0.0538	0.0558	0.0558	0.0578	0.0608	0.0638	0.0608	0.0568	0.0558	0.0548	0.0628	0.0638	0.0648	0.0648	0.0648	0.0668	0.0648	0.0638	0.0618	0.0668	0.0678	0.0668	0.0708	0.0708	0.0748	0.0858	0.0748	0.0728	0.0678	0.0658	0.0718	0.0698	0.0688	0.0698	0.0698	0.0738	0.0728	0.0698	0.0678
40.1	0.0626	0.0626	0.0626	0.0636	0.0666	0.0666	0.0646	0.0636	0.0646	0.0656	0.0606	0.0606	0.0646	0.0666	0.0686	0.0716	0.0656	0.0616	0.0606	0.0586	0.0686	0.0686	0.0706	0.0726	0.0716	0.0716	0.0706	0.0686	0.0666	0.0676	0.0756	0.0746	0.0776	0.0776	0.0806	0.0986	0.0846	0.0776	0.0746	0.0726	0.0796	0.0786	0.0776	0.0786	0.0786	0.0836	0.0806	0.0796	0.0756
60.1	0.0652	0.0662	0.0682	0.0682	0.0722	0.0712	0.0682	0.0662	0.0682	0.0692	0.0632	0.0652	0.0682	0.0712	0.0732	0.0762	0.0702	0.0642	0.0632	0.0622	0.0722	0.0722	0.0742	0.0762	0.0752	0.0762	0.0762	0.0722	0.0702	0.0722	0.0812	0.0822	0.0862	0.0852	0.0902	0.1042	0.0902	0.0832	0.0792	0.0772	0.0852	0.0852	0.0832	0.0862	0.0872	0.0882	0.0862	0.0852	0.0822
80.1	0.069	0.07	0.071	0.074	0.077	0.074	0.071	0.069	0.072	0.074	0.067	0.069	0.073	0.076	0.078	0.081	0.072	0.067	0.066	0.065	0.075	0.076	0.079	0.081	0.079	0.08	0.079	0.075	0.074	0.075	0.084	0.087	0.093	0.092	0.095	0.111	0.095	0.089	0.084	0.083	0.091	0.09	0.09	0.092	0.093	0.095	0.091	0.088	0.087
100.1	0.0716	0.0726	0.0746	0.0766	0.0796	0.0786	0.0756	0.0736	0.0756	0.0776	0.0696	0.0716	0.0766	0.0796	0.0826	0.0856	0.0766	0.0716	0.0696	0.0676	0.0796	0.0796	0.0826	0.0846	0.0836	0.0836	0.0826	0.0796	0.0776	0.0806	0.0896	0.0906	0.0986	0.0966	0.1006	0.1206	0.1036	0.0976	0.0906	0.0896	0.0976	0.0956	0.0956	0.0986	0.1006	0.0996	0.0966	0.0946	0.0946
120.1	0.078	0.079	0.081	0.081	0.084	0.084	0.08	0.078	0.081	0.083	0.076	0.077	0.082	0.084	0.087	0.092	0.082	0.077	0.075	0.073	0.083	0.085	0.087	0.089	0.088	0.088	0.087	0.083	0.081	0.084	0.096	0.096	0.104	0.103	0.107	0.128	0.11	0.103	0.097	0.097	0.103	0.1	0.101	0.103	0.106	0.107	0.105	0.101	0.101
140.1	0.0836	0.0846	0.0866	0.0886	0.0916	0.0906	0.0876	0.0856	0.0876	0.0906	0.0836	0.0846	0.0896	0.0926	0.0966	0.1016	0.0896	0.0836	0.0826	0.0806	0.0916	0.0936	0.0946	0.0966	0.0956	0.0966	0.0946	0.0896	0.0876	0.0906	0.1046	0.1056	0.1146	0.1136	0.1176	0.1446	0.1206	0.1116	0.1066	0.1046	0.1116	0.1096	0.1096	0.1136	0.1156	0.1186	0.1126	0.1096	0.1086
160.1	0.0924	0.0944	0.0964	0.0964	0.1004	0.1004	0.0954	0.0934	0.0964	0.0994	0.0914	0.0924	0.0984	0.1024	0.1064	0.1134	0.1004	0.0934	0.0914	0.0884	0.1034	0.1044	0.1044	0.1084	0.1074	0.1044	0.1034	0.1004	0.0994	0.1004	0.1144	0.1164	0.1254	0.1234	0.1274	0.1564	0.1334	0.1224	0.1164	0.1154	0.1224	0.1184	0.1194	0.1234	0.1254	0.1304	0.1234	0.1194	0.1184
180.1	0.1024	0.1024	0.1064	0.1064	0.1114	0.1114	0.1064	0.1034	0.1064	0.1104	0.1014	0.1034	0.1104	0.1144	0.1184	0.1234	0.1104	0.1024	0.1014	0.0984	0.1124	0.1134	0.1144	0.1174	0.1174	0.1144	0.1134	0.1094	0.1084	0.1094	0.1264	0.1274	0.1364	0.1354	0.1374	0.1684	0.1474	0.1364	0.1294	0.1274	0.1354	0.1314	0.1314	0.1354	0.1364	0.1424	0.1374	0.1344	0.1304
200.1	0.1162	0.1152	0.1172	0.1192	0.1242	0.1272	0.1172	0.1162	0.1222	0.1252	0.1132	0.1152	0.1222	0.1262	0.1312	0.1382	0.1242	0.1152	0.1142	0.1102	0.1232	0.1242	0.1252	0.1282	0.1282	0.1262	0.1242	0.1212	0.1192	0.1202	0.1412	0.1412	0.1522	0.1502	0.1522	0.1822	0.1602	0.1482	0.1412	0.1392	0.1462	0.1422	0.1442	0.1492	0.1502	0.1552	0.1502	0.1462	0.1422
220.1	0.1268	0.1308	0.1338	0.1338	0.1398	0.1398	0.1348	0.1298	0.1328	0.1358	0.1258	0.1288	0.1388	0.1438	0.1478	0.1508	0.1368	0.1288	0.1258	0.1228	0.1358	0.1368	0.1368	0.1408	0.1408	0.1378	0.1368	0.1338	0.1318	0.1328	0.1558	0.1578	0.1678	0.1658	0.1668	0.1968	0.1768	0.1638	0.1558	0.1548	0.1628	0.1598	0.1598	0.1628	0.1668	0.1738	0.1658	0.1608	0.1578
240.1	0.1428	0.1458	0.1488	0.1518	0.1578	0.1568	0.1498	0.1498	0.1548	0.1568	0.1418	0.1428	0.1518	0.1568	0.1608	0.1668	0.1528	0.1428	0.1428	0.1398	0.1518	0.1528	0.1538	0.1588	0.1588	0.1538	0.1518	0.1478	0.1458	0.1468	0.1708	0.1718	0.1858	0.1818	0.1848	0.2188	0.1948	0.1818	0.1728	0.1708	0.1778	0.1738	0.1758	0.1808	0.1828	0.1928	0.1848	0.1788	0.1748
260.1	0.163	0.168	0.169	0.17	0.177	0.175	0.171	0.165	0.171	0.176	0.159	0.162	0.171	0.177	0.182	0.185	0.172	0.161	0.159	0.156	0.171	0.172	0.172	0.177	0.177	0.17	0.169	0.166	0.164	0.164	0.189	0.19	0.204	0.203	0.206	0.241	0.215	0.197	0.188	0.188	0.194	0.19	0.193	0.199	0.204	0.212	0.204	0.194	0.191
280.1	0.1858	0.1858	0.1878	0.1878	0.1958	0.1968	0.1888	0.1868	0.1918	0.1938	0.1788	0.1808	0.1888	0.1948	0.1998	0.2038	0.1908	0.1788	0.1798	0.1748	0.1868	0.1878	0.1878	0.1938	0.1938	0.1878	0.1858	0.1818	0.1798	0.1818	0.2068	0.2068	0.2228	0.2208	0.2268	0.2618	0.2358	0.2198	0.2118	0.2088	0.2108	0.2068	0.2088	0.2178	0.2228	0.2308	0.2228	0.2138	0.2088
300.1	0.2058	0.2078	0.2098	0.2108	0.2198	0.2238	0.2138	0.2088	0.2158	0.2178	0.1968	0.2008	0.2118	0.2188	0.2248	0.2258	0.2108	0.1988	0.1968	0.1928	0.2048	0.2058	0.2058	0.2128	0.2108	0.2068	0.2048	0.1998	0.1978	0.1978	0.2268	0.2278	0.2428	0.2418	0.2498	0.2868	0.2598	0.2438	0.2338	0.2308	0.2358	0.2308	0.2298	0.2358	0.2418	0.2528	0.2448	0.2418	0.2358
320.1	0.2346	0.2356	0.2376	0.2386	0.2476	0.2506	0.2396	0.2356	0.2436	0.2476	0.2236	0.2266	0.2386	0.2456	0.2506	0.2516	0.2376	0.2266	0.2246	0.2206	0.2306	0.2326	0.2306	0.2376	0.2376	0.2316	0.2296	0.2256	0.2236	0.2236	0.2536	0.2556	0.2746	0.2706	0.2776	0.3126	0.2866	0.2696	0.2596	0.2586	0.2656	0.2586	0.2606	0.2636	0.2676	0.2796	0.2736	0.2666	0.2626
340.1	0.2638	0.2658	0.2668	0.2668	0.2758	0.2768	0.2698	0.2648	0.2738	0.2778	0.2518	0.2538	0.2668	0.2728	0.2768	0.2798	0.2628	0.2538	0.2528	0.2478	0.2558	0.2568	0.2578	0.2638	0.2628	0.2578	0.2548	0.2508	0.2478	0.2488	0.2888	0.2898	0.3078	0.3008	0.3038	0.3418	0.3178	0.2998	0.2898	0.2908	0.2978	0.2928	0.2908	0.2948	0.2968	0.3048	0.3008	0.2958	0.2898
360.1	0.2946	0.2986	0.2996	0.2976	0.3076	0.3076	0.3006	0.2946	0.3056	0.3106	0.2796	0.2826	0.2966	0.3036	0.3066	0.3096	0.2926	0.2816	0.2816	0.2766	0.2856	0.2866	0.2876	0.2946	0.2936	0.2866	0.2836	0.2786	0.2756	0.2766	0.3226	0.3226	0.3416	0.3336	0.3306	0.3676	0.3496	0.3326	0.3216	0.3226	0.3286	0.3236	0.3216	0.3236	0.3236	0.3316	0.3296	0.3256	0.3206
380.1	0.3318	0.3348	0.3348	0.3328	0.3418	0.3418	0.3358	0.3318	0.3428	0.3478	0.3128	0.3148	0.3308	0.3378	0.3408	0.3418	0.3258	0.3158	0.3148	0.3098	0.3158	0.3178	0.3198	0.3268	0.3248	0.3198	0.3148	0.3098	0.3068	0.3078	0.3588	0.3588	0.3768	0.3658	0.3588	0.4028	0.3848	0.3658	0.3568	0.3588	0.3618	0.3558	0.3538	0.3558	0.3568	0.3658	0.3628	0.3588	0.3528
400.1	0.371	0.371	0.371	0.367	0.375	0.377	0.374	0.372	0.383	0.388	0.351	0.354	0.367	0.374	0.377	0.378	0.363	0.352	0.352	0.347	0.353	0.353	0.356	0.363	0.36	0.355	0.351	0.345	0.342	0.343	0.395	0.396	0.413	0.402	0.394	0.441	0.422	0.402	0.394	0.394	0.397	0.392	0.388	0.391	0.391	0.399	0.398	0.394	0.387
420.1	0.4102	0.4122	0.4122	0.4062	0.4162	0.4172	0.4152	0.4122	0.4242	0.4292	0.3892	0.3922	0.4072	0.4132	0.4172	0.4162	0.4002	0.3892	0.3902	0.3842	0.3892	0.3902	0.3922	0.4002	0.3972	0.3922	0.3892	0.3822	0.3792	0.3802	0.4372	0.4372	0.4562	0.4442	0.4352	0.4812	0.4622	0.4432	0.4332	0.4342	0.4372	0.4312	0.4282	0.4312	0.4312	0.4392	0.4372	0.4332	0.4262
440.1	0.4542	0.4562	0.4532	0.4452	0.4582	0.4572	0.4552	0.4552	0.4682	0.4712	0.4322	0.4342	0.4482	0.4542	0.4582	0.4562	0.4392	0.4312	0.4322	0.4262	0.4312	0.4332	0.4342	0.4422	0.4382	0.4312	0.4302	0.4252	0.4212	0.4212	0.4772	0.4782	0.4992	0.4862	0.4752	0.5242	0.5032	0.4822	0.4732	0.4752	0.4772	0.4712	0.4672	0.4702	0.4702	0.4772	0.4742	0.4712	0.4642
460.1	0.4976	0.4996	0.4976	0.4896	0.5026	0.5006	0.4996	0.4976	0.5126	0.5156	0.4726	0.4746	0.4906	0.4966	0.5006	0.4986	0.4836	0.4726	0.4746	0.4676	0.4706	0.4726	0.4746	0.4826	0.4776	0.4726	0.4716	0.4646	0.4626	0.4626	0.5216	0.5216	0.5406	0.5266	0.5156	0.5646	0.5466	0.5266	0.5156	0.5186	0.5186	0.5126	0.5096	0.5106	0.5096	0.5156	0.5156	0.5116	0.5056
480.1	0.543	0.545	0.543	0.534	0.548	0.548	0.547	0.546	0.561	0.563	0.519	0.521	0.537	0.544	0.547	0.544	0.528	0.519	0.523	0.513	0.519	0.521	0.522	0.53	0.523	0.517	0.517	0.511	0.508	0.509	0.564	0.565	0.588	0.571	0.559	0.612	0.593	0.571	0.561	0.563	0.562	0.556	0.552	0.554	0.553	0.562	0.56	0.555	0.55
500.1	0.5936	0.5956	0.5916	0.5826	0.5966	0.5966	0.5966	0.5956	0.6106	0.6136	0.5696	0.5706	0.5856	0.5926	0.5976	0.5936	0.5756	0.5686	0.5706	0.5616	0.5686	0.5696	0.5706	0.5786	0.5716	0.5656	0.5666	0.5586	0.5566	0.5566	0.6116	0.6126	0.6336	0.6176	0.6066	0.6606	0.6406	0.6176	0.6066	0.6086	0.6096	0.6026	0.5976	0.6006	0.6006	0.6076	0.6056	0.6026	0.5956
520.1	0.6416	0.6426	0.6396	0.6296	0.6446	0.6456	0.6426	0.6416	0.6576	0.6606	0.6146	0.6166	0.6326	0.6406	0.6456	0.6406	0.6216	0.6146	0.6166	0.6076	0.6156	0.6176	0.6186	0.6246	0.6186	0.6126	0.6136	0.6066	0.6046	0.6036	0.6586	0.6596	0.6816	0.6656	0.6536	0.7056	0.6866	0.6636	0.6526	0.6546	0.6546	0.6476	0.6436	0.6456	0.6456	0.6526	0.6506	0.6476	0.6406
540.1	0.69	0.693	0.688	0.679	0.695	0.693	0.693	0.693	0.709	0.713	0.664	0.666	0.684	0.69	0.692	0.688	0.673	0.664	0.667	0.657	0.664	0.666	0.665	0.674	0.666	0.658	0.661	0.653	0.654	0.652	0.702	0.705	0.725	0.71	0.698	0.754	0.734	0.708	0.698	0.704	0.699	0.69	0.69	0.688	0.69	0.699	0.696	0.693	0.686
560.1	0.7398	0.7418	0.7388	0.7288	0.7438	0.7418	0.7398	0.7398	0.7558	0.7598	0.7158	0.7148	0.7338	0.7418	0.7418	0.7388	0.7198	0.7138	0.7168	0.7058	0.7118	0.7158	0.7148	0.7238	0.7168	0.7078	0.7098	0.7028	0.7018	0.6998	0.7488	0.7538	0.7758	0.7578	0.7448	0.7968	0.7798	0.7568	0.7458	0.7468	0.7458	0.7388	0.7358	0.7368	0.7358	0.7428	0.7408	0.7388	0.7308
580.1	0.7878	0.7888	0.7868	0.7788	0.7928	0.7898	0.7868	0.7878	0.8028	0.8068	0.7638	0.7648	0.7828	0.7898	0.7928	0.7858	0.7688	0.7608	0.7658	0.7548	0.7608	0.7638	0.7638	0.7728	0.7648	0.7558	0.7578	0.7508	0.7498	0.7478	0.7938	0.7988	0.8198	0.8028	0.7898	0.8408	0.8238	0.7998	0.7888	0.7918	0.7888	0.7818	0.7808	0.7818	0.7808	0.7868	0.7848	0.7828	0.7748
600.1	0.8358	0.8378	0.8368	0.8268	0.8398	0.8368	0.8358	0.8358	0.8508	0.8538	0.8128	0.8148	0.8318	0.8398	0.8398	0.8358	0.8178	0.8108	0.8138	0.8048	0.8108	0.8118	0.8128	0.8208	0.8148	0.8028	0.8038	0.7978	0.7978	0.7948	0.8408	0.8448	0.8648	0.8458	0.8318	0.8838	0.8688	0.8448	0.8338	0.8358	0.8338	0.8278	0.8258	0.8258	0.8258	0.8318	0.8308	0.8278	0.8208
620.1	0.8796	0.8806	0.8776	0.8706	0.8846	0.8796	0.8786	0.8786	0.8946	0.8976	0.8576	0.8596	0.8776	0.8846	0.8846	0.8786	0.8626	0.8556	0.8596	0.8496	0.8536	0.8566	0.8566	0.8636	0.8586	0.8466	0.8486	0.8416	0.8426	0.8386	0.8796	0.8856	0.9056	0.8876	0.8716	0.9236	0.9096	0.8856	0.8766	0.8776	0.8756	0.8696	0.8676	0.8686	0.8676	0.8726	0.8716	0.8686	0.8616
640.1	0.9218	0.9228	0.9228	0.9128	0.9278	0.9208	0.9208	0.9218	0.9348	0.9378	0.9028	0.9038	0.9208	0.9288	0.9268	0.9228	0.9068	0.9028	0.9038	0.8948	0.8978	0.8998	0.9008	0.9078	0.9018	0.8908	0.8928	0.8858	0.8858	0.8838	0.9218	0.9288	0.9458	0.9298	0.9128	0.9648	0.9508	0.9258	0.9158	0.9168	0.9158	0.9098	0.9078	0.9098	0.9088	0.9118	0.9108	0.9078	0.9018
660.1	0.9628	0.9628	0.9608	0.9538	0.9678	0.9618	0.9628	0.9638	0.9758	0.9788	0.9468	0.9478	0.9648	0.9718	0.9698	0.9648	0.9488	0.9438	0.9478	0.9388	0.9398	0.9428	0.9438	0.9508	0.9458	0.9328	0.9358	0.9288	0.9278	0.9258	0.9608	0.9688	0.9838	0.9668	0.9498	1.0018	0.9908	0.9668	0.9568	0.9568	0.9568	0.9488	0.9478	0.9468	0.9478	0.9488	0.9498	0.9478	0.9418
680.1	1.0008	1.0008	0.9998	0.9938	1.0068	0.9998	1.0008	1.0018	1.0138	1.0148	0.9888	0.9888	1.0048	1.0128	1.0098	1.0048	0.9888	0.9858	0.9878	0.9798	0.9798	0.9818	0.9808	0.9878	0.9828	0.9728	0.9758	0.9678	0.9678	0.9658	0.9998	1.0078	1.0228	1.0058	0.9868	1.0408	1.0278	1.0058	0.9938	0.9948	0.9928	0.9868	0.9848	0.9868	0.9848	0.9878	0.9878	0.9868	0.9778
700.1	1.0388	1.0368	1.0358	1.0298	1.0438	1.0368	1.0378	1.0388	1.0498	1.0518	1.0258	1.0298	1.0438	1.0508	1.0478	1.0398	1.0278	1.0248	1.0288	1.0208	1.0188	1.0198	1.0208	1.0278	1.0218	1.0098	1.0128	1.0058	1.0068	1.0038	1.0338	1.0398	1.0608	1.0428	1.0248	1.0708	1.0608	1.0408	1.0318	1.0288	1.0288	1.0238	1.0228	1.0208	1.0198	1.0258	1.0218	1.0228	1.0148
720.1	1.0716	1.0696	1.0696	1.0646	1.0776	1.0696	1.0746	1.0746	1.0846	1.0856	1.0616	1.0656	1.0796	1.0866	1.0826	1.0756	1.0646	1.0606	1.0636	1.0566	1.0526	1.0536	1.0556	1.0626	1.0566	1.0466	1.0486	1.0436	1.0436	1.0396	1.0686	1.0726	1.0916	1.0756	1.0576	1.1016	1.0936	1.0736	1.0646	1.0636	1.0616	1.0556	1.0546	1.0526	1.0546	1.0576	1.0556	1.0566	1.0496
740.1	1.1036	1.1036	1.1036	1.0986	1.1096	1.1026	1.1096	1.1106	1.1176	1.1176	1.0966	1.1006	1.1146	1.1216	1.1156	1.1066	1.0986	1.0946	1.1006	1.0906	1.0866	1.0876	1.0876	1.0956	1.0896	1.0776	1.0806	1.0746	1.0766	1.0726	1.1006	1.1046	1.1236	1.1076	1.0886	1.1306	1.1246	1.1046	1.0966	1.0956	1.0936	1.0886	1.0856	1.0856	1.0846	1.0886	1.0886	1.0876	1.0816
760.1	1.1336	1.1326	1.1346	1.1286	1.1376	1.1316	1.1426	1.1426	1.1476	1.1486	1.1276	1.1316	1.1436	1.1516	1.1436	1.1366	1.1286	1.1246	1.1306	1.1216	1.1156	1.1186	1.1176	1.1256	1.1196	1.1066	1.1116	1.1056	1.1066	1.1036	1.1296	1.1316	1.1526	1.1366	1.1176	1.1596	1.1536	1.1346	1.1266	1.1216	1.1206	1.1166	1.1156	1.1146	1.1146	1.1176	1.1166	1.1166	1.1086
780.1	1.1636	1.1606	1.1616	1.1566	1.1666	1.1606	1.1756	1.1706	1.1756	1.1766	1.1566	1.1606	1.1726	1.1806	1.1726	1.1656	1.1576	1.1536	1.1586	1.1516	1.1436	1.1456	1.1456	1.1526	1.1466	1.1326	1.1376	1.1326	1.1336	1.1316	1.1566	1.1566	1.1806	1.1626	1.1436	1.1846	1.1806	1.1626	1.1546	1.1516	1.1486	1.1446	1.1436	1.1436	1.1436	1.1456	1.1466	1.1446	1.1386
800.1	1.1906	1.1876	1.1896	1.1886	1.1956	1.1896	1.2046	1.2006	1.2026	1.2046	1.1846	1.1886	1.2006	1.2076	1.2046	1.1926	1.1876	1.1826	1.1896	1.1806	1.1726	1.1746	1.1736	1.1826	1.1746	1.1596	1.1656	1.1606	1.1646	1.1596	1.1836	1.1556	1.2076	1.1916	1.1706	1.2086	1.2076	1.1896	1.1816	1.1766	1.1756	1.1696	1.1706	1.1706	1.1696	1.1716	1.1736	1.1716	1.1646
820.1	1.2166	1.2136	1.2156	1.2156	1.2216	1.2146	1.2316	1.2256	1.2286	1.2286	1.2096	1.2136	1.2266	1.2336	1.2276	1.2166	1.2116	1.2076	1.2176	1.2056	1.1986	1.1996	1.1986	1.2096	1.2006	1.1846	1.1916	1.1876	1.1916	1.1856	1.2076	1.1776	1.2326	1.2186	1.1946	1.2326	1.2316	1.2136	1.2066	1.2026	1.2006	1.1976	1.1956	1.1976	1.1956	1.1966	1.1996	1.1976	1.1896
840.1	1.2384	1.2364	1.2374	1.2374	1.2464	1.2354	1.2544	1.2484	1.2494	1.2514	1.2334	1.2374	1.2484	1.2544	1.2494	1.2364	1.2334	1.2304	1.2404	1.2284	1.2214	1.2224	1.2214	1.2314	1.2224	1.2064	1.2134	1.2084	1.2154	1.2094	1.2304	1.2104	1.2524	1.2394	1.2154	1.2524	1.2534	1.2374	1.2284	1.2224	1.2244	1.2204	1.2194	1.2214	1.2184	1.2174	1.2214	1.2184	1.2124
860.1	1.2586	1.2566	1.2576	1.2576	1.2676	1.2556	1.2776	1.2696	1.2696	1.2706	1.2526	1.2566	1.2686	1.2746	1.2676	1.2556	1.2546	1.2506	1.2606	1.2496	1.2416	1.2436	1.2426	1.2546	1.2436	1.2286	1.2356	1.2316	1.2376	1.2296	1.2496	1.1916	1.2736	1.2586	1.2346	1.2706	1.2726	1.2566	1.2486	1.2436	1.2446	1.2426	1.2396	1.2426	1.2386	1.2366	1.2426	1.2426	1.2346
880.1	1.2746	1.2736	1.2756	1.2756	1.2856	1.2726	1.2946	1.2866	1.2856	1.2866	1.2686	1.2746	1.2846	1.2906	1.2836	1.2716	1.2716	1.2676	1.2796	1.2666	1.2596	1.2616	1.2586	1.2706	1.2606	1.2446	1.2526	1.2516	1.2566	1.2476	1.2666	1.2536	1.2886	1.2756	1.2506	1.2856	1.2876	1.2706	1.2666	1.2626	1.2616	1.2586	1.2596	1.2576	1.2556	1.2556	1.2636	1.2596	1.2526
900.1	1.2912	1.2892	1.2962	1.2952	1.3062	1.2892	1.3132	1.3032	1.3022	1.3032	1.2852	1.2942	1.3022	1.3082	1.3032	1.2892	1.2882	1.2852	1.2962	1.2852	1.2862	1.2812	1.2792	1.2902	1.2792	1.2622	1.2692	1.2672	1.2772	1.2672	1.2842	1.1552	1.3072	1.2932	1.2682	1.2992	1.3032	1.2872	1.2842	1.2792	1.2802	1.2792	1.2772	1.2822	1.2742	1.2732	1.2812	1.2772	1.2702
920.1	1.3054	1.3064	1.3124	1.3144	1.3224	1.3014	1.3284	1.3174	1.3174	1.3174	1.3024	1.3104	1.3154	1.3224	1.3164	1.3014	1.3034	1.2994	1.3114	1.2994	1.3024	1.2984	1.2934	1.3074	1.2954	1.2774	1.2864	1.2854	1.2934	1.2844	1.3004	1.2344	1.3204	1.3104	1.2814	1.3134	1.3184	1.3024	1.2984	1.2944	1.2954	1.2954	1.2934	1.2984	1.2894	1.2884	1.2964	1.2924	1.2884
940.1	1.3162	1.3162	1.3252	1.3252	1.3312	1.3142	1.3402	1.3302	1.3282	1.3282	1.3132	1.3232	1.3282	1.3342	1.3262	1.3132	1.3162	1.3122	1.3252	1.3112	1.3152	1.3112	1.3072	1.3192	1.3082	1.2862	1.2982	1.2992	1.3072	1.2982	1.3122	1.2742	1.3332	1.3212	1.2932	1.3232	1.3282	1.3152	1.3112	1.3062	1.3092	1.3092	1.3082	1.3132	1.3052	1.3022	1.3102	1.3062	1.3022
960.1	1.329	1.328	1.345	1.338	1.345	1.325	1.352	1.341	1.339	1.34	1.325	1.335	1.34	1.345	1.337	1.324	1.326	1.324	1.337	1.324	1.329	1.325	1.321	1.334	1.322	1.302	1.312	1.312	1.321	1.31	1.324	1.286	1.345	1.336	1.304	1.332	1.34	1.325	1.322	1.316	1.32	1.324	1.321	1.325	1.315	1.314	1.334	1.32	1.317
980.1	1.337	1.336	1.356	1.348	1.357	1.333	1.362	1.351	1.348	1.349	1.334	1.346	1.35	1.354	1.346	1.332	1.335	1.334	1.352	1.334	1.34	1.335	1.329	1.343	1.33	1.313	1.322	1.324	1.331	1.321	1.333	1.249	1.354	1.345	1.313	1.339	1.349	1.333	1.331	1.327	1.331	1.335	1.331	1.338	1.324	1.324	1.345	1.33	1.327
1000.1	1.346	1.346	1.367	1.358	1.368	1.342	1.371	1.36	1.357	1.356	1.342	1.356	1.357	1.362	1.356	1.339	1.344	1.342	1.363	1.344	1.348	1.346	1.338	1.354	1.339	1.321	1.331	1.332	1.341	1.331	1.342	1.273	1.361	1.354	1.32	1.346	1.354	1.34	1.339	1.335	1.344	1.345	1.34	1.348	1.334	1.333	1.357	1.341	1.337
1020.1	1.353	1.356	1.374	1.365	1.374	1.348	1.378	1.367	1.366	1.363	1.349	1.362	1.363	1.368	1.361	1.345	1.352	1.349	1.37	1.35	1.355	1.353	1.346	1.361	1.347	1.328	1.338	1.341	1.35	1.338	1.349	1.303	1.367	1.359	1.325	1.35	1.36	1.346	1.346	1.343	1.351	1.353	1.349	1.355	1.341	1.34	1.366	1.349	1.345
1040.1	1.3568	1.3598	1.3788	1.3728	1.3818	1.3528	1.3818	1.3728	1.3688	1.3658	1.3528	1.3668	1.3668	1.3728	1.3668	1.3478	1.3548	1.3528	1.3728	1.3548	1.3628	1.3588	1.3518	1.3698	1.3528	1.3338	1.3428	1.3458	1.3538	1.3418	1.3528	1.2748	1.3728	1.3658	1.3298	1.3538	1.3638	1.3498	1.3498	1.3448	1.3568	1.3598	1.3538	1.3628	1.3468	1.3478	1.3708	1.3548	1.3508
1060.1	1.359	1.362	1.383	1.377	1.387	1.356	1.384	1.375	1.372	1.37	1.356	1.37	1.37	1.375	1.37	1.35	1.356	1.356	1.376	1.356	1.366	1.362	1.356	1.372	1.356	1.338	1.347	1.35	1.358	1.345	1.355	1.275	1.375	1.369	1.332	1.356	1.367	1.354	1.353	1.347	1.36	1.365	1.357	1.367	1.35	1.349	1.375	1.359	1.354
1080.1	1.3608	1.3638	1.3848	1.3798	1.3888	1.3588	1.3858	1.3768	1.3738	1.3688	1.3568	1.3708	1.3698	1.3768	1.3708	1.3518	1.3588	1.3578	1.3778	1.3588	1.3678	1.3638	1.3568	1.3748	1.3578	1.3398	1.3488	1.3518	1.3628	1.3478	1.3558	1.2878	1.3748	1.3678	1.3328	1.3558	1.3688	1.3538	1.3538	1.3488	1.3608	1.3678	1.3598	1.3688	1.3508	1.3518	1.3778	1.3618	1.3568
1100.1	1.3602	1.3622	1.3842	1.3822	1.3912	1.3582	1.3862	1.3752	1.3712	1.3682	1.3572	1.3722	1.3712	1.3772	1.3742	1.3522	1.3592	1.3582	1.3782	1.3582	1.3682	1.3642	1.3572	1.3752	1.3592	1.3402	1.3482	1.3532	1.3642	1.3482	1.3562	1.2982	1.3742	1.3682	1.3332	1.3542	1.3672	1.3522	1.3522	1.3472	1.3612	1.3662	1.3602	1.3682	1.3522	1.3512	1.3792	1.3622	1.3572
1120.1	1.3614	1.3624	1.3844	1.3824	1.3904	1.3584	1.3864	1.3754	1.3734	1.3684	1.3584	1.3734	1.3714	1.3774	1.3734	1.3534	1.3614	1.3584	1.3794	1.3604	1.3694	1.3644	1.3584	1.3754	1.3594	1.3394	1.3494	1.3534	1.3634	1.3494	1.3574	1.2904	1.3754	1.3694	1.3344	1.3554	1.3664	1.3524	1.3524	1.3484	1.3614	1.3694	1.3594	1.3684	1.3534	1.3504	1.3824	1.3634	1.3564
1140.1	1.3602	1.3612	1.3842	1.3812	1.3902	1.3572	1.3862	1.3752	1.3752	1.3692	1.3582	1.3722	1.3712	1.3772	1.3722	1.3522	1.3602	1.3592	1.3802	1.3592	1.3692	1.3652	1.3582	1.3772	1.3592	1.3402	1.3492	1.3522	1.3642	1.3492	1.3572	1.3142	1.3752	1.3682	1.3332	1.3552	1.3662	1.3522	1.3522	1.3472	1.3612	1.3672	1.3592	1.3672	1.3512	1.3512	1.3872	1.3622	1.3572
1160.1	1.3604	1.3624	1.3854	1.3844	1.3954	1.3584	1.3894	1.3774	1.3734	1.3694	1.3584	1.3744	1.3734	1.3784	1.3774	1.3534	1.3624	1.3594	1.3814	1.3614	1.3714	1.3664	1.3584	1.3804	1.3614	1.3424	1.3514	1.3544	1.3654	1.3504	1.3584	1.2884	1.3764	1.3714	1.3344	1.3554	1.3674	1.3564	1.3544	1.3484	1.3634	1.3694	1.3614	1.3714	1.3534	1.3514	1.3904	1.3634	1.3574
1180.1	1.361	1.363	1.385	1.384	1.395	1.358	1.389	1.377	1.374	1.369	1.359	1.376	1.372	1.378	1.376	1.353	1.362	1.359	1.381	1.361	1.372	1.367	1.359	1.38	1.361	1.342	1.352	1.354	1.365	1.35	1.358	1.287	1.376	1.372	1.335	1.355	1.367	1.355	1.354	1.349	1.364	1.369	1.36	1.37	1.353	1.352	1.391	1.365	1.358
1200.1	1.361	1.363	1.386	1.384	1.394	1.356	1.388	1.377	1.374	1.369	1.36	1.374	1.373	1.379	1.376	1.355	1.364	1.36	1.381	1.363	1.372	1.366	1.359	1.38	1.361	1.341	1.351	1.354	1.366	1.351	1.358	1.294	1.376	1.371	1.333	1.353	1.365	1.354	1.354	1.349	1.363	1.37	1.362	1.372	1.354	1.351	1.391	1.364	1.357
1220.1	1.358	1.36	1.384	1.383	1.393	1.355	1.387	1.376	1.372	1.367	1.358	1.374	1.372	1.378	1.374	1.353	1.361	1.359	1.381	1.361	1.373	1.366	1.358	1.38	1.36	1.341	1.351	1.353	1.364	1.349	1.357	1.293	1.375	1.37	1.333	1.353	1.365	1.356	1.353	1.347	1.362	1.369	1.359	1.369	1.351	1.35	1.391	1.363	1.357
1240.1	1.3578	1.3588	1.3838	1.3818	1.3918	1.3558	1.3858	1.3758	1.3718	1.3688	1.3598	1.3748	1.3728	1.3778	1.3768	1.3538	1.3628	1.3598	1.3808	1.3608	1.3718	1.3648	1.3578	1.3778	1.3598	1.3388	1.3498	1.3518	1.3638	1.3488	1.3578	1.2958	1.3758	1.3698	1.3328	1.3508	1.3618	1.3538	1.3528	1.3468	1.3618	1.3688	1.3598	1.3698	1.3518	1.3498	1.3918	1.3618	1.3558
1260.1	1.3588	1.3588	1.3848	1.3828	1.3938	1.3558	1.3868	1.3768	1.3728	1.3678	1.3598	1.3748	1.3738	1.3788	1.3768	1.3538	1.3638	1.3598	1.3818	1.3618	1.3728	1.3658	1.3578	1.3788	1.3598	1.3388	1.3508	1.3538	1.3638	1.3498	1.3598	1.2948	1.3768	1.3728	1.3338	1.3518	1.3638	1.3538	1.3538	1.3488	1.3608	1.3678	1.3598	1.3698	1.3528	1.3498	1.3938	1.3628	1.3568
1280.1	1.3586	1.3586	1.3846	1.3826	1.3936	1.3546	1.3866	1.3776	1.3736	1.3696	1.3606	1.3756	1.3746	1.3786	1.3786	1.3536	1.3626	1.3606	1.3826	1.3626	1.3746	1.3666	1.3576	1.3806	1.3596	1.3386	1.3496	1.3526	1.3626	1.3496	1.3586	1.2986	1.3776	1.3726	1.3346	1.3516	1.3646	1.3556	1.3546	1.3486	1.3616	1.3696	1.3616	1.3716	1.3526	1.3506	1.3956	1.3626	1.3576
1300.1	1.3596	1.3606	1.3866	1.3856	1.3966	1.3546	1.3876	1.3776	1.3736	1.3696	1.3616	1.3766	1.3746	1.3806	1.3806	1.3556	1.3626	1.3606	1.3826	1.3636	1.3746	1.3666	1.3576	1.3816	1.3606	1.3386	1.3506	1.3536	1.3646	1.3506	1.3596	1.2966	1.3786	1.3746	1.3346	1.3526	1.3666	1.3566	1.3566	1.3496	1.3626	1.3686	1.3616	1.3706	1.3526	1.3516	1.3956	1.3636	1.3576
1320.1	1.3602	1.3612	1.3872	1.3862	1.3962	1.3562	1.3872	1.3782	1.3742	1.3702	1.3622	1.3772	1.3752	1.3802	1.3782	1.3572	1.3652	1.3612	1.3842	1.3642	1.3752	1.3662	1.3582	1.3812	1.3602	1.3392	1.3502	1.3532	1.3652	1.3502	1.3622	1.2922	1.3802	1.3752	1.3362	1.3522	1.3652	1.3582	1.3562	1.3502	1.3632	1.3702	1.3612	1.3732	1.3532	1.3512	1.3982	1.3632	1.3582
1340.1	#DIV/0!	#DIV/0!	#DIV/0!	#DIV/0!	#DIV/0!	#DIV/0!	#DIV/0!	#DIV/0!	#DIV/0!	#DIV/0!	#DIV/0!	#DIV/0!	#DIV/0!	#DIV/0!	#DIV/0!	#DIV/0!	#DIV/0!	#DIV/0!	#DIV/0!	#DIV/0!	#DIV/0!	#DIV/0!	#DIV/0!	#DIV/0!	#DIV/0!	#DIV/0!	#DIV/0!	#DIV/0!	#DIV/0!	#DIV/0!	#DIV/0!	#DIV/0!	#DIV/0!	#DIV/0!	#DIV/0!	#DIV/0!	#DIV/0!	#DIV/0!	#DIV/0!	#DIV/0!	#DIV/0!	#DIV/0!	#DIV/0!	#DIV/0!	#DIV/0!	#DIV/0!	#DIV/0!	#DIV/0!	#DIV/0!
1360.1	#DIV/0!	#DIV/0!	#DIV/0!	#DIV/0!	#DIV/0!	#DIV/0!	#DIV/0!	#DIV/0!	#DIV/0!	#DIV/0!	#DIV/0!	#DIV/0!	#DIV/0!	#DIV/0!	#DIV/0!	#DIV/0!	#DIV/0!	#DIV/0!	#DIV/0!	#DIV/0!	#DIV/0!	#DIV/0!	#DIV/0!	#DIV/0!	#DIV/0!	#DIV/0!	#DIV/0!	#DIV/0!	#DIV/0!	#DIV/0!	#DIV/0!	#DIV/0!	#DIV/0!	#DIV/0!	#DIV/0!	#DIV/0!	#DIV/0!	#DIV/0!	#DIV/0!	#DIV/0!	#DIV/0!	#DIV/0!	#DIV/0!	#DIV/0!	#DIV/0!	#DIV/0!	#DIV/0!	#DIV/0!	#DIV/0!
1380.1	#DIV/0!	#DIV/0!	#DIV/0!	#DIV/0!	#DIV/0!	#DIV/0!	#DIV/0!	#DIV/0!	#DIV/0!	#DIV/0!	#DIV/0!	#DIV/0!	#DIV/0!	#DIV/0!	#DIV/0!	#DIV/0!	#DIV/0!	#DIV/0!	#DIV/0!	#DIV/0!	#DIV/0!	#DIV/0!	#DIV/0!	#DIV/0!	#DIV/0!	#DIV/0!	#DIV/0!	#DIV/0!	#DIV/0!	#DIV/0!	#DIV/0!	#DIV/0!	#DIV/0!	#DIV/0!	#DIV/0!	#DIV/0!	#DIV/0!	#DIV/0!	#DIV/0!	#DIV/0!	#DIV/0!	#DIV/0!	#DIV/0!	#DIV/0!	#DIV/0!	#DIV/0!	#DIV/0!	#DIV/0!	#DIV/0!
1400.1	#DIV/0!	#DIV/0!	#DIV/0!	#DIV/0!	#DIV/0!	#DIV/0!	#DIV/0!	#DIV/0!	#DIV/0!	#DIV/0!	#DIV/0!	#DIV/0!	#DIV/0!	#DIV/0!	#DIV/0!	#DIV/0!	#DIV/0!	#DIV/0!	#DIV/0!	#DIV/0!	#DIV/0!	#DIV/0!	#DIV/0!	#DIV/0!	#DIV/0!	#DIV/0!	#DIV/0!	#DIV/0!	#DIV/0!	#DIV/0!	#DIV/0!	#DIV/0!	#DIV/0!	#DIV/0!	#DIV/0!	#DIV/0!	#DIV/0!	#DIV/0!	#DIV/0!	#DIV/0!	#DIV/0!	#DIV/0!	#DIV/0!	#DIV/0!	#DIV/0!	#DIV/0!	#DIV/0!	#DIV/0!	#DIV/0!
1420.1	#DIV/0!	#DIV/0!	#DIV/0!	#DIV/0!	#DIV/0!	#DIV/0!	#DIV/0!	#DIV/0!	#DIV/0!	#DIV/0!	#DIV/0!	#DIV/0!	#DIV/0!	#DIV/0!	#DIV/0!	#DIV/0!	#DIV/0!	#DIV/0!	#DIV/0!	#DIV/0!	#DIV/0!	#DIV/0!	#DIV/0!	#DIV/0!	#DIV/0!	#DIV/0!	#DIV/0!	#DIV/0!	#DIV/0!	#DIV/0!	#DIV/0!	#DIV/0!	#DIV/0!	#DIV/0!	#DIV/0!	#DIV/0!	#DIV/0!	#DIV/0!	#DIV/0!	#DIV/0!	#DIV/0!	#DIV/0!	#DIV/0!	#DIV/0!	#DIV/0!	#DIV/0!	#DIV/0!	#DIV/0!	#DIV/0!
#VALUE!	#DIV/0!	#DIV/0!	#DIV/0!	#DIV/0!	#DIV/0!	#DIV/0!	#DIV/0!	#DIV/0!	#DIV/0!	#DIV/0!	#DIV/0!	#DIV/0!	#DIV/0!	#DIV/0!	#DIV/0!	#DIV/0!	#DIV/0!	#DIV/0!	#DIV/0!	#DIV/0!	#DIV/0!	#DIV/0!	#DIV/0!	#DIV/0!	#DIV/0!	#DIV/0!	#DIV/0!	#DIV/0!	#DIV/0!	#DIV/0!	#DIV/0!	#DIV/0!	#DIV/0!	#DIV/0!	#DIV/0!	#DIV/0!	#DIV/0!	#DIV/0!	#DIV/0!	#DIV/0!	#DIV/0!	#DIV/0!	#DIV/0!	#DIV/0!	#DIV/0!	#DIV/0!	#DIV/0!	#DIV/0!	#DIV/0!
LOG
Time (min)	BY4741 + pRS315	BY4741 + pRS315	BY4741 + pRS315	BY4741 + pRS315	BY4741 + pRS315	BY4741 + pRS315	BY4741 + pRS315	BY4741 + pRS315	BY4741 + pRS315	BY4741 + pRS315	SNR52::URA3 + pRS315	SNR52::URA3 + pRS315	SNR52::URA3 + pRS315	SNR52::URA3 + pRS315	SNR52::URA3 + pRS315	SNR52::URA3 + pRS315	SNR52::URA3 + pRS315	SNR52::URA3 + pRS315	SNR52::URA3 + pRS315	SNR52::URA3 + pRS315	SNR52::URA3 + dCas9	SNR52::URA3 + dCas9	SNR52::URA3 + dCas9	SNR52::URA3 + dCas9	SNR52::URA3 + dCas9	SNR52::URA3 + dCas9	SNR52::URA3 + dCas9	SNR52::URA3 + dCas9	SNR52::URA3 + dCas9	SNR52::URA3 + dCas9	SNR52::AS1A + dCas9	SNR52::AS1A + dCas9	SNR52::AS1A + dCas9	SNR52::AS1A + dCas9	SNR52::AS1A + dCas9	SNR52::AS1A + dCas9	SNR52::AS1A + dCas9	SNR52::AS1A + dCas9	SNR52::AS1A + dCas9	SNR52::AS1A + dCas9	SNR52::AS1M + dCas9	SNR52::AS1M + dCas9	SNR52::AS1M + dCas9	SNR52::AS1M + dCas9	SNR52::AS1M + dCas9	SNR52::AS1M + dCas9	SNR52::AS1M + dCas9	SNR52::AS1M + dCas9	SNR52::AS1M + dCas9
0.133333	-1.2993	-1.30803	-1.2993	-1.29073	-1.28233	-1.29073	-1.2993	-1.2993	-1.28233	-1.27409	-1.31695	-1.2993	-1.30803	-1.29073	-1.266	-1.25026	-1.29073	-1.2993	-1.2993	-1.30803	-1.22768	-1.2204	-1.21325	-1.2204	-1.22768	-1.2426	-1.22768	-1.2204	-1.22768	-1.21325	-1.19928	-1.19246	-1.17263	-1.18575	-1.14752	-1.14752	-1.18575	-1.17263	-1.19246	-1.18575	-1.16622	-1.18575	-1.18575	-1.18575	-1.18575	-1.17914	-1.17914	-1.18575	-1.17914
20.1	-1.23807	-1.24565	-1.25337	-1.24565	-1.23062	-1.23062	-1.23062	-1.23062	-1.23062	-1.2233	-1.26922	-1.25337	-1.25337	-1.23807	-1.2161	-1.19518	-1.2161	-1.24565	-1.25337	-1.26122	-1.20204	-1.19518	-1.18842	-1.18842	-1.18842	-1.17522	-1.18842	-1.19518	-1.20901	-1.17522	-1.16877	-1.17522	-1.14997	-1.14997	-1.1261	-1.06651	-1.1261	-1.13787	-1.16877	-1.18177	-1.14388	-1.15614	-1.16241	-1.15614	-1.15614	-1.13194	-1.13787	-1.15614	-1.16877
40.1	-1.20343	-1.20343	-1.20343	-1.19654	-1.17653	-1.17653	-1.18977	-1.19654	-1.18977	-1.1831	-1.21753	-1.21753	-1.18977	-1.17653	-1.16368	-1.14509	-1.1831	-1.21042	-1.21753	-1.2321	-1.16368	-1.16368	-1.1512	-1.13906	-1.14509	-1.14509	-1.1512	-1.16368	-1.17653	-1.17005	-1.12148	-1.12726	-1.11014	-1.11014	-1.09366	-1.00612	-1.07263	-1.11014	-1.12726	-1.13906	-1.09909	-1.10458	-1.11014	-1.10458	-1.10458	-1.07779	-1.09366	-1.09909	-1.12148
60.1	-1.18575	-1.17914	-1.16622	-1.16622	-1.14146	-1.14752	-1.16622	-1.17914	-1.16622	-1.15989	-1.19928	-1.18575	-1.16622	-1.14752	-1.13549	-1.11805	-1.15366	-1.19246	-1.19928	-1.20621	-1.14146	-1.14146	-1.1296	-1.11805	-1.12378	-1.11805	-1.11805	-1.14146	-1.15366	-1.14146	-1.09044	-1.08513	-1.06449	-1.06956	-1.04479	-0.982132	-1.04479	-1.07988	-1.10127	-1.11238	-1.06956	-1.06956	-1.07988	-1.06449	-1.05948	-1.05453	-1.06449	-1.06956	-1.08513
80.1	-1.16115	-1.1549	-1.14874	-1.13077	-1.11351	-1.13077	-1.14874	-1.16115	-1.14267	-1.13077	-1.17393	-1.16115	-1.13668	-1.11919	-1.10791	-1.09151	-1.14267	-1.17393	-1.18046	-1.18709	-1.12494	-1.11919	-1.10237	-1.09151	-1.10237	-1.09691	-1.10237	-1.12494	-1.13077	-1.12494	-1.07572	-1.06048	-1.03152	-1.03621	-1.02228	-0.954677	-1.02228	-1.05061	-1.07572	-1.08092	-1.04096	-1.04576	-1.04576	-1.03621	-1.03152	-1.02228	-1.04096	-1.05552	-1.06048
100.1	-1.14509	-1.13906	-1.12726	-1.11577	-1.09909	-1.10458	-1.12148	-1.13312	-1.12148	-1.11014	-1.15739	-1.14509	-1.11577	-1.09909	-1.08302	-1.06753	-1.11577	-1.14509	-1.15739	-1.17005	-1.09909	-1.09909	-1.08302	-1.07263	-1.07779	-1.07779	-1.08302	-1.09909	-1.11014	-1.09366	-1.04769	-1.04287	-1.00612	-1.01502	-0.997402	-0.918653	-0.98464	-1.01055	-1.04287	-1.04769	-1.01055	-1.01954	-1.01954	-1.00612	-0.997402	-1.00174	-1.01502	-1.02411	-1.02411
120.1	-1.10791	-1.10237	-1.09151	-1.09151	-1.07572	-1.07572	-1.09691	-1.10791	-1.09151	-1.08092	-1.11919	-1.11351	-1.08619	-1.07572	-1.06048	-1.03621	-1.08619	-1.11351	-1.12494	-1.13668	-1.08092	-1.07058	-1.06048	-1.05061	-1.05552	-1.05552	-1.06048	-1.08092	-1.09151	-1.07572	-1.01773	-1.01773	-0.982967	-0.987163	-0.970616	-0.89279	-0.958607	-0.987163	-1.01323	-1.01323	-0.987163	-1	-0.995679	-0.987163	-0.974694	-0.970616	-0.978811	-0.995679	-0.995679
140.1	-1.07779	-1.07263	-1.06248	-1.05257	-1.0381	-1.04287	-1.0575	-1.06753	-1.0575	-1.04287	-1.07779	-1.07263	-1.04769	-1.03339	-1.01502	-0.993106	-1.04769	-1.07779	-1.08302	-1.09366	-1.0381	-1.02872	-1.02411	-1.01502	-1.01954	-1.01502	-1.02411	-1.04769	-1.0575	-1.04287	-0.980468	-0.976336	-0.940815	-0.944622	-0.929593	-0.839832	-0.918653	-0.952336	-0.972243	-0.980468	-0.952336	-0.960189	-0.960189	-0.944622	-0.937042	-0.925915	-0.948462	-0.960189	-0.96417
160.1	-1.03433	-1.02503	-1.01592	-1.01592	-0.998266	-0.998266	-1.02045	-1.02965	-1.01592	-1.00261	-1.03905	-1.03433	-1.007	-0.9897	-0.973058	-0.945387	-0.998266	-1.02965	-1.03905	-1.05355	-0.985479	-0.9813	-0.9813	-0.964971	-0.968996	-0.9813	-0.985479	-0.998266	-1.00261	-0.998266	-0.941574	-0.934047	-0.901702	-0.908685	-0.894831	-0.805763	-0.874844	-0.912219	-0.934047	-0.937794	-0.912219	-0.926648	-0.922996	-0.908685	-0.901702	-0.884722	-0.908685	-0.922996	-0.926648
180.1	-0.9897	-0.9897	-0.973058	-0.973058	-0.953115	-0.953115	-0.973058	-0.985479	-0.973058	-0.957031	-0.993962	-0.985479	-0.957031	-0.941574	-0.926648	-0.908685	-0.957031	-0.9897	-0.993962	-1.007	-0.949234	-0.945387	-0.941574	-0.930332	-0.930332	-0.941574	-0.945387	-0.960983	-0.964971	-0.960983	-0.898253	-0.894831	-0.865186	-0.868381	-0.862013	-0.773658	-0.831503	-0.865186	-0.888066	-0.894831	-0.868381	-0.881405	-0.881405	-0.868381	-0.865186	-0.84649	-0.862013	-0.871601	-0.884722
200.1	-0.934794	-0.938548	-0.931072	-0.923724	-0.905878	-0.895513	-0.931072	-0.934794	-0.912929	-0.902396	-0.946154	-0.938548	-0.912929	-0.898941	-0.882066	-0.859492	-0.905878	-0.938548	-0.942334	-0.957818	-0.909389	-0.905878	-0.902396	-0.892112	-0.892112	-0.898941	-0.905878	-0.916497	-0.923724	-0.920096	-0.850165	-0.850165	-0.817585	-0.82333	-0.817585	-0.739452	-0.795337	-0.829152	-0.850165	-0.856361	-0.835053	-0.8471	-0.841035	-0.826231	-0.82333	-0.809108	-0.82333	-0.835053	-0.8471
220.1	-0.896881	-0.883392	-0.873544	-0.873544	-0.854493	-0.854493	-0.87031	-0.886725	-0.876802	-0.8671	-0.900319	-0.890084	-0.857611	-0.842241	-0.830326	-0.821599	-0.863914	-0.890084	-0.900319	-0.910802	-0.8671	-0.863914	-0.863914	-0.851397	-0.851397	-0.860751	-0.863914	-0.873544	-0.880085	-0.876802	-0.807433	-0.801893	-0.775208	-0.780415	-0.777804	-0.705975	-0.752518	-0.785686	-0.807433	-0.810229	-0.788346	-0.796423	-0.796423	-0.788346	-0.777804	-0.75995	-0.780415	-0.793714	-0.801893
240.1	-0.845272	-0.836242	-0.827397	-0.818728	-0.801893	-0.804654	-0.824488	-0.824488	-0.810229	-0.804654	-0.848324	-0.845272	-0.818728	-0.804654	-0.793714	-0.777804	-0.815877	-0.845272	-0.845272	-0.854493	-0.818728	-0.815877	-0.813044	-0.79915	-0.79915	-0.813044	-0.818728	-0.830326	-0.836242	-0.833274	-0.767512	-0.764977	-0.730954	-0.740406	-0.733298	-0.659953	-0.710411	-0.740406	-0.762456	-0.767512	-0.750068	-0.75995	-0.754981	-0.742802	-0.738024	-0.714893	-0.733298	-0.747632	-0.757459
260.1	-0.787812	-0.774691	-0.772113	-0.769551	-0.752027	-0.756962	-0.767004	-0.782516	-0.767004	-0.754487	-0.798603	-0.790485	-0.767004	-0.752027	-0.739929	-0.732828	-0.764472	-0.793174	-0.798603	-0.806875	-0.767004	-0.764472	-0.764472	-0.752027	-0.752027	-0.769551	-0.772113	-0.779892	-0.785156	-0.785156	-0.723538	-0.721246	-0.69037	-0.692504	-0.686133	-0.617983	-0.667562	-0.705534	-0.725842	-0.725842	-0.712198	-0.721246	-0.714443	-0.701147	-0.69037	-0.673664	-0.69037	-0.712198	-0.718967
280.1	-0.730954	-0.730954	-0.726304	-0.726304	-0.708187	-0.705975	-0.723998	-0.728623	-0.717151	-0.712646	-0.747632	-0.742802	-0.723998	-0.710411	-0.699405	-0.690796	-0.719422	-0.747632	-0.74521	-0.757459	-0.728623	-0.726304	-0.726304	-0.712646	-0.712646	-0.726304	-0.730954	-0.740406	-0.74521	-0.740406	-0.684449	-0.684449	-0.652085	-0.656001	-0.644357	-0.58203	-0.627456	-0.657972	-0.674074	-0.68027	-0.676129	-0.684449	-0.68027	-0.661942	-0.652085	-0.636764	-0.652085	-0.669992	-0.68027
300.1	-0.686555	-0.682354	-0.678195	-0.676129	-0.657972	-0.65014	-0.669992	-0.68027	-0.665949	-0.661942	-0.705975	-0.697236	-0.674074	-0.659953	-0.648204	-0.646276	-0.676129	-0.701584	-0.705975	-0.714893	-0.68867	-0.686555	-0.686555	-0.672028	-0.676129	-0.684449	-0.68867	-0.699405	-0.703774	-0.703774	-0.644357	-0.642446	-0.614751	-0.616544	-0.602408	-0.542421	-0.585361	-0.612966	-0.631155	-0.636764	-0.627456	-0.636764	-0.63865	-0.627456	-0.616544	-0.597223	-0.611189	-0.616544	-0.627456
320.1	-0.629672	-0.627825	-0.624154	-0.62233	-0.606249	-0.601019	-0.620513	-0.627825	-0.613323	-0.606249	-0.650528	-0.64474	-0.62233	-0.609772	-0.601019	-0.599289	-0.624154	-0.64474	-0.64859	-0.656394	-0.637141	-0.63339	-0.637141	-0.624154	-0.624154	-0.635261	-0.639028	-0.646661	-0.650528	-0.650528	-0.595851	-0.592439	-0.561299	-0.567672	-0.556581	-0.505011	-0.542724	-0.56928	-0.585695	-0.587371	-0.575772	-0.587371	-0.584026	-0.579055	-0.572514	-0.553463	-0.562884	-0.57414	-0.580705
340.1	-0.578725	-0.575445	-0.573814	-0.573814	-0.559406	-0.557834	-0.568958	-0.577082	-0.562567	-0.556268	-0.598944	-0.595508	-0.573814	-0.564156	-0.557834	-0.553152	-0.580375	-0.595508	-0.597223	-0.605899	-0.592099	-0.590405	-0.588717	-0.578725	-0.580375	-0.588717	-0.593801	-0.600672	-0.605899	-0.60415	-0.539403	-0.537902	-0.511731	-0.521722	-0.517412	-0.466228	-0.497846	-0.523168	-0.537902	-0.536406	-0.526075	-0.533429	-0.536406	-0.530473	-0.527536	-0.515985	-0.521722	-0.529002	-0.537902
360.1	-0.530767	-0.52491	-0.523458	-0.526367	-0.512014	-0.512014	-0.522011	-0.530767	-0.514847	-0.507799	-0.553463	-0.548828	-0.527829	-0.517698	-0.513428	-0.509199	-0.533726	-0.550367	-0.550367	-0.558148	-0.544242	-0.542724	-0.541211	-0.530767	-0.532244	-0.542724	-0.547294	-0.555019	-0.559721	-0.558148	-0.491336	-0.491336	-0.466482	-0.476774	-0.480697	-0.434624	-0.456429	-0.478078	-0.492684	-0.491336	-0.483332	-0.489991	-0.492684	-0.489991	-0.489991	-0.479385	-0.482013	-0.487316	-0.494036
380.1	-0.479124	-0.475215	-0.475215	-0.477817	-0.466228	-0.466228	-0.473919	-0.479124	-0.464959	-0.45867	-0.504733	-0.501965	-0.480434	-0.47134	-0.4675	-0.466228	-0.487049	-0.500588	-0.501965	-0.508919	-0.500588	-0.497846	-0.495122	-0.485718	-0.488384	-0.495122	-0.501965	-0.508919	-0.513145	-0.511731	-0.445148	-0.445148	-0.423889	-0.436756	-0.445148	-0.394911	-0.414765	-0.436756	-0.447575	-0.445148	-0.441531	-0.448794	-0.451242	-0.448794	-0.447575	-0.436756	-0.440333	-0.445148	-0.452471
400.1	-0.430626	-0.430626	-0.430626	-0.435334	-0.425969	-0.423659	-0.427128	-0.429457	-0.416801	-0.411168	-0.454693	-0.450997	-0.435334	-0.427128	-0.423659	-0.422508	-0.440093	-0.453457	-0.453457	-0.459671	-0.452225	-0.452225	-0.44855	-0.440093	-0.443697	-0.449772	-0.454693	-0.462181	-0.465974	-0.464706	-0.403403	-0.402305	-0.38405	-0.395774	-0.404504	-0.355561	-0.374688	-0.395774	-0.404504	-0.404504	-0.401209	-0.406714	-0.411168	-0.407823	-0.407823	-0.399027	-0.400117	-0.404504	-0.412289
420.1	-0.387004	-0.384892	-0.384892	-0.39126	-0.380698	-0.379656	-0.381743	-0.384892	-0.372429	-0.36734	-0.409827	-0.406492	-0.390192	-0.38384	-0.379656	-0.380698	-0.397723	-0.409827	-0.408713	-0.415443	-0.409827	-0.408713	-0.406492	-0.397723	-0.400991	-0.406492	-0.409827	-0.417709	-0.421132	-0.419988	-0.35932	-0.35932	-0.340845	-0.352421	-0.361311	-0.317674	-0.33517	-0.3534	-0.363312	-0.36231	-0.35932	-0.365321	-0.368353	-0.365321	-0.365321	-0.357338	-0.35932	-0.363312	-0.370387
440.1	-0.342753	-0.340845	-0.34371	-0.351445	-0.338945	-0.339894	-0.341798	-0.341798	-0.329569	-0.326795	-0.364315	-0.36231	-0.348528	-0.342753	-0.338945	-0.340845	-0.357338	-0.365321	-0.364315	-0.370387	-0.365321	-0.363312	-0.36231	-0.354381	-0.358328	-0.365321	-0.36633	-0.371407	-0.375512	-0.375512	-0.3213	-0.32039	-0.301725	-0.313185	-0.323124	-0.280503	-0.298259	-0.316773	-0.324955	-0.323124	-0.3213	-0.326795	-0.330497	-0.327717	-0.327717	-0.3213	-0.324038	-0.326795	-0.333295
460.1	-0.30312	-0.301378	-0.30312	-0.310159	-0.298778	-0.300509	-0.301378	-0.30312	-0.290221	-0.287687	-0.325506	-0.323672	-0.309272	-0.303993	-0.300509	-0.302248	-0.315514	-0.325506	-0.323672	-0.330125	-0.327348	-0.325506	-0.323672	-0.316413	-0.320936	-0.325506	-0.326426	-0.332921	-0.334794	-0.334794	-0.282662	-0.282662	-0.267124	-0.278519	-0.287687	-0.248259	-0.26233	-0.278519	-0.287687	-0.285167	-0.285167	-0.290221	-0.292771	-0.291919	-0.292771	-0.287687	-0.287687	-0.291069	-0.296193
480.1	-0.2652	-0.263603	-0.2652	-0.272459	-0.261219	-0.261219	-0.262013	-0.262807	-0.251037	-0.249492	-0.284833	-0.283162	-0.270026	-0.264401	-0.262013	-0.264401	-0.277366	-0.284833	-0.281498	-0.289883	-0.284833	-0.283162	-0.282329	-0.275724	-0.281498	-0.286509	-0.286509	-0.291579	-0.294136	-0.293282	-0.248721	-0.247952	-0.230623	-0.243364	-0.252588	-0.213249	-0.226945	-0.243364	-0.251037	-0.249492	-0.250264	-0.254925	-0.258061	-0.25649	-0.257275	-0.250264	-0.251812	-0.255707	-0.259637
500.1	-0.226506	-0.225045	-0.227972	-0.23463	-0.224317	-0.224317	-0.224317	-0.225045	-0.214243	-0.212115	-0.24443	-0.243668	-0.232399	-0.227238	-0.223589	-0.226506	-0.239879	-0.245193	-0.243668	-0.250573	-0.245193	-0.24443	-0.243668	-0.237622	-0.242908	-0.247491	-0.246723	-0.252899	-0.254457	-0.254457	-0.213533	-0.212823	-0.198185	-0.209293	-0.217098	-0.180061	-0.193413	-0.209293	-0.217098	-0.215668	-0.214955	-0.219971	-0.223589	-0.221415	-0.221415	-0.216382	-0.217814	-0.219971	-0.225045
520.1	-0.192736	-0.192059	-0.194092	-0.200935	-0.19071	-0.190036	-0.192059	-0.192736	-0.182038	-0.180061	-0.211407	-0.209996	-0.198871	-0.193413	-0.190036	-0.193413	-0.206489	-0.211407	-0.209996	-0.216382	-0.210701	-0.209293	-0.20859	-0.204398	-0.20859	-0.212823	-0.212115	-0.217098	-0.218532	-0.219251	-0.181378	-0.180719	-0.16647	-0.176787	-0.184688	-0.151441	-0.163296	-0.178094	-0.185353	-0.184024	-0.184024	-0.188693	-0.191384	-0.190036	-0.190036	-0.185353	-0.186686	-0.188693	-0.193413
540.1	-0.161151	-0.159267	-0.162412	-0.16813	-0.158015	-0.159267	-0.159267	-0.159267	-0.149354	-0.14691	-0.177832	-0.176526	-0.164944	-0.161151	-0.159894	-0.162412	-0.171985	-0.177832	-0.175874	-0.182435	-0.177832	-0.176526	-0.177178	-0.17134	-0.176526	-0.181774	-0.179799	-0.185087	-0.184422	-0.185752	-0.153663	-0.151811	-0.139662	-0.148742	-0.156145	-0.122629	-0.134304	-0.149967	-0.156145	-0.152427	-0.155523	-0.161151	-0.161151	-0.162412	-0.161151	-0.155523	-0.157391	-0.159267	-0.163676
560.1	-0.130886	-0.129713	-0.131473	-0.137392	-0.128544	-0.129713	-0.130886	-0.130886	-0.121593	-0.119301	-0.145208	-0.145815	-0.134422	-0.129713	-0.129713	-0.131473	-0.142788	-0.146423	-0.144602	-0.151318	-0.147642	-0.145208	-0.145815	-0.140381	-0.144602	-0.150089	-0.148864	-0.153168	-0.153787	-0.155026	-0.125634	-0.122744	-0.11025	-0.120445	-0.12796	-0.0986507	-0.108017	-0.121019	-0.127378	-0.126796	-0.127378	-0.131473	-0.13324	-0.13265	-0.13324	-0.129128	-0.130299	-0.131473	-0.136201
580.1	-0.103584	-0.103033	-0.104136	-0.108574	-0.100836	-0.102483	-0.104136	-0.103584	-0.0953926	-0.0932341	-0.11702	-0.116452	-0.106349	-0.102483	-0.100836	-0.104688	-0.114187	-0.118729	-0.115885	-0.122168	-0.118729	-0.11702	-0.11702	-0.111933	-0.116452	-0.121593	-0.120445	-0.124476	-0.125055	-0.126215	-0.100289	-0.0975619	-0.0862921	-0.0953926	-0.102483	-0.0753073	-0.0841782	-0.0970186	-0.103033	-0.101385	-0.103033	-0.106904	-0.10746	-0.106904	-0.10746	-0.104136	-0.105241	-0.106349	-0.11081
600.1	-0.0778976	-0.0768596	-0.0773783	-0.0825995	-0.0758241	-0.0773783	-0.0778976	-0.0778976	-0.0701725	-0.0686438	-0.0900163	-0.088949	-0.0799811	-0.0758241	-0.0758241	-0.0778976	-0.0873529	-0.0910863	-0.0894823	-0.094312	-0.0910863	-0.090551	-0.0900163	-0.0857627	-0.088949	-0.0953926	-0.094852	-0.098106	-0.098106	-0.0997421	-0.0753073	-0.0732461	-0.0630843	-0.0727323	-0.0799811	-0.053646	-0.0610802	-0.0732461	-0.0789381	-0.0778976	-0.0789381	-0.0820746	-0.0831251	-0.0831251	-0.0831251	-0.0799811	-0.0805035	-0.0820746	-0.0857627
620.1	-0.0557148	-0.0552213	-0.0567034	-0.0601813	-0.0532531	-0.0557148	-0.0562088	-0.0562088	-0.0483711	-0.0469172	-0.0667152	-0.0657036	-0.0567034	-0.0532531	-0.0532531	-0.0562088	-0.0641905	-0.0677292	-0.0657036	-0.0707855	-0.0687456	-0.0672219	-0.0672219	-0.0636874	-0.0662091	-0.0723217	-0.071297	-0.0748943	-0.0743785	-0.0764451	-0.0557148	-0.0527624	-0.0430636	-0.0517827	-0.0596828	-0.0345161	-0.0411495	-0.0527624	-0.0571985	-0.0567034	-0.0576942	-0.0606805	-0.0616805	-0.0611802	-0.0616805	-0.0591848	-0.0596828	-0.0611802	-0.0646943
640.1	-0.0353633	-0.0348924	-0.0348924	-0.0396244	-0.0325456	-0.0358347	-0.0358347	-0.0353633	-0.0292813	-0.0278898	-0.0444084	-0.0439277	-0.0358347	-0.0320778	-0.033014	-0.0348924	-0.0424885	-0.0444084	-0.0439277	-0.048274	-0.0468204	-0.045854	-0.0453716	-0.0420098	-0.0448898	-0.0502198	-0.0492458	-0.0526643	-0.0526643	-0.053646	-0.0353633	-0.0320778	-0.0242007	-0.0316105	-0.0396244	-0.0155627	-0.0219108	-0.0334828	-0.0381994	-0.0377254	-0.0381994	-0.0410541	-0.0420098	-0.0410541	-0.0415317	-0.0401004	-0.040577	-0.0420098	-0.0448898
660.1	-0.0164639	-0.0164639	-0.017367	-0.0205427	-0.0142144	-0.0169152	-0.0164639	-0.0160131	-0.0106392	-0.00930604	-0.0237418	-0.0232833	-0.0155627	-0.0124231	-0.0133178	-0.0155627	-0.0228253	-0.02512	-0.0232833	-0.0274269	-0.0269646	-0.0255804	-0.02512	-0.0219108	-0.0242007	-0.0302115	-0.028817	-0.0320778	-0.0325456	-0.0334828	-0.017367	-0.0137659	-0.00709318	-0.0146634	-0.0223678	0.000781027	-0.004014	-0.0146634	-0.0191788	-0.0191788	-0.0191788	-0.0228253	-0.0232833	-0.0237418	-0.0232833	-0.0228253	-0.0223678	-0.0232833	-0.0260413
680.1	0.000347297	0.000347297	-8.68676e-05	-0.00270101	0.00294321	-8.68676e-05	0.000347297	0.000781027	0.00595229	0.00638046	-0.00489154	-0.00489154	0.00207963	0.00552369	0.00423537	0.00207963	-0.00489154	-0.00621119	-0.00533098	-0.00886256	-0.00886256	-0.00797697	-0.00841954	-0.00533098	-0.00753485	-0.0119764	-0.0106392	-0.0142144	-0.0142144	-0.0151128	-8.68676e-05	0.00337435	0.00979072	0.00251163	-0.00577086	0.0173673	0.0119086	0.00251163	-0.00270101	-0.00226422	-0.00313823	-0.00577086	-0.00665196	-0.00577086	-0.00665196	-0.00533098	-0.00533098	-0.00577086	-0.00974997
700.1	0.0165319	0.015695	0.0152759	0.0127529	0.0186173	0.015695	0.0161137	0.0165319	0.0211066	0.0219332	0.0110627	0.0127529	0.0186173	0.0215201	0.0202784	0.0169498	0.0119086	0.0106391	0.012331	0.00894066	0.00808894	0.00851501	0.00894066	0.0119086	0.0093659	0.00423537	0.00552369	0.00251163	0.00294321	0.00164719	0.0144365	0.0169498	0.0256335	0.018201	0.0106391	0.0297084	0.0256335	0.0173673	0.0135955	0.012331	0.012331	0.0102151	0.00979072	0.00894066	0.00851501	0.0110627	0.0093659	0.00979072	0.00638046
720.1	0.0300327	0.0292214	0.0292214	0.0271865	0.0324576	0.0292214	0.0312468	0.0312468	0.0352696	0.0356698	0.0259609	0.0275942	0.0332629	0.0360697	0.034468	0.0316508	0.0271865	0.0255516	0.0267783	0.0239106	0.0222634	0.0226758	0.0234994	0.0263698	0.0239106	0.0197807	0.0206099	0.0185341	0.0185341	0.0168663	0.0288152	0.0304378	0.0380635	0.0316508	0.0243214	0.0420239	0.0388585	0.0308425	0.0271865	0.0267783	0.0259609	0.0234994	0.0230878	0.0222634	0.0230878	0.0243214	0.0234994	0.0239106	0.0210238
740.1	0.0428117	0.0428117	0.0428117	0.0408396	0.0451664	0.042418	0.0451664	0.0455577	0.0482864	0.0482864	0.0400482	0.0416295	0.047119	0.049838	0.0475085	0.0439907	0.0408396	0.0392554	0.0416295	0.0376655	0.0360697	0.0364692	0.0364692	0.039652	0.0372671	0.0324576	0.033665	0.0312468	0.0320544	0.0304378	0.0416295	0.043205	0.0506117	0.0443829	0.0368683	0.053309	0.0509981	0.043205	0.0400482	0.039652	0.0388585	0.0368683	0.0356698	0.0356698	0.0352696	0.0368683	0.0368683	0.0364692	0.0340667
760.1	0.0544598	0.0540766	0.0548428	0.05254	0.0559896	0.0536929	0.0578942	0.0578942	0.0597905	0.0601688	0.0521551	0.0536929	0.0582741	0.0613017	0.0582741	0.0556077	0.05254	0.0509981	0.053309	0.049838	0.0475085	0.0486748	0.0482864	0.0513841	0.0490629	0.0439907	0.0459485	0.043598	0.0439907	0.0428117	0.0529247	0.0536929	0.0616786	0.0556077	0.0482864	0.0643082	0.0620552	0.0548428	0.0517697	0.049838	0.0494506	0.0478976	0.0475085	0.047119	0.047119	0.0482864	0.0478976	0.0478976	0.0447749
780.1	0.0658037	0.0646826	0.0650566	0.0631832	0.066922	0.0646826	0.0702596	0.0684085	0.0702596	0.0706288	0.0631832	0.0646826	0.0691499	0.0721028	0.0691499	0.0665495	0.0635585	0.0620552	0.0639335	0.0613017	0.0582741	0.059033	0.059033	0.0616786	0.0594119	0.0540766	0.0559896	0.0540766	0.0544598	0.0536929	0.0631832	0.0631832	0.0721028	0.0654303	0.0582741	0.0735717	0.0721028	0.0654303	0.0624316	0.0613017	0.0601688	0.0586537	0.0582741	0.0582741	0.0582741	0.059033	0.0594119	0.0586537	0.0563712
800.1	0.0757659	0.0746702	0.075401	0.0750357	0.0775859	0.075401	0.0808429	0.0793983	0.0801212	0.0808429	0.0735717	0.0750357	0.0793983	0.0819231	0.0808429	0.0764948	0.0746702	0.0728379	0.075401	0.0721028	0.0691499	0.06989	0.0695201	0.0728379	0.06989	0.0643082	0.0665495	0.0646826	0.0661768	0.0643082	0.073205	0.0628075	0.0819231	0.0761305	0.0684085	0.0822826	0.0819231	0.075401	0.0724705	0.0706288	0.0702596	0.0680374	0.0684085	0.0684085	0.0680374	0.0687794	0.0695201	0.0687794	0.0661768
820.1	0.0851478	0.0840756	0.0847907	0.0847907	0.086929	0.0844333	0.0904697	0.0883488	0.0894105	0.0894105	0.0826418	0.0840756	0.088703	0.0911744	0.0890569	0.0851478	0.0833593	0.0819231	0.0855046	0.0812032	0.0786743	0.0790365	0.0786743	0.0826418	0.0793983	0.0735717	0.0761305	0.0746702	0.0761305	0.0739382	0.0819231	0.0709978	0.0908222	0.0858612	0.0772225	0.0908222	0.0904697	0.0840756	0.0815633	0.0801212	0.0793983	0.0783118	0.0775859	0.0783118	0.0775859	0.077949	0.0790365	0.0783118	0.075401
840.1	0.0928609	0.092159	0.0925101	0.0925101	0.0956574	0.0918076	0.098436	0.0963538	0.0967015	0.0973962	0.0911039	0.0925101	0.0963538	0.098436	0.0967015	0.092159	0.0911039	0.0900463	0.0935618	0.0893398	0.0868579	0.0872133	0.0868579	0.0903991	0.0872133	0.0814913	0.084004	0.0822107	0.0847192	0.08257	0.0900463	0.0829289	0.0977431	0.0932115	0.0847192	0.0977431	0.0980897	0.0925101	0.0893398	0.0872133	0.0879233	0.0865022	0.0861462	0.0868579	0.0857899	0.0854333	0.0868579	0.0857899	0.0836459
860.1	0.0998877	0.0991971	0.0995425	0.0995425	0.102982	0.0988513	0.106395	0.103667	0.103667	0.104009	0.0978124	0.0991971	0.103325	0.105374	0.102982	0.0988513	0.0985053	0.0971184	0.100577	0.096771	0.0939817	0.0946807	0.0943313	0.0985053	0.0946807	0.0894105	0.0918779	0.0904697	0.0925803	0.0897639	0.096771	0.0761305	0.105033	0.0998877	0.0915263	0.104009	0.104692	0.0991971	0.0964233	0.0946807	0.0950298	0.0943313	0.0932816	0.0943313	0.0929311	0.0922292	0.0943313	0.0943313	0.0915263
880.1	0.105374	0.105033	0.105715	0.105715	0.109106	0.104692	0.112136	0.109444	0.109106	0.109444	0.103325	0.105374	0.108768	0.110792	0.10843	0.104351	0.104351	0.102982	0.107074	0.102639	0.100233	0.100922	0.0998877	0.104009	0.100577	0.0950298	0.0978124	0.0974656	0.0991971	0.0960754	0.102639	0.098159	0.110118	0.105715	0.0971184	0.109106	0.109781	0.104009	0.102639	0.101266	0.100922	0.0998877	0.100233	0.0995425	0.0988513	0.0988513	0.10161	0.100233	0.0978124
900.1	0.110994	0.11032	0.112672	0.112337	0.11601	0.11032	0.118331	0.115011	0.114678	0.115011	0.108971	0.112001	0.114678	0.116674	0.115011	0.11032	0.109983	0.108971	0.112672	0.108971	0.109309	0.107617	0.106938	0.110657	0.106938	0.101128	0.10353	0.102845	0.106259	0.102845	0.108633	0.0626572	0.116342	0.111666	0.103188	0.113676	0.115011	0.109646	0.108633	0.106938	0.107278	0.106938	0.106259	0.107956	0.105238	0.104897	0.107617	0.106259	0.103872
920.1	0.115744	0.116076	0.118066	0.118728	0.121363	0.114411	0.123329	0.119718	0.119718	0.119718	0.114744	0.117404	0.119058	0.121363	0.119388	0.114411	0.115078	0.113743	0.117735	0.113743	0.114744	0.113409	0.111733	0.116408	0.112404	0.106327	0.109376	0.109038	0.111733	0.1087	0.114077	0.0914559	0.120706	0.117404	0.107685	0.118397	0.120047	0.114744	0.113409	0.112069	0.112404	0.112404	0.111733	0.113409	0.110388	0.110051	0.112739	0.111397	0.110051
940.1	0.119322	0.119322	0.122281	0.122281	0.124243	0.118661	0.12717	0.123917	0.123263	0.123263	0.118331	0.121625	0.123263	0.125221	0.122609	0.118331	0.119322	0.118	0.122281	0.117669	0.118992	0.117669	0.116342	0.120311	0.116674	0.109309	0.113342	0.113676	0.116342	0.113342	0.118	0.105238	0.124895	0.120969	0.111666	0.121625	0.123263	0.118992	0.117669	0.11601	0.117006	0.117006	0.116674	0.118331	0.115677	0.114678	0.117338	0.11601	0.114678
960.1	0.123525	0.123198	0.128722	0.126456	0.128722	0.122216	0.130977	0.127429	0.126781	0.127105	0.122216	0.125481	0.127105	0.128722	0.126131	0.121888	0.122544	0.121888	0.126131	0.121888	0.123525	0.122216	0.120903	0.125156	0.121231	0.114611	0.117934	0.117934	0.120903	0.117271	0.121888	0.109241	0.128722	0.125806	0.115278	0.124504	0.127105	0.122216	0.121231	0.119256	0.120574	0.121888	0.120903	0.122216	0.118926	0.118595	0.125156	0.120574	0.119586
980.1	0.126131	0.125806	0.13226	0.12969	0.13258	0.12483	0.134177	0.130655	0.12969	0.130012	0.125156	0.129045	0.130334	0.131619	0.129045	0.124504	0.125481	0.125156	0.130977	0.125156	0.127105	0.125481	0.123525	0.128076	0.123852	0.118265	0.121231	0.121888	0.124178	0.120903	0.12483	0.0965624	0.131619	0.128722	0.118265	0.126781	0.130012	0.12483	0.124178	0.122871	0.124178	0.125481	0.124178	0.126456	0.121888	0.121888	0.128722	0.123852	0.122871
1000.1	0.129045	0.129045	0.135769	0.1329	0.136086	0.127753	0.137037	0.133539	0.13258	0.13226	0.127753	0.13226	0.13258	0.134177	0.13226	0.126781	0.128399	0.127753	0.134496	0.128399	0.12969	0.129045	0.126456	0.131619	0.126781	0.120903	0.124178	0.124504	0.127429	0.124178	0.127753	0.104828	0.133858	0.131619	0.120574	0.129045	0.131619	0.127105	0.126781	0.125481	0.128399	0.128722	0.127105	0.12969	0.125156	0.12483	0.13258	0.127429	0.126131
1020.1	0.131298	0.13226	0.137987	0.135133	0.137987	0.12969	0.139249	0.135769	0.135451	0.134496	0.130012	0.134177	0.134496	0.136086	0.133858	0.128722	0.130977	0.130012	0.136721	0.130334	0.131939	0.131298	0.129045	0.133858	0.129368	0.123198	0.126456	0.127429	0.130334	0.126456	0.130012	0.114944	0.135769	0.133219	0.122216	0.130334	0.133539	0.129045	0.129045	0.128076	0.130655	0.131298	0.130012	0.131939	0.127429	0.127105	0.135451	0.130012	0.128722
1040.1	0.132516	0.133475	0.139501	0.137607	0.140445	0.131234	0.140445	0.137607	0.13634	0.135387	0.131234	0.135705	0.135705	0.137607	0.135705	0.129625	0.131875	0.131234	0.137607	0.131875	0.134432	0.133156	0.130912	0.136657	0.131234	0.125091	0.128011	0.128981	0.131555	0.127688	0.131234	0.105442	0.137607	0.135387	0.123786	0.131555	0.134751	0.130269	0.130269	0.128658	0.132516	0.133475	0.131555	0.134432	0.129303	0.129625	0.136974	0.131875	0.130591
1060.1	0.133219	0.134177	0.140822	0.138934	0.142076	0.13226	0.141136	0.138303	0.137354	0.136721	0.13226	0.136721	0.136721	0.138303	0.136721	0.130334	0.13226	0.13226	0.138618	0.13226	0.135451	0.134177	0.13226	0.137354	0.13226	0.126456	0.129368	0.130334	0.1329	0.128722	0.131939	0.10551	0.138303	0.136403	0.124504	0.13226	0.135769	0.131619	0.131298	0.129368	0.133539	0.135133	0.13258	0.135769	0.130334	0.130012	0.138303	0.133219	0.131619
1080.1	0.133794	0.134751	0.141387	0.139816	0.14264	0.133156	0.141701	0.138871	0.137924	0.13634	0.132516	0.136974	0.136657	0.138871	0.136974	0.130912	0.133156	0.132836	0.139186	0.133156	0.136023	0.134751	0.132516	0.13824	0.132836	0.12704	0.129948	0.130912	0.134432	0.129625	0.132196	0.109848	0.13824	0.136023	0.124765	0.132196	0.13634	0.131555	0.131555	0.129948	0.133794	0.136023	0.133475	0.13634	0.130591	0.130912	0.139186	0.134113	0.132516
1100.1	0.133603	0.134241	0.141199	0.140571	0.14339	0.132964	0.141826	0.138366	0.137101	0.13615	0.132644	0.137417	0.137101	0.138997	0.13805	0.131041	0.133283	0.132964	0.139312	0.132964	0.13615	0.134878	0.132644	0.138366	0.133283	0.12717	0.129754	0.131362	0.134878	0.129754	0.132324	0.113342	0.13805	0.13615	0.124895	0.131683	0.135832	0.131041	0.131041	0.129432	0.133922	0.135514	0.133603	0.13615	0.131041	0.13072	0.139627	0.134241	0.132644
1120.1	0.133986	0.134305	0.141262	0.140634	0.14314	0.133028	0.141889	0.138429	0.137797	0.136213	0.133028	0.137797	0.137164	0.13906	0.137797	0.131426	0.133986	0.133028	0.13969	0.133667	0.13653	0.134942	0.133028	0.138429	0.133347	0.12691	0.130141	0.131426	0.134623	0.130141	0.132708	0.110724	0.138429	0.13653	0.125286	0.132067	0.135578	0.131105	0.131105	0.129819	0.133986	0.13653	0.133347	0.136213	0.131426	0.130462	0.140634	0.134623	0.132388
1140.1	0.133603	0.133922	0.141199	0.140257	0.143077	0.132644	0.141826	0.138366	0.138366	0.136467	0.132964	0.137417	0.137101	0.138997	0.137417	0.131041	0.133603	0.133283	0.139942	0.133283	0.136467	0.135196	0.132964	0.138997	0.133283	0.12717	0.130076	0.131041	0.134878	0.130076	0.132644	0.118661	0.138366	0.13615	0.124895	0.132003	0.135514	0.131041	0.131041	0.129432	0.133922	0.135832	0.133283	0.135832	0.13072	0.13072	0.142139	0.134241	0.132644
1160.1	0.133667	0.134305	0.141575	0.141262	0.144699	0.133028	0.142827	0.13906	0.137797	0.13653	0.133028	0.138113	0.137797	0.139375	0.13906	0.131426	0.134305	0.133347	0.140319	0.133986	0.137164	0.135578	0.133028	0.140005	0.133986	0.127882	0.130784	0.131747	0.13526	0.130462	0.133028	0.110051	0.138745	0.137164	0.125286	0.132067	0.135896	0.132388	0.131747	0.129819	0.134623	0.13653	0.133986	0.137164	0.131426	0.130784	0.14314	0.134623	0.132708
1180.1	0.133858	0.134496	0.14145	0.141136	0.144574	0.1329	0.142702	0.138934	0.137987	0.136403	0.133219	0.138618	0.137354	0.139249	0.138618	0.131298	0.134177	0.133219	0.140194	0.133858	0.137354	0.135769	0.133219	0.139879	0.133858	0.127753	0.130977	0.131619	0.135133	0.130334	0.1329	0.109579	0.138618	0.137354	0.125481	0.131939	0.135769	0.131939	0.131619	0.130012	0.134814	0.136403	0.133539	0.136721	0.131298	0.130977	0.143327	0.135133	0.1329
1200.1	0.133858	0.134496	0.141763	0.141136	0.144263	0.13226	0.142389	0.138934	0.137987	0.136403	0.133539	0.137987	0.137671	0.139564	0.138618	0.131939	0.134814	0.133539	0.140194	0.134496	0.137354	0.135451	0.133219	0.139879	0.133858	0.127429	0.130655	0.131619	0.135451	0.130655	0.1329	0.111934	0.138618	0.137037	0.12483	0.131298	0.135133	0.131619	0.131619	0.130012	0.134496	0.136721	0.134177	0.137354	0.131619	0.130655	0.143327	0.134814	0.13258
1220.1	0.1329	0.133539	0.141136	0.140822	0.143951	0.131939	0.142076	0.138618	0.137354	0.135769	0.1329	0.137987	0.137354	0.139249	0.137987	0.131298	0.133858	0.133219	0.140194	0.133858	0.137671	0.135451	0.1329	0.139879	0.133539	0.127429	0.130655	0.131298	0.134814	0.130012	0.13258	0.111599	0.138303	0.136721	0.12483	0.131298	0.135133	0.13226	0.131298	0.129368	0.134177	0.136403	0.133219	0.136403	0.130655	0.130334	0.143327	0.134496	0.13258
1240.1	0.132836	0.133156	0.141073	0.140445	0.143577	0.132196	0.141701	0.138555	0.137291	0.13634	0.133475	0.13824	0.137607	0.139186	0.138871	0.131555	0.134432	0.133475	0.140131	0.133794	0.137291	0.135069	0.132836	0.139186	0.133475	0.126716	0.130269	0.130912	0.134751	0.129948	0.132836	0.112538	0.138555	0.136657	0.124765	0.130591	0.134113	0.131555	0.131234	0.129303	0.134113	0.13634	0.133475	0.136657	0.130912	0.130269	0.143577	0.134113	0.132196
1260.1	0.133156	0.133156	0.141387	0.140759	0.1442	0.132196	0.142014	0.138871	0.137607	0.136023	0.133475	0.13824	0.137924	0.139501	0.138871	0.131555	0.134751	0.133475	0.140445	0.134113	0.137607	0.135387	0.132836	0.139501	0.133475	0.126716	0.130591	0.131555	0.134751	0.130269	0.133475	0.112203	0.138871	0.137607	0.125091	0.130912	0.134751	0.131555	0.131555	0.129948	0.133794	0.136023	0.133475	0.136657	0.131234	0.130269	0.1442	0.134432	0.132516
1280.1	0.133092	0.133092	0.141324	0.140697	0.144138	0.131811	0.141951	0.139123	0.13786	0.136594	0.13373	0.138492	0.138176	0.139438	0.139438	0.13149	0.134368	0.13373	0.140697	0.134368	0.138176	0.135641	0.132772	0.140068	0.133411	0.126651	0.130205	0.131169	0.134368	0.130205	0.133092	0.113475	0.139123	0.137544	0.125351	0.130848	0.135005	0.132132	0.131811	0.129883	0.13405	0.136594	0.13405	0.137227	0.131169	0.130527	0.144761	0.134368	0.132772
1300.1	0.133411	0.13373	0.141951	0.141638	0.145072	0.131811	0.142264	0.139123	0.13786	0.136594	0.13405	0.138808	0.138176	0.140068	0.140068	0.132132	0.134368	0.13373	0.140697	0.134687	0.138176	0.135641	0.132772	0.140382	0.13373	0.126651	0.130527	0.13149	0.135005	0.130527	0.133411	0.112806	0.139438	0.138176	0.125351	0.131169	0.135641	0.132452	0.132452	0.130205	0.134368	0.136277	0.13405	0.136911	0.131169	0.130848	0.144761	0.134687	0.132772
1320.1	0.133603	0.133922	0.142139	0.141826	0.144948	0.132324	0.142139	0.139312	0.13805	0.136784	0.134241	0.138997	0.138366	0.139942	0.139312	0.132644	0.135196	0.133922	0.141199	0.134878	0.138366	0.135514	0.132964	0.140257	0.133603	0.126845	0.130398	0.131362	0.135196	0.130398	0.134241	0.11133	0.139942	0.138366	0.125871	0.131041	0.135196	0.132964	0.132324	0.130398	0.13456	0.136784	0.133922	0.137734	0.131362	0.13072	0.145569	0.13456	0.132964
1340.1	#DIV/0!	#DIV/0!	#DIV/0!	#DIV/0!	#DIV/0!	#DIV/0!	#DIV/0!	#DIV/0!	#DIV/0!	#DIV/0!	#DIV/0!	#DIV/0!	#DIV/0!	#DIV/0!	#DIV/0!	#DIV/0!	#DIV/0!	#DIV/0!	#DIV/0!	#DIV/0!	#DIV/0!	#DIV/0!	#DIV/0!	#DIV/0!	#DIV/0!	#DIV/0!	#DIV/0!	#DIV/0!	#DIV/0!	#DIV/0!	#DIV/0!	#DIV/0!	#DIV/0!	#DIV/0!	#DIV/0!	#DIV/0!	#DIV/0!	#DIV/0!	#DIV/0!	#DIV/0!	#DIV/0!	#DIV/0!	#DIV/0!	#DIV/0!	#DIV/0!	#DIV/0!	#DIV/0!	#DIV/0!	#DIV/0!
1360.1	#DIV/0!	#DIV/0!	#DIV/0!	#DIV/0!	#DIV/0!	#DIV/0!	#DIV/0!	#DIV/0!	#DIV/0!	#DIV/0!	#DIV/0!	#DIV/0!	#DIV/0!	#DIV/0!	#DIV/0!	#DIV/0!	#DIV/0!	#DIV/0!	#DIV/0!	#DIV/0!	#DIV/0!	#DIV/0!	#DIV/0!	#DIV/0!	#DIV/0!	#DIV/0!	#DIV/0!	#DIV/0!	#DIV/0!	#DIV/0!	#DIV/0!	#DIV/0!	#DIV/0!	#DIV/0!	#DIV/0!	#DIV/0!	#DIV/0!	#DIV/0!	#DIV/0!	#DIV/0!	#DIV/0!	#DIV/0!	#DIV/0!	#DIV/0!	#DIV/0!	#DIV/0!	#DIV/0!	#DIV/0!	#DIV/0!
1380.1	#DIV/0!	#DIV/0!	#DIV/0!	#DIV/0!	#DIV/0!	#DIV/0!	#DIV/0!	#DIV/0!	#DIV/0!	#DIV/0!	#DIV/0!	#DIV/0!	#DIV/0!	#DIV/0!	#DIV/0!	#DIV/0!	#DIV/0!	#DIV/0!	#DIV/0!	#DIV/0!	#DIV/0!	#DIV/0!	#DIV/0!	#DIV/0!	#DIV/0!	#DIV/0!	#DIV/0!	#DIV/0!	#DIV/0!	#DIV/0!	#DIV/0!	#DIV/0!	#DIV/0!	#DIV/0!	#DIV/0!	#DIV/0!	#DIV/0!	#DIV/0!	#DIV/0!	#DIV/0!	#DIV/0!	#DIV/0!	#DIV/0!	#DIV/0!	#DIV/0!	#DIV/0!	#DIV/0!	#DIV/0!	#DIV/0!
1400.1	#DIV/0!	#DIV/0!	#DIV/0!	#DIV/0!	#DIV/0!	#DIV/0!	#DIV/0!	#DIV/0!	#DIV/0!	#DIV/0!	#DIV/0!	#DIV/0!	#DIV/0!	#DIV/0!	#DIV/0!	#DIV/0!	#DIV/0!	#DIV/0!	#DIV/0!	#DIV/0!	#DIV/0!	#DIV/0!	#DIV/0!	#DIV/0!	#DIV/0!	#DIV/0!	#DIV/0!	#DIV/0!	#DIV/0!	#DIV/0!	#DIV/0!	#DIV/0!	#DIV/0!	#DIV/0!	#DIV/0!	#DIV/0!	#DIV/0!	#DIV/0!	#DIV/0!	#DIV/0!	#DIV/0!	#DIV/0!	#DIV/0!	#DIV/0!	#DIV/0!	#DIV/0!	#DIV/0!	#DIV/0!	#DIV/0!
1420.1	#DIV/0!	#DIV/0!	#DIV/0!	#DIV/0!	#DIV/0!	#DIV/0!	#DIV/0!	#DIV/0!	#DIV/0!	#DIV/0!	#DIV/0!	#DIV/0!	#DIV/0!	#DIV/0!	#DIV/0!	#DIV/0!	#DIV/0!	#DIV/0!	#DIV/0!	#DIV/0!	#DIV/0!	#DIV/0!	#DIV/0!	#DIV/0!	#DIV/0!	#DIV/0!	#DIV/0!	#DIV/0!	#DIV/0!	#DIV/0!	#DIV/0!	#DIV/0!	#DIV/0!	#DIV/0!	#DIV/0!	#DIV/0!	#DIV/0!	#DIV/0!	#DIV/0!	#DIV/0!	#DIV/0!	#DIV/0!	#DIV/0!	#DIV/0!	#DIV/0!	#DIV/0!	#DIV/0!	#DIV/0!	#DIV/0!
#VALUE!
		LOG0.2	-0.69897
LOG filtered		LOG0.8	-0.09691
Time (min)	BY4741 + pRS315	BY4741 + pRS315	BY4741 + pRS315	BY4741 + pRS315	BY4741 + pRS315	BY4741 + pRS315	BY4741 + pRS315	BY4741 + pRS315	BY4741 + pRS315	BY4741 + pRS315	SNR52::URA3 + pRS315	SNR52::URA3 + pRS315	SNR52::URA3 + pRS315	SNR52::URA3 + pRS315	SNR52::URA3 + pRS315	SNR52::URA3 + pRS315	SNR52::URA3 + pRS315	SNR52::URA3 + pRS315	SNR52::URA3 + pRS315	SNR52::URA3 + pRS315	SNR52::URA3 + dCas9	SNR52::URA3 + dCas9	SNR52::URA3 + dCas9	SNR52::URA3 + dCas9	SNR52::URA3 + dCas9	SNR52::URA3 + dCas9	SNR52::URA3 + dCas9	SNR52::URA3 + dCas9	SNR52::URA3 + dCas9	SNR52::URA3 + dCas9	SNR52::AS1A + dCas9	SNR52::AS1A + dCas9	SNR52::AS1A + dCas9	SNR52::AS1A + dCas9	SNR52::AS1A + dCas9	SNR52::AS1A + dCas9	SNR52::AS1A + dCas9	SNR52::AS1A + dCas9	SNR52::AS1A + dCas9	SNR52::AS1A + dCas9	SNR52::AS1M + dCas9	SNR52::AS1M + dCas9	SNR52::AS1M + dCas9	SNR52::AS1M + dCas9	SNR52::AS1M + dCas9	SNR52::AS1M + dCas9	SNR52::AS1M + dCas9	SNR52::AS1M + dCas9	SNR52::AS1M + dCas9
0.133333
20.1
40.1
60.1
80.1
100.1
120.1
140.1
160.1
180.1
200.1
220.1
240.1																																				-0.659953
260.1																																	-0.69037	-0.692504	-0.686133	-0.617983	-0.667562								-0.69037	-0.673664	-0.69037
280.1																-0.690796															-0.684449	-0.684449	-0.652085	-0.656001	-0.644357	-0.58203	-0.627456	-0.657972	-0.674074	-0.68027	-0.676129	-0.684449	-0.68027	-0.661942	-0.652085	-0.636764	-0.652085	-0.669992	-0.68027
300.1	-0.686555	-0.682354	-0.678195	-0.676129	-0.657972	-0.65014	-0.669992	-0.68027	-0.665949	-0.661942		-0.697236	-0.674074	-0.659953	-0.648204	-0.646276	-0.676129				-0.68867	-0.686555	-0.686555	-0.672028	-0.676129	-0.684449	-0.68867				-0.644357	-0.642446	-0.614751	-0.616544	-0.602408	-0.542421	-0.585361	-0.612966	-0.631155	-0.636764	-0.627456	-0.636764	-0.63865	-0.627456	-0.616544	-0.597223	-0.611189	-0.616544	-0.627456
320.1	-0.629672	-0.627825	-0.624154	-0.62233	-0.606249	-0.601019	-0.620513	-0.627825	-0.613323	-0.606249	-0.650528	-0.64474	-0.62233	-0.609772	-0.601019	-0.599289	-0.624154	-0.64474	-0.64859	-0.656394	-0.637141	-0.63339	-0.637141	-0.624154	-0.624154	-0.635261	-0.639028	-0.646661	-0.650528	-0.650528	-0.595851	-0.592439	-0.561299	-0.567672	-0.556581	-0.505011	-0.542724	-0.56928	-0.585695	-0.587371	-0.575772	-0.587371	-0.584026	-0.579055	-0.572514	-0.553463	-0.562884	-0.57414	-0.580705
340.1	-0.578725	-0.575445	-0.573814	-0.573814	-0.559406	-0.557834	-0.568958	-0.577082	-0.562567	-0.556268	-0.598944	-0.595508	-0.573814	-0.564156	-0.557834	-0.553152	-0.580375	-0.595508	-0.597223	-0.605899	-0.592099	-0.590405	-0.588717	-0.578725	-0.580375	-0.588717	-0.593801	-0.600672	-0.605899	-0.60415	-0.539403	-0.537902	-0.511731	-0.521722	-0.517412	-0.466228	-0.497846	-0.523168	-0.537902	-0.536406	-0.526075	-0.533429	-0.536406	-0.530473	-0.527536	-0.515985	-0.521722	-0.529002	-0.537902
360.1	-0.530767	-0.52491	-0.523458	-0.526367	-0.512014	-0.512014	-0.522011	-0.530767	-0.514847	-0.507799	-0.553463	-0.548828	-0.527829	-0.517698	-0.513428	-0.509199	-0.533726	-0.550367	-0.550367	-0.558148	-0.544242	-0.542724	-0.541211	-0.530767	-0.532244	-0.542724	-0.547294	-0.555019	-0.559721	-0.558148	-0.491336	-0.491336	-0.466482	-0.476774	-0.480697	-0.434624	-0.456429	-0.478078	-0.492684	-0.491336	-0.483332	-0.489991	-0.492684	-0.489991	-0.489991	-0.479385	-0.482013	-0.487316	-0.494036
380.1	-0.479124	-0.475215	-0.475215	-0.477817	-0.466228	-0.466228	-0.473919	-0.479124	-0.464959	-0.45867	-0.504733	-0.501965	-0.480434	-0.47134	-0.4675	-0.466228	-0.487049	-0.500588	-0.501965	-0.508919	-0.500588	-0.497846	-0.495122	-0.485718	-0.488384	-0.495122	-0.501965	-0.508919	-0.513145	-0.511731	-0.445148	-0.445148	-0.423889	-0.436756	-0.445148	-0.394911	-0.414765	-0.436756	-0.447575	-0.445148	-0.441531	-0.448794	-0.451242	-0.448794	-0.447575	-0.436756	-0.440333	-0.445148	-0.452471
400.1	-0.430626	-0.430626	-0.430626	-0.435334	-0.425969	-0.423659	-0.427128	-0.429457	-0.416801	-0.411168	-0.454693	-0.450997	-0.435334	-0.427128	-0.423659	-0.422508	-0.440093	-0.453457	-0.453457	-0.459671	-0.452225	-0.452225	-0.44855	-0.440093	-0.443697	-0.449772	-0.454693	-0.462181	-0.465974	-0.464706	-0.403403	-0.402305	-0.38405	-0.395774	-0.404504	-0.355561	-0.374688	-0.395774	-0.404504	-0.404504	-0.401209	-0.406714	-0.411168	-0.407823	-0.407823	-0.399027	-0.400117	-0.404504	-0.412289
420.1	-0.387004	-0.384892	-0.384892	-0.39126	-0.380698	-0.379656	-0.381743	-0.384892	-0.372429	-0.36734	-0.409827	-0.406492	-0.390192	-0.38384	-0.379656	-0.380698	-0.397723	-0.409827	-0.408713	-0.415443	-0.409827	-0.408713	-0.406492	-0.397723	-0.400991	-0.406492	-0.409827	-0.417709	-0.421132	-0.419988	-0.35932	-0.35932	-0.340845	-0.352421	-0.361311	-0.317674	-0.33517	-0.3534	-0.363312	-0.36231	-0.35932	-0.365321	-0.368353	-0.365321	-0.365321	-0.357338	-0.35932	-0.363312	-0.370387
440.1	-0.342753	-0.340845	-0.34371	-0.351445	-0.338945	-0.339894	-0.341798	-0.341798	-0.329569	-0.326795	-0.364315	-0.36231	-0.348528	-0.342753	-0.338945	-0.340845	-0.357338	-0.365321	-0.364315	-0.370387	-0.365321	-0.363312	-0.36231	-0.354381	-0.358328	-0.365321	-0.36633	-0.371407	-0.375512	-0.375512	-0.3213	-0.32039	-0.301725	-0.313185	-0.323124	-0.280503	-0.298259	-0.316773	-0.324955	-0.323124	-0.3213	-0.326795	-0.330497	-0.327717	-0.327717	-0.3213	-0.324038	-0.326795	-0.333295
460.1	-0.30312	-0.301378	-0.30312	-0.310159	-0.298778	-0.300509	-0.301378	-0.30312	-0.290221	-0.287687	-0.325506	-0.323672	-0.309272	-0.303993	-0.300509	-0.302248	-0.315514	-0.325506	-0.323672	-0.330125	-0.327348	-0.325506	-0.323672	-0.316413	-0.320936	-0.325506	-0.326426	-0.332921	-0.334794	-0.334794	-0.282662	-0.282662	-0.267124	-0.278519	-0.287687	-0.248259	-0.26233	-0.278519	-0.287687	-0.285167	-0.285167	-0.290221	-0.292771	-0.291919	-0.292771	-0.287687	-0.287687	-0.291069	-0.296193
480.1	-0.2652	-0.263603	-0.2652	-0.272459	-0.261219	-0.261219	-0.262013	-0.262807	-0.251037	-0.249492	-0.284833	-0.283162	-0.270026	-0.264401	-0.262013	-0.264401	-0.277366	-0.284833	-0.281498	-0.289883	-0.284833	-0.283162	-0.282329	-0.275724	-0.281498	-0.286509	-0.286509	-0.291579	-0.294136	-0.293282	-0.248721	-0.247952	-0.230623	-0.243364	-0.252588	-0.213249	-0.226945	-0.243364	-0.251037	-0.249492	-0.250264	-0.254925	-0.258061	-0.25649	-0.257275	-0.250264	-0.251812	-0.255707	-0.259637
500.1	-0.226506	-0.225045	-0.227972	-0.23463	-0.224317	-0.224317	-0.224317	-0.225045	-0.214243	-0.212115	-0.24443	-0.243668	-0.232399	-0.227238	-0.223589	-0.226506	-0.239879	-0.245193	-0.243668	-0.250573	-0.245193	-0.24443	-0.243668	-0.237622	-0.242908	-0.247491	-0.246723	-0.252899	-0.254457	-0.254457	-0.213533	-0.212823	-0.198185	-0.209293	-0.217098	-0.180061	-0.193413	-0.209293	-0.217098	-0.215668	-0.214955	-0.219971	-0.223589	-0.221415	-0.221415	-0.216382	-0.217814	-0.219971	-0.225045
520.1	-0.192736	-0.192059	-0.194092	-0.200935	-0.19071	-0.190036	-0.192059	-0.192736	-0.182038	-0.180061	-0.211407	-0.209996	-0.198871	-0.193413	-0.190036	-0.193413	-0.206489	-0.211407	-0.209996	-0.216382	-0.210701	-0.209293	-0.20859	-0.204398	-0.20859	-0.212823	-0.212115	-0.217098	-0.218532	-0.219251	-0.181378	-0.180719	-0.16647	-0.176787	-0.184688	-0.151441	-0.163296	-0.178094	-0.185353	-0.184024	-0.184024	-0.188693	-0.191384	-0.190036	-0.190036	-0.185353	-0.186686	-0.188693	-0.193413
540.1	-0.161151	-0.159267	-0.162412	-0.16813	-0.158015	-0.159267	-0.159267	-0.159267	-0.149354	-0.14691	-0.177832	-0.176526	-0.164944	-0.161151	-0.159894	-0.162412	-0.171985	-0.177832	-0.175874	-0.182435	-0.177832	-0.176526	-0.177178	-0.17134	-0.176526	-0.181774	-0.179799	-0.185087	-0.184422	-0.185752	-0.153663	-0.151811	-0.139662	-0.148742	-0.156145	-0.122629	-0.134304	-0.149967	-0.156145	-0.152427	-0.155523	-0.161151	-0.161151	-0.162412	-0.161151	-0.155523	-0.157391	-0.159267	-0.163676
560.1	-0.130886	-0.129713	-0.131473	-0.137392	-0.128544	-0.129713	-0.130886	-0.130886	-0.121593	-0.119301	-0.145208	-0.145815	-0.134422	-0.129713	-0.129713	-0.131473	-0.142788	-0.146423	-0.144602	-0.151318	-0.147642	-0.145208	-0.145815	-0.140381	-0.144602	-0.150089	-0.148864	-0.153168	-0.153787	-0.155026	-0.125634	-0.122744	-0.11025	-0.120445	-0.12796	-0.0986507	-0.108017	-0.121019	-0.127378	-0.126796	-0.127378	-0.131473	-0.13324	-0.13265	-0.13324	-0.129128	-0.130299	-0.131473	-0.136201
580.1	-0.103584	-0.103033	-0.104136	-0.108574	-0.100836	-0.102483	-0.104136	-0.103584			-0.11702	-0.116452	-0.106349	-0.102483	-0.100836	-0.104688	-0.114187	-0.118729	-0.115885	-0.122168	-0.118729	-0.11702	-0.11702	-0.111933	-0.116452	-0.121593	-0.120445	-0.124476	-0.125055	-0.126215	-0.100289	-0.0975619			-0.102483			-0.0970186	-0.103033	-0.101385	-0.103033	-0.106904	-0.10746	-0.106904	-0.10746	-0.104136	-0.105241	-0.106349	-0.11081
600.1																												-0.098106	-0.098106	-0.0997421
620.1
640.1
660.1
680.1
700.1
720.1
740.1
760.1
780.1
800.1
820.1
840.1
860.1
880.1
900.1
920.1
940.1
960.1
980.1
1000.1
1020.1
1040.1
1060.1
1080.1
1100.1
1120.1
1140.1
1160.1
1180.1
1200.1
1220.1
1240.1
1260.1
1280.1
1300.1
1320.1
1340.1	#DIV/0!	#DIV/0!	#DIV/0!	#DIV/0!	#DIV/0!	#DIV/0!	#DIV/0!	#DIV/0!	#DIV/0!	#DIV/0!	#DIV/0!	#DIV/0!	#DIV/0!	#DIV/0!	#DIV/0!	#DIV/0!	#DIV/0!	#DIV/0!	#DIV/0!	#DIV/0!	#DIV/0!	#DIV/0!	#DIV/0!	#DIV/0!	#DIV/0!	#DIV/0!	#DIV/0!	#DIV/0!	#DIV/0!	#DIV/0!	#DIV/0!	#DIV/0!	#DIV/0!	#DIV/0!	#DIV/0!	#DIV/0!	#DIV/0!	#DIV/0!	#DIV/0!	#DIV/0!	#DIV/0!	#DIV/0!	#DIV/0!	#DIV/0!	#DIV/0!	#DIV/0!	#DIV/0!	#DIV/0!	#DIV/0!
1360.1	#DIV/0!	#DIV/0!	#DIV/0!	#DIV/0!	#DIV/0!	#DIV/0!	#DIV/0!	#DIV/0!	#DIV/0!	#DIV/0!	#DIV/0!	#DIV/0!	#DIV/0!	#DIV/0!	#DIV/0!	#DIV/0!	#DIV/0!	#DIV/0!	#DIV/0!	#DIV/0!	#DIV/0!	#DIV/0!	#DIV/0!	#DIV/0!	#DIV/0!	#DIV/0!	#DIV/0!	#DIV/0!	#DIV/0!	#DIV/0!	#DIV/0!	#DIV/0!	#DIV/0!	#DIV/0!	#DIV/0!	#DIV/0!	#DIV/0!	#DIV/0!	#DIV/0!	#DIV/0!	#DIV/0!	#DIV/0!	#DIV/0!	#DIV/0!	#DIV/0!	#DIV/0!	#DIV/0!	#DIV/0!	#DIV/0!
1380.1	#DIV/0!	#DIV/0!	#DIV/0!	#DIV/0!	#DIV/0!	#DIV/0!	#DIV/0!	#DIV/0!	#DIV/0!	#DIV/0!	#DIV/0!	#DIV/0!	#DIV/0!	#DIV/0!	#DIV/0!	#DIV/0!	#DIV/0!	#DIV/0!	#DIV/0!	#DIV/0!	#DIV/0!	#DIV/0!	#DIV/0!	#DIV/0!	#DIV/0!	#DIV/0!	#DIV/0!	#DIV/0!	#DIV/0!	#DIV/0!	#DIV/0!	#DIV/0!	#DIV/0!	#DIV/0!	#DIV/0!	#DIV/0!	#DIV/0!	#DIV/0!	#DIV/0!	#DIV/0!	#DIV/0!	#DIV/0!	#DIV/0!	#DIV/0!	#DIV/0!	#DIV/0!	#DIV/0!	#DIV/0!	#DIV/0!
1400.1	#DIV/0!	#DIV/0!	#DIV/0!	#DIV/0!	#DIV/0!	#DIV/0!	#DIV/0!	#DIV/0!	#DIV/0!	#DIV/0!	#DIV/0!	#DIV/0!	#DIV/0!	#DIV/0!	#DIV/0!	#DIV/0!	#DIV/0!	#DIV/0!	#DIV/0!	#DIV/0!	#DIV/0!	#DIV/0!	#DIV/0!	#DIV/0!	#DIV/0!	#DIV/0!	#DIV/0!	#DIV/0!	#DIV/0!	#DIV/0!	#DIV/0!	#DIV/0!	#DIV/0!	#DIV/0!	#DIV/0!	#DIV/0!	#DIV/0!	#DIV/0!	#DIV/0!	#DIV/0!	#DIV/0!	#DIV/0!	#DIV/0!	#DIV/0!	#DIV/0!	#DIV/0!	#DIV/0!	#DIV/0!	#DIV/0!
1420.1	#DIV/0!	#DIV/0!	#DIV/0!	#DIV/0!	#DIV/0!	#DIV/0!	#DIV/0!	#DIV/0!	#DIV/0!	#DIV/0!	#DIV/0!	#DIV/0!	#DIV/0!	#DIV/0!	#DIV/0!	#DIV/0!	#DIV/0!	#DIV/0!	#DIV/0!	#DIV/0!	#DIV/0!	#DIV/0!	#DIV/0!	#DIV/0!	#DIV/0!	#DIV/0!	#DIV/0!	#DIV/0!	#DIV/0!	#DIV/0!	#DIV/0!	#DIV/0!	#DIV/0!	#DIV/0!	#DIV/0!	#DIV/0!	#DIV/0!	#DIV/0!	#DIV/0!	#DIV/0!	#DIV/0!	#DIV/0!	#DIV/0!	#DIV/0!	#DIV/0!	#DIV/0!	#DIV/0!	#DIV/0!	#DIV/0!
#VALUE!
SLOPE	0.0020868	0.00207576	0.00205417	0.00202662	0.0019992	0.00197713	0.00204043	0.00207803	0.00211005	0.00209007	0.00206877	0.00208976	0.00203881	0.00200579	0.00197801	0.00197912	0.00202176	0.00204519	0.00206478	0.00206999	0.00205634	0.00205367	0.00205223	0.00202144	0.00200889	0.00202781	0.00205621	0.00199042	0.00200958	0.00199862	0.00197934	0.00198194	0.00198064	0.00195528	0.00185085	0.00178427	0.00190048	0.00189446	0.0019348	0.00195396	0.00191322	0.00193165	0.00192367	0.0018847	0.00186915	0.00182133	0.0018658	0.00188106	0.00190062
Doubling time (min)	144.254	145.021	146.546	148.538	150.575	152.256	147.532	144.863	142.665	144.029	145.512	144.05	147.65	150.081	152.188	152.103	148.895	147.189	145.793	145.426	146.391	146.582	146.684	148.919	149.849	148.451	146.4	151.24	149.798	150.619	152.086	151.886	151.986	153.957	162.645	168.713	158.397	158.901	155.587	154.062	157.342	155.84	156.487	159.723	161.052	165.28	161.341	160.032	158.385
	BY4741 + pRS315										SNR52::URA3 + pRS315										SNR52::URA3 + dCas9										SNR52::AS1A + dCas9										SNR52::AS1M + dCas9
AV. Doubling time (min)	146.628										147.889										148.493										156.822										159.383
Standard dev	3.16051										3.42005										1.45509										7.12266										3.54175
Standard error	0.99944										1.08151										0.46014										2.25238										1.12
											v BY +pRS										v snR::URA + pRS										v snr::URA + dCas9										v snr::URA + dCas9
T test (v own WT equivalent)											0.355429										0.582561										0.00024632										5.66398e-09
T test v BY + pRS											0.355429										0.119285										6.9883e-05										1.35712e-08
	BY4741 + pRS315	snR52::URA3 + pRS315	snR52::URA3 + dCas9	snR52::AS1A + dCas9	snR52::AS1M + dCas9
AV. Doubling time (min)	146.628	147.889	148.493	156.822	159.383
Standard error	0.99944	1.08151	0.46014	2.25238	1.12
T test		0.355429	0.582561	0.00024632	5.66398e-09
		v BY +pRS	v snR::URA + pRS	v snr::URA + dCas9	v snr::URA + dCas9		Growth is significantly reduced when AS1A/AS1M are expressed
T test v BY + pRS		0.355429	0.119285	6.9883e-05	1.35712e-08
relative to WT
	BY4741 + pRS315	SNR52::URA3 + pRS315	SNR52::URA3 + dCas9	SNR52::AS1A + dCas9	SNR52::AS1M + dCas9
AV. Doubling time (min)	1	1.0086	1.01272	1.06952	1.08699
Standard error (scaled)	0.00681616	0.0073759	0.00313814	0.0153612	0.00763838
							N.B. AS1A = AS+148NT clicked
							AS1M = AS+148NT full-length synthetic
[truncated: 41 more columns]

## Sheet: 5. ALL HMS2 AS Northerns
HMS2 H1 AS RAW			*Please read 1. Notes to understand strain naming*									AVERAGE RAW
	CRISPR 1	CRISPR 2	CRISPR 3	CRISPR 4	URA3 v AS1 1	URA3 v AS1 2	probe series 1	probe series 2					Average	SEM n=8	P value
snR52::URA3	18840.3	15808.7	30914.8	33315.9	67592.5	78923.2	13500.6	15591				snR52::URA3	34310.9	8939.89
snR52::URA3 xrn1	33898.6	40642	50271.6	77601	95029.2	70702.1	15571	16039.8				AS1A	18028	4801.98	0.01141
S1A	19094.1	16742.1	38457.7	39629.3								AS1M	12907.6	3733.59	0.00878587
S2A	18619.3	14660.7	41030.5	28376.5								snR52::URA3 xrn1	49969.4	10267.5
S3A	20743.4	14710.6	43481.5	28414.7								AS1A xrn1	28403.1	5371.74	0.00667641
S1A xrn1	39662.6	35553.2	65703.4	62286.9								AS1M xrn1	26339.5	4567.44	0.00713493
S2A xrn1	35355.6	33154.5	61936.6	53271.9
S3A xrn1	31662.1	37662.7	57913.4	0
S1M	15267.9	11400	40035.6	20333.1
S2M	13177.9	13704.4	41926.5	18213.9
S3M	15661.3	15309.7	40733.8	20216.4
S1M xrn1	33245.5	29950.5	58893.9	51965.9
S2M xrn1	35589.5	30272.9	51594.9	60219.4
S3M xrn1	34300.1	28678.5	48429.8	65673.1
snR52::URA3	26652.8	11909.1	34188.9	23038.5
snR52::URA3 xrn1	42737.2	26723.4	56589.3	63450.5
AS1A	20849.6	6094.15	14871.1	10902.5	35089.3	41713.1	7061.46	7642.95
AS2A	27111.9	11383	29278.8	15393.6
AS3A	25580.2	16756.9	27995.9	21346.6
AS1A xrn1	22443.8	28963.2	36398.2	31521.6	53198.3	37889.9	7458.99	9351.09
AS2A xrn1	22095.9	36716.1	45636.2	49303.9
AS3A xrn1	21854.9	37705.9	54195.9	59167.6
AS1M	3774.38	9116.81	15556.3	6413.76	33580.2	23184.5	5554.24	6080.36
AS2M	9830.98	8837.1	21701.2	12552.6
AS3M	16740.9	11331.2	25668.4	21579.2
AS1M xrn1	23530.1	15238.9	31598.5	30636.4	50030.3	34156.3	12793.5	12732.2
AS2M xrn1	16282	20992.9	23079.7	53657.2
AS3M xrn1	39501.3	22247.6	51616.9	64897.1
HMS2 H1 AS relative to snR52::URA3 on EACH gel												AVERAGE relative
	CRISPR 1	CRISPR 2	CRISPR 3	CRISPR 4	URA3 v AS1 1	URA3 v AS1 2	sliding 1	sliding 2					Average	SEM n=8	P value
snR52::URA3	1	1	1	1	1	1	1	1				snR52::URA3	1	0
snR52::URA3 xrn1	1.79926	2.57086	1.62613	2.32925	1.40591	0.895834	1.15336	1.02878			AS1A	Clicked	0.532889	0.0372995	4.77231e-06
S1A	1.01347	1.05904	1.24399	1.1895	0	0	0	0			AS1M	Full-length	0.404064	0.0653221	3.90483e-05
S2A	0.988274	0.927379	1.32721	0.85174	0	0	0	0				snR52::URA3 xrn1	1.60117	0.214395													Just AS1
S3A	1.10101	0.930534	1.40649	0.852886	0	0	0	0			AS1A xrn1	Clicked xrn1	1.01579	0.227153	0.000544939
S1A xrn1	2.1052	2.24896	2.1253	1.86958	0	0	0	0			AS1M xrn1	Full-length xrn1	0.91921	0.101753	0.0014875
S2A xrn1	1.8766	2.09723	2.00346	1.59899	0	0	0	0
S3A xrn1	1.68055	2.3824	1.87332	0	0	0	0	0
S1M	0.810384	0.721122	1.29503	0.610311	0	0	0	0
S2M	0.699452	0.866891	1.35619	0.546703	0	0	0	0				AVERAGE relative
S3M	0.83127	0.968432	1.31761	0.606808	0	0	0	0					Average	SEM n=4-8	P value	n
S1M xrn1	1.7646	1.89455	1.90504	1.55979	0	0	0	0				snR52::URA3	1	0		8
S2M xrn1	1.88901	1.91495	1.66894	1.80753	0	0	0	0			AS1	Clicked	0.532889	0.0372995	4.77231e-06	8
S3M xrn1	1.82057	1.81409	1.56655	1.97122	0	0	0	0				Full-length	0.404064	0.0653221	3.90483e-05	8
snR52::URA3	1	1	1	1	0	0	0	0			AS2	Clicked	0.874401	0.0763136	0.198351	4
snR52::URA3 xrn1	1.60348	2.24396	1.65519	2.75411	0	0	0	0				Full-length	0.572625	0.0789818	0.0123779	4
AS1A	0.782265	0.511724	0.434969	0.473229	0.519131	0.528528	0.523047	0.490216			AS3	Clicked	1.02806	0.129867	0.842775	4
AS2A	1.01723	0.955826	0.856383	0.668169	0	0	0	0				Full-length	0.816757	0.0777097	0.0995756	4
AS3A	0.959755	1.40708	0.818859	0.926563	0	0	0	0
AS1A xrn1	0.842079	2.43203	1.06462	1.36822	0.787045	0.480086	0.552492	0.599775
AS2A xrn1	0.829028	3.08304	1.33483	2.14006	0	0	0	0
AS3A xrn1	0.819984	3.16615	1.58519	2.5682	0	0	0	0					Average	SEM n=8
AS1M	0.141613	0.765536	0.45501	0.278393	0.496804	0.29376	0.411406	0.389992				snR52::URA3	1	0
AS2M	0.368854	0.742049	0.634744	0.544853	0	0	0	0				AS1	0.532889	0.0372995
AS3M	0.628111	0.951476	0.750781	0.936658	0	0	0	0				AS2	0.874401	0.0763136
AS1M xrn1	0.882838	1.2796	0.924232	1.32979	0.740176	0.432779	0.947621	0.816641				AS3	1.02806	0.129867
AS2M xrn1	0.610892	1.76277	0.675064	2.32902	0	0	0	0				AS1 Full-length	0.404064	0.0653221
AS3M xrn1	1.48207	1.86812	1.50975	2.8169	0	0	0	0

## Sheet: 6. HMS2 expts 1&2
data minus background
all + dCas9	CRISPR 1							CRISPR 2
	HMS2 S	HMS2 S truncated		HMS2 AS		BAT2 S			HMS2 S	HMS2 S truncated		HMS2 AS		BAT2 S
snR52::URA3	23962.9	8954.79		18840.3		15021.2			22211.5	13926.9		15808.7		18571.2
snR52::URA3 xrn1	28657.2	11561.2		33898.6		35808.4			37432.5	34770.3		40642		53382.5
S1A	17167.4	5564.1		19094.1		22513.6			25382.1	17920.1		16742.1		18038.3
S2A	18977.8	8100.33		18619.3		20027.7			27359.1	19011.6		14660.7		21064.6
S3A	19459.5	8530.79		20743.4		25749.1			20831.4	16888.1		14710.6		19950.5
S1A xrn1	29353.5	18314.2		39662.6		47525.6			28258.8	25963.8		35553.2		37205.1
S2A xrn1	28069.1	15418		35355.6		40255.4			30560.3	30224.6		33154.5		37365.7
S3A xrn1	28051.8	15561.9		31662.1		41537.5			28425.2	19188.5		37662.7		38311.9
S1M	24164.1	14813.9		15267.9		24379.1			19743.3	11628		11400		18305.9
S2M	22480.8	18781.9		13177.9		31555.7			17317.4	6361.38		13704.4		19399.1
S3M	16665.6	12058.7		15661.3		23904.1			13171.4	4584.91		15309.7		17448.5
S1M xrn1	26249.2	21299.5		33245.5		32440.2			23296.8	11582		29950.5		23951.1
S2M xrn1	29171.6	23869.2		35589.5		33342.2			23851.5	9502.15		30272.9		20411.4
S3M xrn1	27024.2	23778.3		34300.1		33137.7			24445.2	15376.4		28678.5		18059.6
snR52::URA3	21681.1	6711.15		26652.8		19365.6			16759.9	8998.79		11909.1		15178.8
snR52::URA3 xrn1	28735.3	13832.7		42737.2		45617.3			28134.3	21574.3		26723.4		51332.8
AS1A	15491.3	19851.1		20849.6		22959.2			19268.8	21683.3		6094.15		17631.1
AS2A	17092.5	9671.98		27111.9		25163.6			24860.6	9526.69		11383		11861.2
AS3A	11819.3	6799.74		25580.2		27619.8			25865.1	12725.9		16756.9		14814.9
AS1A xrn1	13856.3	16751.8		22443.8		42492.6			24865.1	35347.2		28963.2		24080.4
AS2A xrn1	16852.5	7848.05		22095.9		52581.4			32000.6	24889.9		36716.1		25606.2
AS3A xrn1	20216	13419.1		21854.9		44885.2			22968	15544.1		37705.9		23662.6
AS1M	16182.5	15966.6		3774.38		36112.2			16855.8	17969.1		9116.81		13053.8
AS2M	19975.1	10921.7		9830.98		38923			18345.1	9079.23		8837.1		17321.2
AS3M	22146.8	8052.62		16740.9		32181.6			16007.1	6008.47		11331.2		25203.5
AS1M xrn1	26306.3	28360.2		23530.1		36962.3			18023.7	23320.5		15238.9		36049.7
AS2M xrn1	26183.6	10992.4		16282		19459.1	not xrn1		21520.7	18333.2		20992.9		28784.6
AS3M xrn1	36430.7	25722.5		39501.3		33511.9			28452.9	20730.8		22247.6		27233.6
Normalised to snR52::URA3	CRISPR 1					CRISPR 2					AVERAGE				SEM
	HMS2 S	HMS2 S truncated	HMS2 AS	BAT2 S		HMS2 S	HMS2 S truncated	HMS2 AS	BAT2 S		HMS2 S	HMS2 S truncated	HMS2 AS	BAT2 S	HMS2 S	HMS2 S truncated	HMS2 AS	BAT2 S		HMS2: full-length + truncated
snR52::URA3	1	1	1	1		1	1	1	1		1	1	1	1	0	0	0	0		2
snR52::URA3 xrn1	1.1959	1.29106	1.79926	2.38387		1.68527	2.49664	2.57086	2.87448		1.44059	1.89385	2.18506	2.62917	0.244686	0.602789	0.385796	0.245306		3.33443
S1A	0.716417	0.621355	1.01347	1.49879		1.14275	1.28673	1.05904	0.971306		0.929581	0.954042	1.03626	1.23505	0.213164	0.332687	0.0227842	0.263743		1.88362
S2A	0.791968	0.90458	0.988274	1.3333		1.23175	1.3651	0.927379	1.13426		1.01186	1.13484	0.957826	1.23378	0.219892	0.23026	0.0304474	0.0995177		2.1467
S3A	0.81207	0.952651	1.10101	1.71419		0.937865	1.21263	0.930534	1.07427		0.874967	1.08264	1.01577	1.39423	0.0628974	0.129989	0.0852398	0.319959		1.95761
S1A xrn1	1.22496	2.04518	2.1052	3.16391		1.27226	1.86429	2.24896	2.00338		1.24861	1.95474	2.17708	2.58364	0.0236503	0.0904441	0.0718774	0.580267		3.20335
S2A xrn1	1.17136	1.72176	1.8766	2.67991		1.37588	2.17024	2.09723	2.01202		1.27362	1.946	1.98691	2.34597	0.102261	0.224239	0.110314	0.333943		3.21962
S3A xrn1	1.17064	1.73783	1.68055	2.76527		1.27975	1.37781	2.3824	2.06297		1.22519	1.55782	2.03147	2.41412	0.0545573	0.180012	0.350923	0.351146		2.78301
S1M	1.0084	1.65429	0.810384	1.62298		0.888879	0.834936	0.721122	0.985712		0.948637	1.24462	0.765753	1.30435	0.0597586	0.409679	0.044631	0.318636		2.19325
S2M	0.938152	2.09742	0.699452	2.10075		0.779658	0.45677	0.866891	1.04458		0.858905	1.27709	0.783171	1.57267	0.0792469	0.820324	0.0837195	0.528086		2.136
S3M	0.695475	1.34662	0.83127	1.59136		0.593001	0.329214	0.968432	0.939543		0.644238	0.837916	0.899851	1.26545	0.0512371	0.508703	0.0685813	0.32591		1.48215
S1M xrn1	1.09541	2.37856	1.7646	2.15964		1.04886	0.831631	1.89455	1.28969		1.07214	1.6051	1.82957	1.72466	0.0232755	0.773465	0.0649794	0.434973		2.67723
S2M xrn1	1.21737	2.66553	1.88901	2.21968		1.07384	0.68229	1.91495	1.09909		1.1456	1.67391	1.90198	1.65939	0.0717666	0.991618	0.0129696	0.560298		2.81951
S3M xrn1	1.12775	2.65537	1.82057	2.20607		1.10057	1.10409	1.81409	0.97245		1.11416	1.87973	1.81733	1.58926	0.0135946	0.775642	0.00323905	0.616809		2.99389
snR52::URA3	1	1	1	1		1	1	1	1		1	1	1	1	0	0	0	0		2
snR52::URA3 xrn1	1.32536	2.06115	1.60348	2.35558		1.67867	2.39747	2.24396	3.38187		1.50202	2.22931	1.92372	2.86873	0.176655	0.168159	0.32024	0.513143		3.73133
AS1A	0.714509	2.95792	0.782265	1.18557		1.1497	2.40958	0.511724	1.16156		0.932105	2.68375	0.646995	1.17356	0.217595	0.274167	0.13527	0.012005		3.61586
AS2A	0.78836	1.44118	1.01723	1.2994		1.48334	1.05866	0.955826	0.78143		1.13585	1.24992	0.986526	1.04041	0.34749	0.191258	0.0307	0.258984		2.38577
AS3A	0.545144	1.0132	0.959755	1.42623		1.54327	1.41418	1.40708	0.976024		1.04421	1.21369	1.18342	1.20113	0.499065	0.200491	0.22366	0.225103		2.2579
AS1A xrn1	0.639097	2.49611	0.842079	2.19423		1.48361	3.92799	2.43203	1.58645		1.06135	3.21205	1.63705	1.89034	0.422257	0.715939	0.794976	0.303892		4.27341
AS2A xrn1	0.777291	1.1694	0.829028	2.7152		1.90936	2.76592	3.08304	1.68697		1.34332	1.96766	1.95603	2.20108	0.566034	0.798258	1.127	0.514116		3.31099
AS3A xrn1	0.932424	1.99952	0.819984	2.31778		1.37042	1.72735	3.16615	1.55892		1.15142	1.86344	1.99307	1.93835	0.218996	0.136084	1.17308	0.37943		3.01486
AS1M	0.746388	2.37911	0.141613	1.86476		1.00572	1.99684	0.765536	0.859999		0.876055	2.18797	0.453574	1.36238	0.129667	0.191137	0.311962	0.502381		3.06403
AS2M	0.921314	1.62739	0.368854	2.00991		1.09459	1.00894	0.742049	1.14114		1.00795	1.31817	0.555451	1.57552	0.0866359	0.309228	0.186598	0.434383		2.32612
AS3M	1.02148	1.19989	0.628111	1.66179		0.955086	0.667697	0.951476	1.66044		0.988283	0.933792	0.789794	1.66112	0.0331971	0.266094	0.161682	0.000678565		1.92207
AS1M xrn1	1.21333	4.22583	0.882838	1.90866		1.07541	2.59151	1.2796	2.375		1.14437	3.40867	1.08122	2.14183	0.0689613	0.817158	0.198383	0.233172		4.55304
AS2M xrn1	1.20767	1.63794	0.610892	1.00483	not xrn1!	1.28406	2.0373	1.76277	1.89637		1.28406	2.0373	1.76277	1.89637						3.32136
AS3M xrn1	1.6803	3.8328	1.48207	1.73049		1.69768	2.30373	1.86812	1.79418		1.68899	3.06826	1.6751	1.76233	0.00869384	0.764537	0.193028	0.0318464		4.75725													.
copied from above for t test	CRISPR 1	CRISPR 2
	HMS2 S	HMS2 S	t test	Figure 3 - Figure Supplement 1
snR52::URA3	1	1
snR52::URA3 xrn1	1.1959	1.68527	0.213562
S1A	0.716417	1.14275	0.77253
S2A	0.791968	1.23175	0.961892
S3A	0.81207	0.937865	0.185162
S1A xrn1	1.22496	1.27226	0.516592
S2A xrn1	1.17136	1.37588	0.593283
S3A xrn1	1.17064	1.27975	0.480776
S1M	1.0084	0.888879	0.480637
S2M	0.938152	0.779658	0.21696
S3M	0.695475	0.593001	0.0201181
S1M xrn1	1.09541	1.04886	0.213562
S2M xrn1	1.21737	1.07384	0.77253
S3M xrn1	1.12775	1.10057	0.961892

## Sheet: 7. HMS2 expts 3&4
data minus background
all + dCas9	CRISPR 1							CRISPR 2
	HMS2 S	HMS2 S truncated		HMS2 AS					HMS2 S	HMS2 S truncated		HMS2 AS
snR52::URA3	40475.3	26516		30914.8					37613.4	23546.3		33315.9
snR52::URA3 xrn1	61334.8	49487.6		50271.6					39393.9	29254.8		77601
S1A	41275.6	30892.2		38457.7					42082.9	23302.7		39629.3
S2A	45105.7	35162.7		41030.5					43520.9	26557.4		28376.5
S3A	33968.7	29817.4		43481.5					29620.2	26189.7		28414.7
S1A xrn1	67144	59175.7		65703.4					59680.3	53388.2		62286.9
S2A xrn1	61175.5	57686.6		61936.6					64162.9	60005.3		53271.9
S3A xrn1	60402	62150.3		57913.4
S1M	40203.5	29238.2		40035.6					27639.8	16589.4		20333.1
S2M	34345.5	26311.1		41926.5					24636.4	16981.1		18213.9
S3M	25084.4	25335.4		40733.8					22721.5	20120.2		20216.4
S1M xrn1	44356.1	39000		58893.9					43851.5	34394.9		51965.9
S2M xrn1	44442.9	43708.4		51594.9					45877	40330.9		60219.4
S3M xrn1	34216.4	42464.9		48429.8					39215.7	34052		65673.1
snR52::URA3	39414.7	20286.8		34188.9					37074.4	26399.7		23038.5
snR52::URA3 xrn1	65960.4	46705.8		56589.3					50231.7	54446.4		63450.5
AS1A	41935.1	42325		14871.1					32335.9	48047.9		10902.5
AS2A	47822.3	32492.8		29278.8					32198.7	26668.7		15393.6
AS3A	44533.6	31113.8		27995.9					32282.2	22136.4		21346.6
AS1A xrn1	55613.7	70104.3		36398.2					42961.7	65601.7		31521.6
AS2A xrn1	63265.7	62294.1		45636.2								49303.9
AS3A xrn1	58011.2	58922.6		54195.9					38030.7	38989.3		59167.6
AS1M	37574.5	33809.3		15556.3					24810.3	40156.1		6413.76
AS2M	38673.3	22944.8		21701.2					29309.1	24025		12552.6
AS3M	33213	19011.7		25668.4					25494.1	19802.6		21579.2
AS1M xrn1	43081.4	47847.9		31598.5					40151.6	56967		30636.4
AS2M xrn1	21915	19781.8		23079.7					44130.1	35489.1		53657.2
AS3M xrn1	37197.6	42900.3		51616.9								64897.1
Normalised to snR52::URA3	CRISPR 1					CRISPR 2					AVERAGE				SEM
	HMS2 S	HMS2 S truncated	HMS2 AS	BAT2 S		HMS2 S	HMS2 S truncated	HMS2 AS	BAT2 S		HMS2 S	HMS2 S truncated	HMS2 AS	BAT2 S	HMS2 S	HMS2 S truncated	HMS2 AS	BAT2 S		HMS2: full-length + truncated
snR52::URA3	1	1	1	#DIV/0!		1	1	1	#DIV/0!		1	1	1	#DIV/0!	0	0	0	#DIV/0!		2
snR52::URA3 xrn1	1.51536	1.86633	1.62613	#DIV/0!		1.04734	1.24244	2.32925	#DIV/0!		1.28135	1.55438	1.97769	#DIV/0!	0.234014	0.311948	0.351558	#DIV/0!		2.83573
S1A	1.01977	1.16504	1.24399	#DIV/0!		1.11883	0.989652	1.1895	#DIV/0!		1.0693	1.07735	1.21674	#DIV/0!	0.0495269	0.0876949	0.0272429	#DIV/0!		2.14665
S2A	1.1144	1.3261	1.32721	#DIV/0!		1.15706	1.12788	0.85174	#DIV/0!		1.13573	1.22699	1.08948	#DIV/0!	0.0213288	0.0991073	0.237735	#DIV/0!		2.36272
S3A	0.839244	1.12451	1.40649	#DIV/0!		0.78749	1.11226	0.852886	#DIV/0!		0.813367	1.11839	1.12969	#DIV/0!	0.0258771	0.0061236	0.276804	#DIV/0!		1.93175
S1A xrn1	1.65889	2.2317	2.1253	#DIV/0!		1.58667	2.26737	1.86958	#DIV/0!		1.62278	2.24954	1.99744	#DIV/0!	0.0361064	0.0178341	0.127861	#DIV/0!		3.87232
S2A xrn1	1.51143	2.17554	2.00346	#DIV/0!		1.70585	2.54839	1.59899	#DIV/0!		1.60864	2.36197	1.80122	#DIV/0!	0.097212	0.186425	0.202233	#DIV/0!		3.97061
S3A xrn1	1.49232	2.34388	1.87332	#DIV/0!		0	0	0	#DIV/0!		1.49232	2.34388	0.93666	#DIV/0!	#DIV/0!	#DIV/0!	0.93666	#DIV/0!		3.8362
S1M	0.993284	1.10266	1.29503	#DIV/0!		0.734838	0.704542	0.610311	#DIV/0!		0.864061	0.903603	0.95267	#DIV/0!	0.129223	0.199061	0.342359	#DIV/0!		1.76766
S2M	0.848554	0.992273	1.35619	#DIV/0!		0.65499	0.721178	0.546703	#DIV/0!		0.751772	0.856725	0.951448	#DIV/0!	0.0967818	0.135548	0.404745	#DIV/0!		1.6085
S3M	0.619745	0.955476	1.31761	#DIV/0!		0.60408	0.854497	0.606808	#DIV/0!		0.611913	0.904986	0.962211	#DIV/0!	0.00783224	0.05049	0.355403	#DIV/0!		1.5169
S1M xrn1	1.09588	1.47081	1.90504	#DIV/0!		1.16585	1.46073	1.55979	#DIV/0!		1.13086	1.46577	1.73241	#DIV/0!	0.0349827	0.00504092	0.172622	#DIV/0!		2.59664
S2M xrn1	1.09802	1.64838	1.66894	#DIV/0!		1.2197	1.71283	1.80753	#DIV/0!		1.15886	1.68061	1.73823	#DIV/0!	0.0608358	0.0322255	0.0692957	#DIV/0!		2.83947
S3M xrn1	0.845364	1.60148	1.56655	#DIV/0!		1.0426	1.44617	1.97122	#DIV/0!		0.943981	1.52383	1.76889	#DIV/0!	0.0986176	0.0776556	0.202334	#DIV/0!		2.46781
snR52::URA3	1	1	1	#DIV/0!		1	1	1	#DIV/0!		1	1	1	#DIV/0!	0	0	0	#DIV/0!		2
snR52::URA3 xrn1	1.6735	2.30228	1.65519	#DIV/0!		1.35489	2.06239	2.75411	#DIV/0!		1.51419	2.18233	2.20465	#DIV/0!	0.159304	0.119946	0.549458	#DIV/0!		3.69653
AS1A	1.06394	2.08634	0.434969	#DIV/0!		0.87219	1.82001	0.473229	#DIV/0!		0.968067	1.95318	0.454099	#DIV/0!	0.0958775	0.133161	0.01913	#DIV/0!		2.92124
AS2A	1.21331	1.60167	0.856383	#DIV/0!		0.86849	1.01019	0.668169	#DIV/0!		1.0409	1.30593	0.762276	#DIV/0!	0.17241	0.295742	0.0941067	#DIV/0!		2.34683
AS3A	1.12987	1.5337	0.818859	#DIV/0!		0.870741	0.838511	0.926563	#DIV/0!		1.00031	1.1861	0.872711	#DIV/0!	0.129566	0.347594	0.0538518	#DIV/0!		2.18641
AS1A xrn1	1.41099	3.45567	1.06462	#DIV/0!		1.1588	2.48494	1.36822	#DIV/0!		1.28489	2.9703	1.21642	#DIV/0!	0.126096	0.485363	0.151797	#DIV/0!		4.25519
AS2A xrn1	1.60513	3.07068	1.33483	#DIV/0!		0	0	2.14006	#DIV/0!		1.60513	3.07068	1.73745	#DIV/0!	#DIV/0!	#DIV/0!	0.402619	#DIV/0!		4.67581
AS3A xrn1	1.47182	2.90448	1.58519	#DIV/0!		1.0258	1.47688	2.5682	#DIV/0!		1.24881	2.19068	2.0767	#DIV/0!	0.223011	0.713801	0.491508	#DIV/0!		3.43949
AS1M	0.953311	1.66657	0.45501	#DIV/0!		0.669204	1.52108	0.278393	#DIV/0!		0.811257	1.59383	0.366702	#DIV/0!	0.142054	0.0727438	0.0883084	#DIV/0!		2.40508
AS2M	0.98119	1.13102	0.634744	#DIV/0!		0.79055	0.910049	0.544853	#DIV/0!		0.88587	1.02054	0.589798	#DIV/0!	0.0953201	0.110487	0.0449454	#DIV/0!		1.90641
AS3M	0.842656	0.937146	0.750781	#DIV/0!		0.687647	0.750107	0.936658	#DIV/0!		0.765151	0.843627	0.84372	#DIV/0!	0.0775045	0.0935195	0.0929389	#DIV/0!		1.60878
AS1M xrn1	1.09303	2.35858	0.924232	#DIV/0!		1.083	2.15787	1.32979	#DIV/0!		1.08802	2.25822	1.12701	#DIV/0!	0.00501407	0.100355	0.202779	#DIV/0!		3.34624
AS2M xrn1	0.556009	0.975108	0.675064	#DIV/0!		1.19031	1.3443	2.32902	#DIV/0!		1.19031	1.3443	2.32902	#DIV/0!						2.53461
AS3M xrn1	0.943749	2.11469	1.50975	#DIV/0!		0	0	2.8169	#DIV/0!		0.943749	2.11469	2.16333	#DIV/0!	#DIV/0!	#DIV/0!	0.653573	#DIV/0!		3.05844													.

## Sheet: 8. URA3 v AS1
data minus background
all + dCas9	CRISPR 1									CRISPR 2
	HMS2 S	HMS2 S truncated		HMS2 AS		BAT2 S		18S		HMS2 S	HMS2 S truncated		HMS2 AS		BAT2 S		18S
BY4741 + pRS315	46029.1	31917.8		51357.7		43669.3		75114.8		31097.6	25991.3		60193.3		47562.9		44814.2
HMS2.URA3 + pRS315	73012	51931.7		20067.5		23834.3		63263.6		57769	45686.5		17217.6		28121		58096.4
snR52::URA3	49767.5	32434.5		67592.5		61142.7		56628.1		38791.4	27149.5		78923.2		55724.8		45986.4
AS1A	50248.9	57980.7		35089.3		60181.6		52514.8		42441.9	49437.8		41713.1		50493.4		40146.4
AS1M	57106.3	57776.3		33580.2		60725.8		55073.3		45287.1	49371.5		23184.5		54887.2		30115.3
xrn1 + pRS315	85665.1	65798.8		93149.7		76952.9		46522.9		59860.2	50993.3		79860.9		82665.2		23445.6
HMS2.URA3 xrn1 + pRS315	99340.6	99458		16757.6		64674.8		36322.5		76717.6	66977.5		7199.58		65315.1		19064.2
snR52::URA3 xrn1	81209.7	65437.9		95029.2		88019.8		40777.6		54364.4	49558.1		70702.1		93771.3		23556.1
AS1A xrn1	78218.8	89811		53198.3		71615.8		41576.6		54005.8	68973.4		37889.9		81448.8		28445.4
AS1M xrn1	80197.3	86341.9		50030.3		64612.4		37620.5		51985.5	57324.5		34156.3		84121.4		29158.8
Normalised to BY4741	CRISPR 1					CRISPR 2					AVERAGE				SEM
	HMS2 S	HMS2 S truncated	HMS2 AS	BAT2 S	18S	HMS2 S	HMS2 S truncated	HMS2 AS	BAT2 S	18S	HMS2 S	HMS2 S trunc	HMS2 AS	BAT2 S	HMS2 S	HMS2 S trunc	HMS2 AS	BAT2 S
BY4741 + pRS315	1	1	1	1	1	1	1	1	1	1	1	1	1	1	0	0	0	0
HMS2.URA3 + pRS315	1.58621	1.62704	0.39074	0.545792	0.842226	1.85767	1.75776	0.286038	0.591238	1.29638	1.72194	1.6924	0.338389	0.568515	0.135726	0.0653578	0.052351	0.0227233
snR52::URA3	1.08122	1.01619	1.31611	1.40013	0.753887	1.24741	1.04456	1.31116	1.1716	1.02616	1.16431	1.03037	1.31364	1.28587	0.083095	0.0141871	0.00247381	0.114263
AS1 Click	1.09168	1.81656	0.683233	1.37812	0.699127	1.3648	1.90209	0.692987	1.06161	0.89584	1.22824	1.85933	0.68811	1.21987	0.136559	0.0427629	0.00487664	0.158253
AS1 MWG	1.24066	1.81016	0.653849	1.39058	0.733189	1.45629	1.89954	0.385167	1.15399	0.672004	1.34847	1.85485	0.519508	1.27229	0.107816	0.0446889	0.134341	0.118296
xrn1 + pRS315	1.86111	2.06151	1.81374	1.76217	0.619357	1.92491	1.96193	1.32674	1.73802	0.523174	1.89301	2.01172	1.57024	1.7501	0.0319028	0.0497855	0.2435	0.012078
HMS2.URA3 xrn1 + pRS315	2.15821	3.11606	0.326292	1.48101	0.48356	2.46699	2.57692	0.119608	1.37324	0.425405	2.3126	2.84649	0.22295	1.42712	0.15439	0.269574	0.103342	0.0538882
snR52::URA3 xrn1	1.76431	2.0502	1.85034	2.0156	0.54287	1.74819	1.90672	1.17458	1.97152	0.52564	1.75625	1.97846	1.51246	1.99356	0.00806275	0.0717421	0.337878	0.0220379
AS1 Click xrn1	1.69933	2.81382	1.03584	1.63996	0.553507	1.73665	2.65371	0.629471	1.71245	0.63474	1.71799	2.73376	0.832655	1.6762	0.0186599	0.0800561	0.203184	0.0362442
AS1 MWG xrn1	1.74232	2.70513	0.974154	1.47958	0.50084	1.67169	2.20552	0.567444	1.76864	0.650661	1.707	2.45533	0.770799	1.62411	0.0353146	0.249803	0.203355	0.144526
Normalised to own control ie BY or snR
	CRISPR 1					CRISPR 2					AVERAGE				SEM
	HMS2 S	HMS2 S truncated	HMS2 AS	BAT2 S	18S	HMS2 S	HMS2 S truncated	HMS2 AS	BAT2 S	18S	HMS2 S	HMS2 S trunc	HMS2 AS	BAT2 S	HMS2 S	HMS2 S trunc	HMS2 AS	BAT2 S
BY4741 + pRS315	1	1	1	1	1	1	1	1	1	1	1	1	1	1	0	0	0	0
HMS2.URA3 + pRS315	1.58621	1.62704	0.39074	0.545792	0.842226	1.85767	1.75776	0.286038	0.591238	1.29638	1.72194	1.6924	0.338389	0.568515	0.135726	0.0653578	0.052351	0.0227233
snR52::URA3	1	1	1	1	1	1	1	1	1	1	1	1	1	1	0	0	0	0
AS1A	1.00967	1.78763	0.519131	0.984281	0.927363	1.09411	1.82095	0.528528	0.906121	0.873004	1.05189	1.80429	0.523829	0.945201	0.0422161	0.0166593	0.00469878	0.0390796
AS1M	1.14746	1.78132	0.496804	0.993183	0.972544	1.16745	1.8185	0.29376	0.984969	0.654874	1.15746	1.79991	0.395282	0.989076	0.00999487	0.0185887	0.101522	0.00410691
xrn1 + pRS315	1.86111	2.06151	1.81374	1.76217	0.619357	1.92491	1.96193	1.32674	1.73802	0.523174	1.89301	2.01172	1.57024	1.7501	0.0319028	0.0497855	0.2435	0.012078
HMS2.URA3 xrn1 + pRS315	2.15821	3.11606	0.326292	1.48101	0.48356	2.46699	2.57692	0.119608	1.37324	0.425405	2.3126	2.84649	0.22295	1.42712	0.15439	0.269574	0.103342	0.0538882
snR52::URA3 xrn1	1.63178	2.01754	1.40591	1.43958	0.720094	1.40145	1.82538	0.895834	1.68276	0.512241	1.51662	1.92146	1.15087	1.56117	0.115163	0.0960837	0.25504	0.121589
AS1A xrn1	1.57168	2.769	0.787045	1.17129	0.734204	1.39221	2.5405	0.480086	1.46163	0.61856	1.48195	2.65475	0.633566	1.31646	0.0897373	0.114249	0.153479	0.145169
AS1M xrn1	1.61144	2.66204	0.740176	1.05675	0.664343	1.34013	2.11144	0.432779	1.50959	0.634075	1.47578	2.38674	0.586477	1.28317	0.135655	0.275302	0.153699	0.22642
																																	.

## Sheet: 9. HMS2 probe series
data without the background
all + dCas9	expt 1																												expt2
	HMS2 H1 S	HMS2 H1 S truncated		H2 S	H2 S trunc		H2.5 S	H2.5 S trunc		H4 S	H4 S trunc		BAT2 S		HMS2 H1 AS	HMS2 H1 AS truncated		H2 AS	H2 AS trunc		H2.5 AS	H2.5 AS trunc		H4 AS	H4 AS trunc	rRNA	18S	rRNA	HMS2 H1 S	HMS2 H1 S truncated		H2 S	H2 S trunc		H3 S	H3 S trunc		H4 S	H4 S trunc		BAT2 S		HMS2 H1 AS	HMS2 H1 AS truncated		H2 AS	H2 AS trunc		H3 AS
snR52::URA3	13956.5	7960.61		14621.1	8395		12788.1	6274.68		16218.2	13541.9		8631.23		13500.6	9481.41		15565.9	16357.8					14587.4	10955.3		11962.9		13284.9	6546.66		15579	10346.8		15768.6	9145.29		16801	13259.2		11279.4		15591	12059.9		17470.2	13971.5
AS1A	16088	13446.9		12781.3	11308.1		10038.3	11249.3		13723.7	11097.2		9166.66		7061.46	5731.88		9533.24	11192.9					11106.5	5534.51		11579.9		14856.7	14778.4		11032.2	11153		11115.1	12021.3		13985.1	12557.5		9824.42		7642.95	8796.9		10465.9	9387.37
AS1M	12430.9	12358		10372.7	10306.7		10671.6	10826.1		11826.5	9680.47		7464.83		5554.24	4692.07		8702.79	9867.48					8550.92	6081		12796.8		13442.3	12527.4		10632.7	9817.37		11892.8	8625.87		14372.3	11551.5		8487.58		6080.36	7710.65		9480.09	8578.92
snR52::URA3 xrn1	16517.4	12773.2		14053.2	8814.49		14671.6	10231.2		18234.4	15220.3		10931.4		15571	10806.4		15406	14934.2					19160.8	19388.5		13002.3		15513.8	9896.05		13414	7826.42		16207.3	6266.87		21017.5	17193.5		11347.8		16039.8	15020.7		15559.4	14409.2
AS1A xrn1	17244.7	17427.1		9833.8	10177.4		9786	12202.9		12248.8	9055.94		9028.52		7458.99	10423.1		9274.02	12641.7					7960.75	3798.35		11995.1		20024.5	17540.8		8059.22	9729.32		10600.2	9290.6		12387	10191.7		8988		9351.09	14817.1		10628.5	11836.4
AS1M xrn1	16767.5	14688.5		10478.2	10578.4		11473.5	11504.4		12745.4	10592.2		10602.5		12793.5	14197.7		11814.4	11655.8					8771.42	4332.63		12024.7		18575.7	15946.2		12433.4	11512.9		13069.9	9751.63		16497.5	13031.2		11813.2		12732.2	14955		13418.7	13688.5
																					PICKING UP S																												PICKING UP S - do not analyse
Normalised to snR52::URA3	CRISPR 1																		Expt 2																		AVERAGE
	HMS2 H1 S	HMS2 H1 S truncated	H2 S	H2 S trunc	H2.5 S	H2.5 S trunc	H4 S	H4 S trunc	BAT2 S	HMS2 H1 AS	HMS2 H1 AS truncated	H2 AS	H2 AS trunc	H2.5 AS	H2.5 AS trunc	H4 AS	H4 AS trunc	18S	HMS2 H1 S	HMS2 H1 S truncated	H2 S	H2 S trunc	H2.5 S	H2.5 S trunc	H4 S	H4 S trunc	BAT2 S	HMS2 H1 AS	HMS2 H1 AS truncated	H2 AS	H2 AS trunc	H3 S	H3 S trunc	H4 AS	H4 AS trunc	18S	HMS2 H1 S	HMS2 H1 S trunc	H2 S	H2 S trunc	H2.5 S	H2.5 S trunc	H4 S	H4 S trunc	BAT2 S	HMS2 H1 AS	HMS2 H1 AS truncated	H2 AS	H2 AS trunc
snR52::URA3	1	1	1	1	1	1	1	1	1	1	1	1	1	#DIV/0!	#DIV/0!	1	1	1	1	1	1	1	1	1	1	1	1	1	1	1	1	#DIV/0!	#DIV/0!	1	1	1	1	1	1	1	1	1	1	1	1	1	1	1	1
AS1A	1.15273	1.68918	0.874166	1.347	0.784975	1.7928	0.84619	0.81947	1.06203	0.523047	0.604539	0.612445	0.684258	#DIV/0!	#DIV/0!	0.761375	0.505189	0.967986	1.11832	2.25739	0.708143	1.07791	0.704886	1.31448	1.31448	0.832398	0.871008	0.490216	0.729434	0.599068	0.671894	#DIV/0!	#DIV/0!	0.648509	0.698814	0.916216	1.13553	1.97329	0.791155	1.21246	0.744931	1.55364	1.08033	0.825934	0.966521	0.506631	0.666987	0.605756	0.678076
AS1M	0.89069	1.5524	0.709433	1.22771	0.834492	1.72537	0.729211	0.714852	0.864864	0.411406	0.494871	0.559094	0.60323	#DIV/0!	#DIV/0!	0.586187	0.555073	1.06971	1.01185	1.91355	0.682499	0.948827	0.754205	0.943204	0.943204	0.855447	0.752487	0.389992	0.639363	0.542642	0.61403	#DIV/0!	#DIV/0!	0.6516	0.601136	0.989417	0.951271	1.73297	0.695966	1.08827	0.794348	1.33429	0.836207	0.785149	0.808675	0.400699	0.567117	0.550868	0.60863
snR52::URA3 xrn1	1.18349	1.60455	0.96116	1.04997	1.14729	1.63056	1.12432	1.12394	1.26649	1.15336	1.13974	0.989729	0.912975	#DIV/0!	#DIV/0!	1.31352	1.76978	1.08688	1.16778	1.51162	0.861025	0.756406	1.02782	0.685257	0.685257	1.25097	1.00607	1.02878	1.24551	0.890624	1.03133	#DIV/0!	#DIV/0!	1.56061	1.98045	0.943123	1.17564	1.55808	0.911093	0.903187	1.08755	1.15791	0.904789	1.18745	1.13628	1.09107	1.19263	0.940176	0.972151
AS1A xrn1	1.2356	2.18917	0.672575	1.21231	0.765243	1.94478	0.755249	0.668734	1.04603	0.552492	1.09932	0.595792	0.772825	#DIV/0!	#DIV/0!	0.545729	0.346713	1.00269	1.50732	2.67936	0.517311	0.940317	0.672233	1.01589	1.01589	0.737281	0.796854	0.599775	1.22863	0.60838	0.847179	#DIV/0!	#DIV/0!	0.696267	0.732902	0.889277	1.37146	2.43426	0.594943	1.07631	0.718738	1.48034	0.885569	0.703007	0.921442	0.576134	1.16397	0.602086	0.810002
AS1M xrn1	1.20141	1.84515	0.716651	1.26008	0.897199	1.83346	0.785873	0.782182	1.22839	0.947621	1.49743	0.758992	0.712553	#DIV/0!	#DIV/0!	0.601302	0.395482	1.00516	1.39826	2.43578	0.798085	1.1127	0.828855	1.0663	1.0663	0.981939	1.04733	0.816641	1.24006	0.768089	0.979744	#DIV/0!	#DIV/0!	0.912845	0.672045	0.870092	1.29984	2.14046	0.757368	1.18639	0.863027	1.44988	0.926087	0.88206	1.13786	0.882131	1.36875	0.763541	0.846149
																																					AVERAGE
																																					H1 S	H2 S	H3 S	H4 S	H1 S trunc	H2 S trunc	H3 S trunc	H4 S trunc	BAT2 S	H1 AS	H2 AS	H3 AS	H4 AS
																																				snR52::URA3	1	1	1	1	1	1	1	1	1	1	1	#DIV/0!	1
																																				AS1A	1.13553	0.791155	0.744931	1.08033	1.97329	1.21246	1.55364	0.825934	0.966521	0.506631	0.605756	#DIV/0!	0.704942
																																				AS1M	0.951271	0.695966	0.794348	0.836207	1.73297	1.08827	1.33429	0.785149	0.808675	0.400699	0.550868	#DIV/0!	0.618894
																																				snR52::URA3 xrn1	1.17564	0.911093	1.08755	0.904789	1.55808	0.903187	1.15791	1.18745	1.13628	1.09107	0.940176	#DIV/0!	1.43707
																																				AS1A xrn1	1.37146	0.594943	0.718738	0.885569	2.43426	1.07631	1.48034	0.703007	0.921442	0.576134	0.602086	#DIV/0!	0.620998
																																				AS1M xrn1	1.29984	0.757368	0.863027	0.926087	2.14046	1.18639	1.44988	0.88206	1.13786	0.882131	0.763541	#DIV/0!	0.757074
																																	.
[truncated: 23 more columns]

## Sheet: 10. ALL GAL1AS +112 Northerns
Normalised data	time	CRISPR 3			CRISPR 4			TATAv112 1			TATAv112 2						average			SEM	n=4
to ADH4 snR52::URA3 90 min or 0	0	GAL1 S	GAL1AS-background	GAL10	GAL1 S	GAL1AS-background	GAL10S	GAL1 S	GAL1AS	GAL10S	GAL1 S	GAL1AS	GAL10S				GAL1 S	GAL1AS-background	GAL10S	GAL1 S	GAL1AS	GAL10S
snR52::URA3	0	0.0774244	1	0.193575	0.10882	1	0.266332	0.0545243	1	0.121971	0.179913	1	0.186976		ADH4 snR52::URA3	0	0.105171	1	0.192214	0.0272865	0	0.0295195
	60	0.146027	0.863922	0.154619	0.189269	0.853075	0.453458	0.137425	0.985043	0.302224	0.256574	0.365902	0.357362			60	0.182324	0.766986	0.316916	0.0272256	0.136999	0.062474
	90	1	0.864221	1	1	0.984632	1	1	0.777154	1	1	0.66945	1			90	1	0.823864	1	0	0.0667711	0
															GAL1AS 112	0	0.0667671	0.356718	0.17296	0.00565058	0.180929	0.0676436
GAL1AS 112	0	0.062243	0.278768	0.126169	0.0653217	0.756388	0.3738	0.0566605	0.49188	0.079873	0.0828434	-0.100164	0.111997			60	0.108193	0.520932	0.251818	0.0072938	0.109923	0.0679652
	60	0.1165	0.75278	0.135085	0.0908318	0.646978	0.446894	0.123373	0.417188	0.231099	0.102065	0.26678	0.194193			90	0.77219	0.388782	0.900551	0.0759791	0.212414	0.0580787
	90	0.956209	0.723287	0.797851	0.819915	0.620489	1.06297	0.712359	0.433975	0.900405	0.600278	-0.222622	0.840975
		scroll down for more AS
Background-subtracted GAL1AS t=0
Normalised data
to ADH4 snR52::URA3 t= 0	CRISPR 1	CRISPR 2	CRISPR 3	CRISPR 4	TATA v 112 1	TATA v 112 2		average	SEM
snR52::URA3	1	1	1	1	1	1		1	0
GAL1AS 112	0.596516	0.260354	0.278768	0.756388	0.49188	-0.100164		0.380624	0.123313	0.00402548
unnormalised data	CRISPR 1	CRISPR 2	CRISPR 3	CRISPR 4	SH9 v 112 1	SH9 v 112 2		average	SEM	Ttest
snR52::URA3	38918.1	50798	50194.1	0	73128.4	54935.2		44662.3	10019.7
GAL1AS 112	28161.1	17343	34360.3	0	49307.6	38092.2		27877.4	7056.5	0.0152822
GAL1 S t=90
Normalised data
to ADH4 snR52::URA3 t= 0	CRISPR 1	CRISPR 2	CRISPR 3	CRISPR 4	TATA v 112 1	TATA v 112 2		average	SEM
snR52::URA3			1	1	1	1		1	0
GAL1AS 112			0.956209	0.819915	0.712359	0.600278		0.77219	0.0759791	0.0577463
unnormalised data	CRISPR 1	CRISPR 2	CRISPR 3	CRISPR 4	SH9 v 112 1	SH9 v 112 2		average	SEM	Ttest
snR52::URA3			41395.3	46546.8	66885.3	37350.3		48044.4	6556.15
GAL1AS 112			39582.5	38164.5	47646.4	22420.6		36953.5	5275.12	0.0620945

[truncated: 7 more sheets: 11. GAL expts 1-4, 12. TATA v 112, 13. dCas9 ChIP - normalised, 14. dCas9 ChIP - combined, 15. dCas9 ChIP - Expt 1, 16. dCas9 ChIP - Expt 2, 17. dCas9 ChIP - Expt 3]
