# Supplementary figures and images for: CRISPRi is not strand-specific at all loci and redefines the transcriptional landscape
Source: eLife journal article supplement (doi:10.7554/elife.29878), 2017-10-23

Figure S1:

**HMS2 strains:**

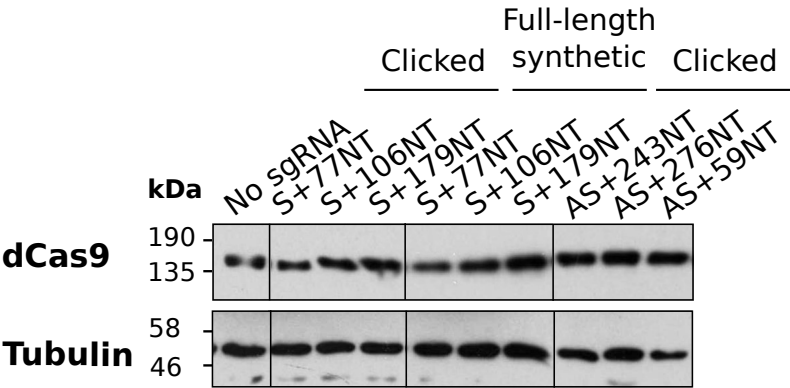

**GAL1 strains:**

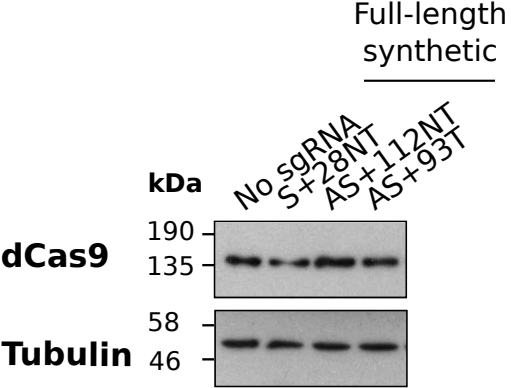

**HMS2 strains:**

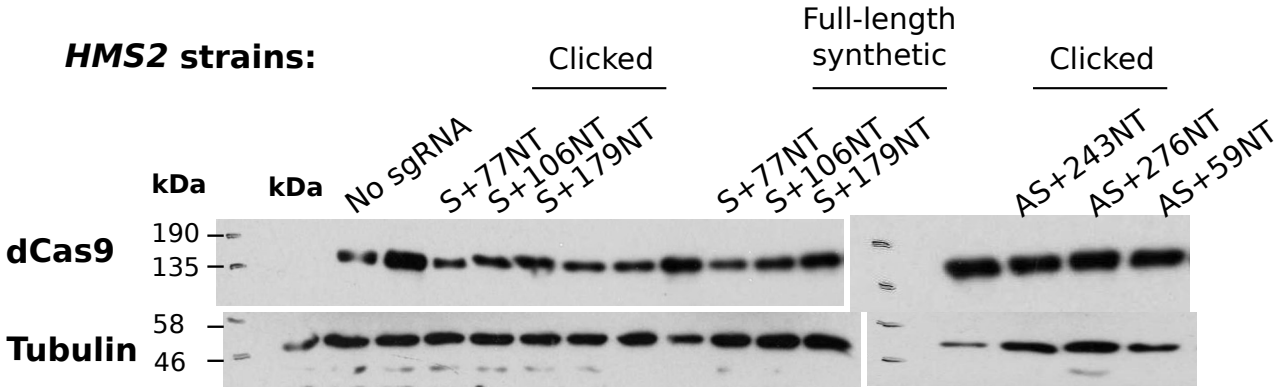

Supplement: supp [file elife_poa_e29878_Figure_1_figure_supplement_1.pdf › elife_poa_e29878_Figure_1_figure_supplement_1.pdf]

Figure 2 Supplement 1

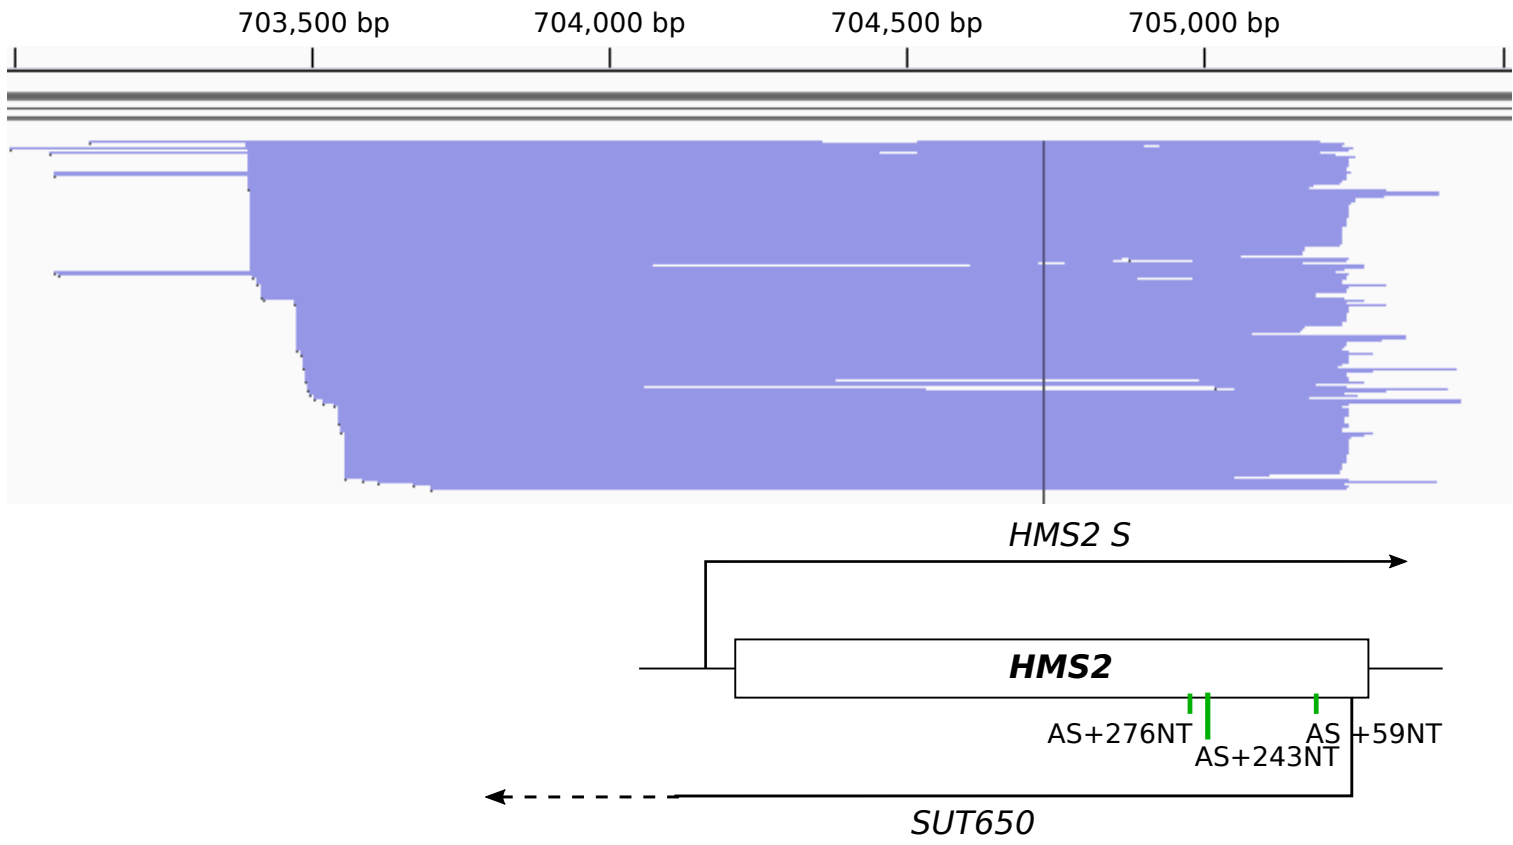

Supplement: supp [file elife_poa_e29878_Figure_2_figure_supplement_1.pdf › elife_poa_e29878_Figure_2_figure_supplement_1.pdf]

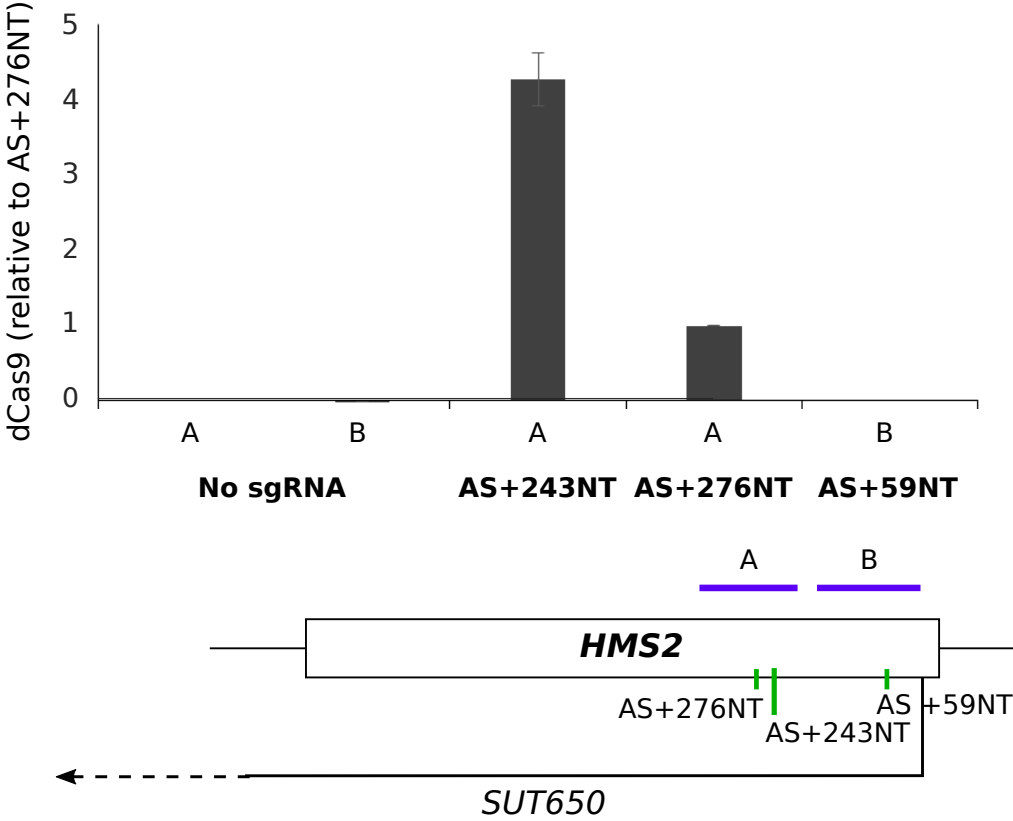

Supplement: supp [file elife_poa_e29878_Figure_2_figure_supplement_2.pdf › elife_poa_e29878_Figure_2_figure_supplement_2.pdf]

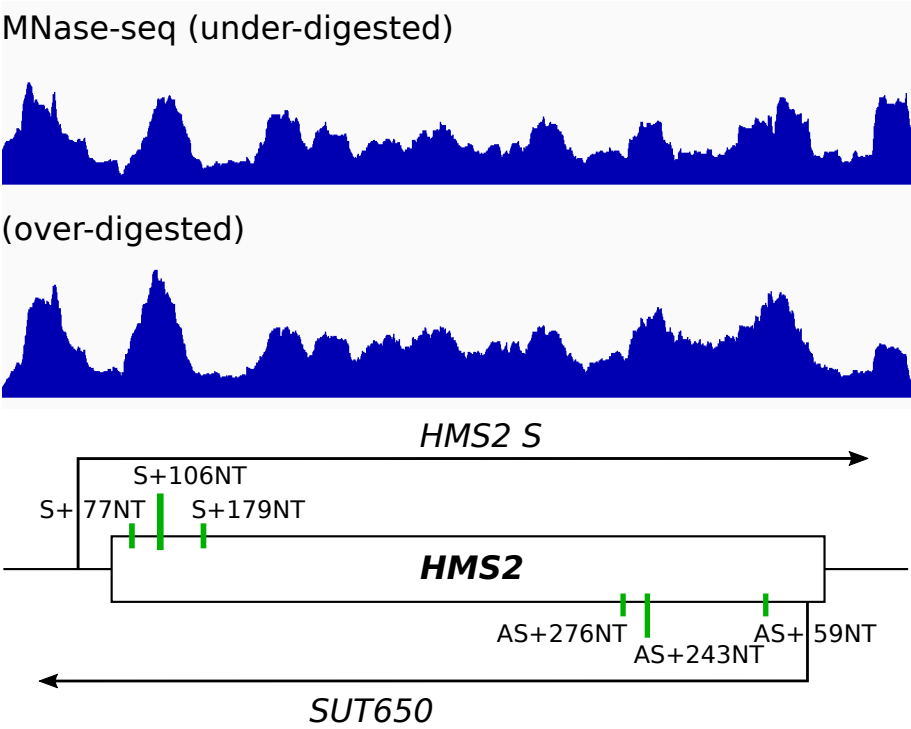

| sgRNA    | Relative nucleosome occupancy |       |
|----------|-------------------------------|-------|
|          | Under                         | Over  |
| S+77NT   | 4.295                         | 14.17 |
| S+106NT  | 16.04                         | 33.99 |
| S+179NT  | 9.391                         | 11.51 |
| AS+243NT | 16.53                         | 19.36 |
| AS+276NT | 11.97                         | 15.09 |
| AS+59NT  | 22.7                          | 28.27 |

Supplement: supp [file elife_poa_e29878_Figure_2_figure_supplement_3.pdf › elife_poa_e29878_Figure_2_figure_supplement_3.pdf]

Figure 3 Supplement 1

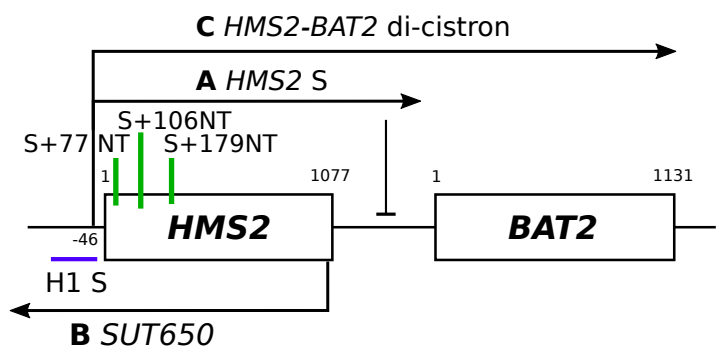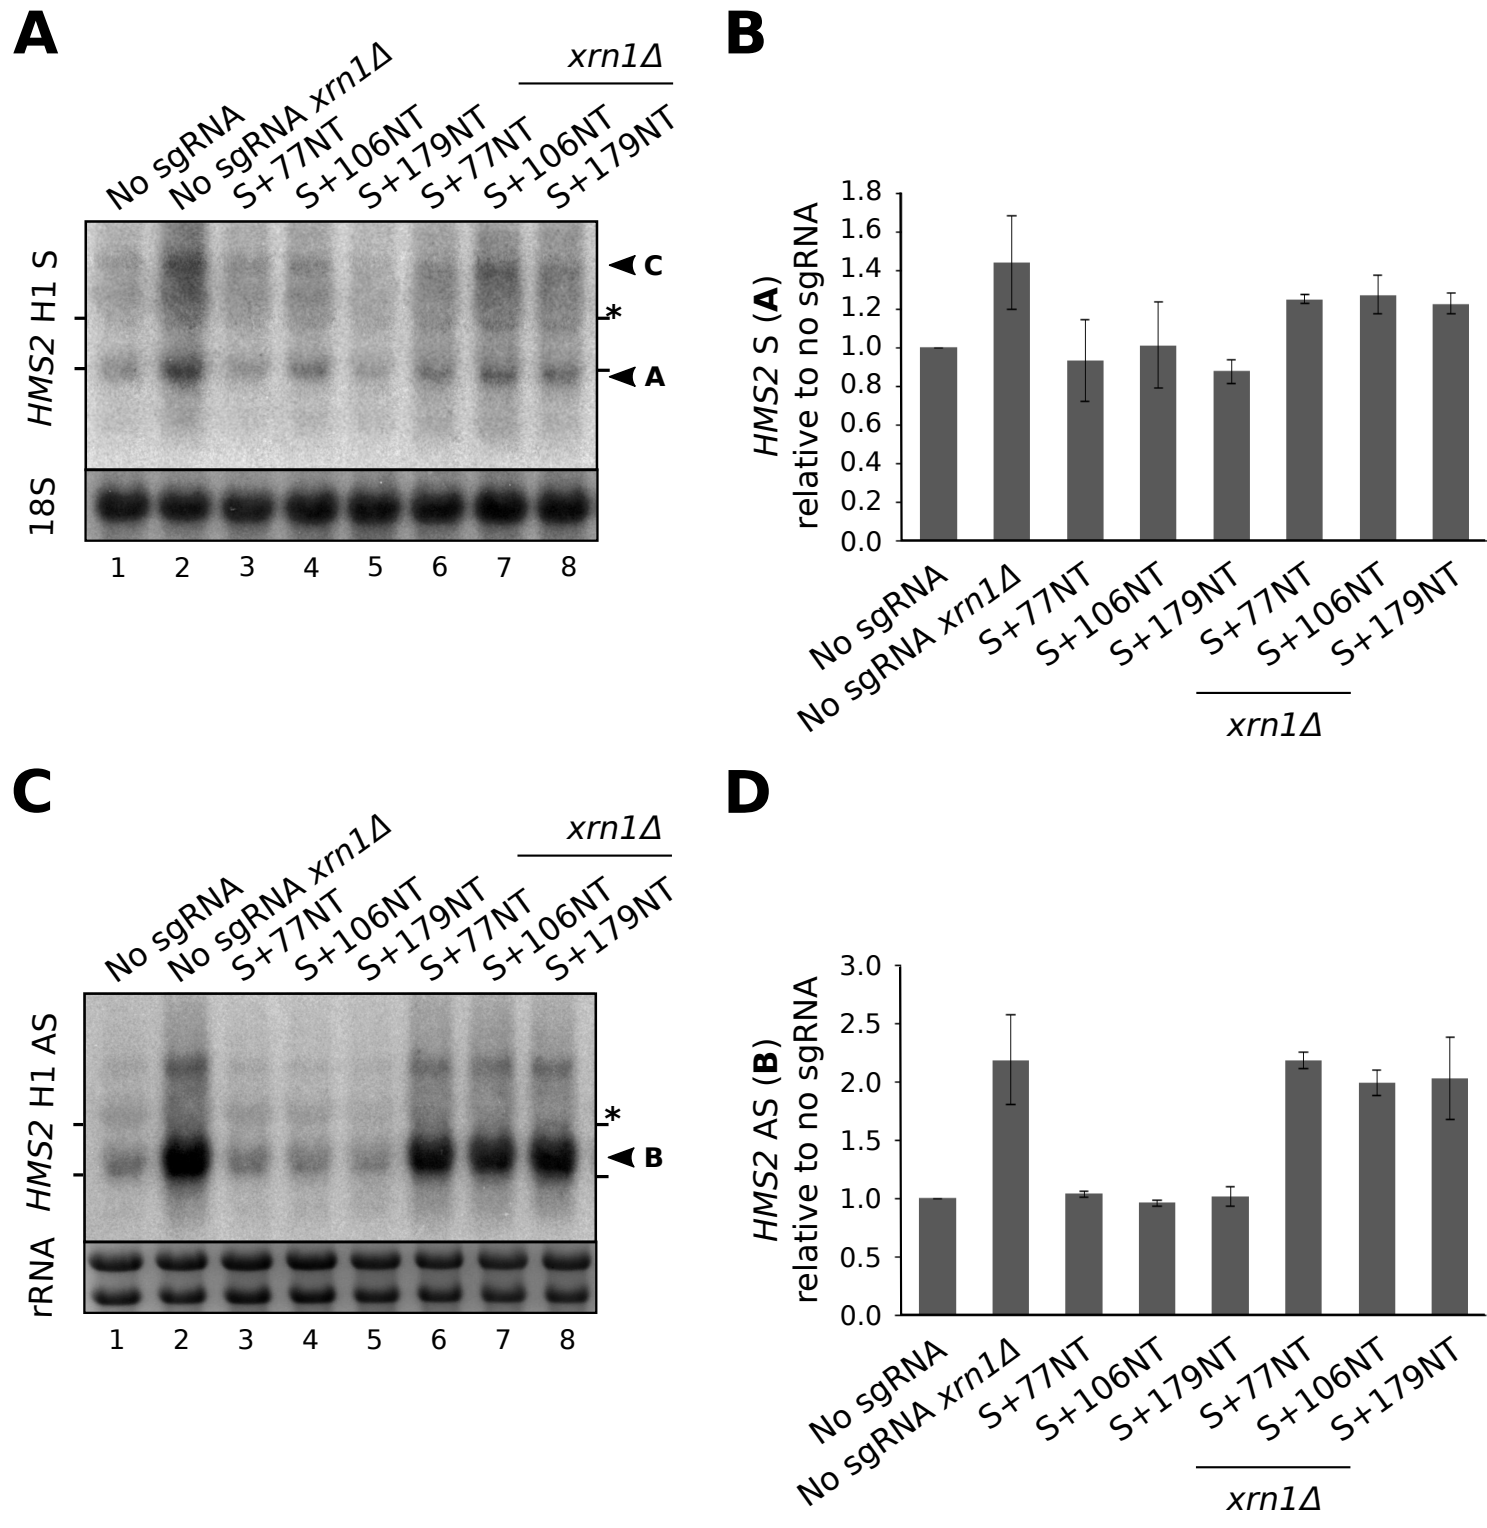

Supplement: supp [file elife_poa_e29878_Figure_3_figure_supplement_1.pdf › elife_poa_e29878_Figure_3_figure_supplement_1.pdf]
